# Supplementary material for: ChIP-seq Profiling Identifies Histone Deacetylase 2 Targeting Genes Involved in Immune and Inflammatory Regulation Induced by Calcitonin Gene-Related Peptide in Microglial Cells
Source: J Immunol Res. 2020 Aug 4;2020:4384696. doi: 10.1155/2020/4384696 (PMC7424498; doi:10.1155/2020/4384696)
Supplement: Supplementary Materials — Table S1: differentially enriched regions for up and down peak-promoter-annotation. [file 4384696.f1.xlsx]

## Sheet: up_CGRP-ChIP-HDAC2_vs_Con-Ch
differentially enriched regions for up_CGRP-ChIP-HDAC2_vs_Con-ChIP-HDAC2 (promoter) Fold Change: 2.0 P-value: 0.001 Column A: RefSeq_name: Refseq accession number of the nearest gene to a peak. Column B: Symbol: Gene symbol. Column C: Chr: The chromosome that the transcript lies in. Column D: TSS: The start sites of the transcript. Column E: TTS: The end sites of the transcript. Column F: Strand:…
Refseq_name	symbol	chr	TSS	TTS	strand	chr:start-end	length	CGRP-ChIP-A1-HDAC2 count	Con-ChIP-B1-HDAC2 count	fc	pval	padj	differentially enriched regions Classification	center_to_TSS
NM_011929	Clcn6	chr4	148038813	148004258	-	chr4:148036101-148037600	1500	9.8	0	981	0.000228261	0.0388555	promoter	1963
NM_001142681	Chid1	chr7	141539857	141493135	-	chr7:141539801-141541100	1300	8.98	0	899	0.000417779	0.0461418	promoter	-593
NM_026522	Chid1	chr7	141539857	141493135	-	chr7:141539801-141541100	1300	8.98	0	899	0.000417779	0.0461418	promoter	-593
NM_001081355	Prdm2	chr4	143212709	143107390	-	chr4:143209901-143212800	2900	23.68	3.67	6.4375	5.30525e-05	0.0262545	promoter	1359
NM_001256380	Prdm2	chr4	143212709	143127468	-	chr4:143209901-143212800	2900	23.68	3.67	6.4375	5.30525e-05	0.0262545	promoter	1359
NM_013650	S100a8	chr3	90669070	90670034	+	chr3:90667601-90671000	3400	29.39	8.57	3.42657	0.00051168	0.0508625	promoter	230
NM_145466	Ggact	chr14	122913165	122890859	-	chr14:122913001-122914100	1100	8.16	0	817	0.000767161	0.0508625	promoter	-385
NM_007423	Afp	chr5	90490713	90508907	+	chr5:90488701-90490600	1900	13.88	1.22	11.2927	0.000420465	0.0461418	promoter	-1063
NM_001110101	Lsm2	chr17	34981853	34985893	+	chr17:34980101-34984700	4600	42.46	17.15	2.47494	0.000864406	0.0508625	promoter	547
NM_001204274	Lsm2	chr17	34981853	34985891	+	chr17:34980101-34984700	4600	42.46	17.15	2.47494	0.000864406	0.0508625	promoter	547
NM_030597	Lsm2	chr17	34982129	34985893	+	chr17:34980101-34984700	4600	42.46	17.15	2.47494	0.000864406	0.0508625	promoter	271
NM_001204273	Lsm2	chr17	34982129	34985891	+	chr17:34980101-34984700	4600	42.46	17.15	2.47494	0.000864406	0.0508625	promoter	271
NM_175399	Exosc4	chr15	76327396	76330670	+	chr15:76326801-76329600	2800	19.6	3.67	5.3288	0.000543504	0.0508625	promoter	804
NM_146329	Olfr642	chr7	104050352	104049407	-	chr7:104049301-104050800	1500	10.61	0	1062	0.000125063	0.0322374	promoter	302
NM_008801	Pde6d	chr1	86582501	86543014	-	chr1:86580101-86583500	3400	26.13	3.67	7.10326	1.26883e-05	0.0155657	promoter	701
NM_198958	Nox3	chr17	3696261	3635239	-	chr17:3695001-3696900	1900	13.06	1.22	10.626	0.000715246	0.0508625	promoter	311
NM_145501	Pi4k2a	chr19	42090434	42122218	+	chr19:42090301-42091600	1300	8.16	0	817	0.000767161	0.0508625	promoter	516
NM_028233	Lrpprc	chr17	84790786	84705246	-	chr17:84788701-84792700	4000	29.39	6.12	4.79608	4.65552e-05	0.025061	promoter	86
NM_010516	Cyr61	chr3	145649985	145646970	-	chr3:145647101-145648900	1800	11.43	0	1144	6.86875e-05	0.0268853	promoter	1985
NM_010240	Ftl1	chr7	45459886	45457943	-	chr7:45459701-45461200	1500	11.43	0	1144	6.86875e-05	0.0268853	promoter	-564
NM_013604	Mtx1	chr3	89214335	89209080	-	chr3:89210601-89217700	7100	70.22	34.29	2.04752	0.000384715	0.0461418	promoter	185
NM_001161824	Mtx1	chr3	89214335	89209080	-	chr3:89210601-89217700	7100	70.22	34.29	2.04752	0.000384715	0.0461418	promoter	185
NM_013691	Thbs3	chr3	89215186	89226837	+	chr3:89210601-89217700	7100	70.22	34.29	2.04752	0.000384715	0.0461418	promoter	-1036
NR_105894	Mir6929	chr11	101419253	101419186	-	chr11:101417401-101419000	1600	12.25	0	1226	3.78041e-05	0.0217706	promoter	1053
NM_144829	Aarsd1	chr11	101417433	101406839	-	chr11:101417401-101419000	1600	12.25	0	1226	3.78041e-05	0.0217706	promoter	-767
NM_001034899	Gm16432	chr1	177991434	178048291	+	chr1:177988301-177991800	3500	34.29	12.25	2.79772	0.000975748	0.0508625	promoter	-1384
NR_027859	Pfkfb2	chr1	130715821	130689042	-	chr1:130716501-130718100	1600	12.25	0	1226	3.78041e-05	0.0217706	promoter	-1479
NM_178691	Yod1	chr1	130717326	130722057	+	chr1:130716501-130718100	1600	12.25	0	1226	3.78041e-05	0.0217706	promoter	-26
NM_008825	Pfkfb2	chr1	130715821	130692254	-	chr1:130716501-130718100	1600	12.25	0	1226	3.78041e-05	0.0217706	promoter	-1479
NM_178394	Jakmip1	chr5	37050856	37125298	+	chr5:37049701-37051100	1400	8.98	0	899	0.000417779	0.0461418	promoter	-456
NM_175107	2310022A10Rik	chr7	27553289	27582098	+	chr7:27551901-27553000	1100	9.8	0	981	0.000228261	0.0388555	promoter	-839
NM_011116	Pld3	chr7	27553218	27531999	-	chr7:27551901-27553000	1100	9.8	0	981	0.000228261	0.0388555	promoter	768
NM_001317355	Pld3	chr7	27553218	27531999	-	chr7:27551901-27553000	1100	9.8	0	981	0.000228261	0.0388555	promoter	768
NR_015386	Six3os1	chr17	85618396	85609089	-	chr17:85617201-85618500	1300	8.16	0	817	0.000767161	0.0508625	promoter	546
NR_015385	Six3os1	chr17	85618396	85609089	-	chr17:85617201-85618500	1300	8.16	0	817	0.000767161	0.0508625	promoter	546
NR_038086	Six3os1	chr17	85618396	85609089	-	chr17:85617201-85618500	1300	8.16	0	817	0.000767161	0.0508625	promoter	546
NR_038083	Six3os1	chr17	85618396	85609089	-	chr17:85617201-85618500	1300	8.16	0	817	0.000767161	0.0508625	promoter	546
NR_038084	Six3os1	chr17	85618396	85609089	-	chr17:85617201-85618500	1300	8.16	0	817	0.000767161	0.0508625	promoter	546
NR_038082	Six3os1	chr17	85618396	85609089	-	chr17:85617201-85618500	1300	8.16	0	817	0.000767161	0.0508625	promoter	546
NR_038085	Six3os1	chr17	85618396	85601931	-	chr17:85617201-85618500	1300	8.16	0	817	0.000767161	0.0508625	promoter	546
NR_015387	Six3os1	chr17	85618396	85607357	-	chr17:85617201-85618500	1300	8.16	0	817	0.000767161	0.0508625	promoter	546
NM_010807	Marcksl1	chr4	129513580	129515981	+	chr4:129513801-129516800	3000	20.41	2.45	8.30081	5.93155e-05	0.0268853	promoter	1720
NM_024475	Ublcp1	chr11	44470548	44454570	-	chr11:44469201-44472700	3500	26.13	6.12	4.26427	0.000257169	0.0398887	promoter	-402
NM_020034	Hist1h1b	chr13	21780625	21779831	-	chr13:21779201-21781000	1800	12.25	0	1226	3.78041e-05	0.0217706	promoter	525
NM_001163085	Map3k15	chrX	159988432	160123351	+	chrX:159988501-159992200	3700	28.58	7.35	3.88451	0.000251505	0.0393111	promoter	1918
NM_026633	Fam195a	chr17	25868738	25863697	-	chr17:25866701-25867900	1200	8.16	0	817	0.000767161	0.0508625	promoter	1438
NM_177394	Endov	chr11	119491619	119511465	+	chr11:119492801-119494100	1300	9.8	0	981	0.000228261	0.0388555	promoter	1831
NM_001135569	1190007I07Rik	chr10	82623228	82619850	-	chr10:82621101-82625000	3900	31.84	8.57	3.71212	0.000159344	0.0365666	promoter	178
NM_001135567	1190007I07Rik	chr10	82623228	82619850	-	chr10:82621101-82625000	3900	31.84	8.57	3.71212	0.000159344	0.0365666	promoter	178
NM_001135568	1190007I07Rik	chr10	82623228	82619850	-	chr10:82621101-82625000	3900	31.84	8.57	3.71212	0.000159344	0.0365666	promoter	178
NM_001114386	Nedd4l	chr18	64887755	65217826	+	chr18:64888701-64890200	1500	8.98	0	899	0.000417779	0.0461418	promoter	1695
NM_026038	L3hypdh	chr12	72085313	72073427	-	chr12:72083701-72087800	4100	35.11	12.25	2.8646	0.000691746	0.0508625	promoter	-437
NM_001205067	Jkamp	chr12	72085838	72101527	+	chr12:72083701-72087800	4100	35.11	12.25	2.8646	0.000691746	0.0508625	promoter	-88
NM_024205	Jkamp	chr12	72085838	72101527	+	chr12:72083701-72087800	4100	35.11	12.25	2.8646	0.000691746	0.0508625	promoter	-88
NM_018868	Nop58	chr1	59685005	59711510	+	chr1:59682801-59684700	1900	16.33	2.45	6.64228	0.000699507	0.0508625	promoter	-1255
NM_178615	Rgmb	chr17	15826586	15806252	-	chr17:15825901-15827300	1400	8.98	0	899	0.000417779	0.0461418	promoter	-14
NM_023371	Pin1	chr9	20652129	20666584	+	chr9:20652801-20654600	1800	10.61	0	1062	0.000125063	0.0322374	promoter	1571
NM_001113562	Cutc	chr19	43753022	43768638	+	chr19:43753101-43755800	2700	16.33	2.45	6.64228	0.000699507	0.0508625	promoter	1428
NM_025530	Cutc	chr19	43753022	43768638	+	chr19:43753101-43755800	2700	16.33	2.45	6.64228	0.000699507	0.0508625	promoter	1428
NM_144874	Cox15	chr19	43753000	43733253	-	chr19:43753101-43755800	2700	16.33	2.45	6.64228	0.000699507	0.0508625	promoter	-1450
NM_177157	Gchfr	chr2	119167787	119172389	+	chr2:119166101-119168000	1900	14.7	1.22	11.9593	0.000246768	0.0389464	promoter	-737
NM_029952	Zfp955a	chr17	33255145	33239506	-	chr17:33253001-33255400	2400	18.78	2.45	7.63821	0.000160448	0.0365666	promoter	945
NM_025400	Nat9	chr11	115187316	115182831	-	chr11:115188501-115190100	1600	10.61	0	1062	0.000125063	0.0322374	promoter	-1984
NM_001033393	Tmem104	chr11	115187486	115247025	+	chr11:115188501-115190100	1600	10.61	0	1062	0.000125063	0.0322374	promoter	1814
NM_011945	Map3k1	chr13	111808983	111746434	-	chr13:111808901-111810500	1600	8.16	0	817	0.000767161	0.0508625	promoter	-717
NM_007705	Cirbp	chr10	80167840	80171653	+	chr10:80166301-80168200	1900	12.25	0	1226	3.78041e-05	0.0217706	promoter	-590
NM_145630	Pdk3	chrX	93832095	93764615	-	chrX:93832101-93836000	3900	28.58	8.57	3.33217	0.000748874	0.0508625	promoter	-1955
NM_001289626	St7	chr6	17693993	17943023	+	chr6:17693501-17695100	1600	11.43	0	1144	6.86875e-05	0.0268853	promoter	307
NM_001289625	St7	chr6	17693993	17943023	+	chr6:17693501-17695100	1600	11.43	0	1144	6.86875e-05	0.0268853	promoter	307
NM_001289624	St7	chr6	17693993	17943023	+	chr6:17693501-17695100	1600	11.43	0	1144	6.86875e-05	0.0268853	promoter	307
NM_146772	Olfr1189	chr2	88591805	88592726	+	chr2:88591801-88593000	1200	8.16	0	817	0.000767161	0.0508625	promoter	595
NM_019490	Uso1	chr5	92137937	92202795	+	chr5:92134901-92137600	2700	21.23	3.67	5.77174	0.000216387	0.0388555	promoter	-1687
NM_178789	Tmem117	chr15	94629184	95096097	+	chr15:94630401-94631800	1400	10.61	0	1062	0.000125063	0.0322374	promoter	1916
NM_172449	Tspoap1	chr11	87760540	87785928	+	chr11:87759101-87762000	2900	22.86	3.67	6.21467	8.50175e-05	0.0303005	promoter	10
NM_001166454	Pls3	chrX	75843021	75785653	-	chrX:75842101-75845700	3600	28.58	8.57	3.33217	0.000748874	0.0508625	promoter	-879
NM_001346520	Pls3	chrX	75843063	75785652	-	chrX:75842101-75845700	3600	28.58	8.57	3.33217	0.000748874	0.0508625	promoter	-837
NR_002926	Pla2g2a	chr4	138831856	138835189	+	chr4:138831201-138832900	1700	10.61	0	1062	0.000125063	0.0322374	promoter	194
NM_001082531	Pla2g2a	chr4	138831875	138835189	+	chr4:138831201-138832900	1700	10.61	0	1062	0.000125063	0.0322374	promoter	175
NR_040456	Gm18853	chr7	105928691	105924334	-	chr7:105929301-105931100	1800	13.06	1.22	10.626	0.000715246	0.0508625	promoter	-1509
NR_040453	Gm17757	chr7	105928691	105924343	-	chr7:105929301-105931100	1800	13.06	1.22	10.626	0.000715246	0.0508625	promoter	-1509
NM_183256	Cox14	chr15	99725617	99728136	+	chr15:99723801-99727100	3300	24.49	3.67	6.65761	3.3015e-05	0.0217706	promoter	-167
NM_001163356	Fam212b	chr3	105705457	105720842	+	chr3:105704101-105707000	2900	22.05	2.45	8.96748	2.17292e-05	0.018268	promoter	93
NM_175398	Fam212b	chr3	105704598	105720842	+	chr3:105704101-105707000	2900	22.05	2.45	8.96748	2.17292e-05	0.018268	promoter	952
NM_025401	Ubl5	chr9	20643317	20646789	+	chr9:20641801-20642900	1100	8.16	0	817	0.000767161	0.0508625	promoter	-967
NM_013911	Fbxl12	chr9	20642806	20637748	-	chr9:20641801-20642900	1100	8.16	0	817	0.000767161	0.0508625	promoter	456
NM_018872	Tmem131	chr1	36939527	36792188	-	chr1:36935301-36940700	5400	46.54	15.92	2.92216	7.51414e-05	0.0286653	promoter	1527
NR_102374	Dmrt1i	chr5	144357922	144361005	+	chr5:144354601-144358100	3500	31.84	9.8	3.24669	0.00045574	0.0484448	promoter	-1572
NM_025833	Baiap2l1	chr5	144358112	144264524	-	chr5:144354601-144358100	3500	31.84	9.8	3.24669	0.00045574	0.0484448	promoter	1762
NM_138667	Tab2	chr10	7956123	7905647	-	chr10:7952801-7956900	4100	28.58	8.57	3.33217	0.000748874	0.0508625	promoter	1273
NM_001289476	Psma7	chr2	180042464	180036366	-	chr2:180042301-180044300	2000	16.33	2.45	6.64228	0.000699507	0.0508625	promoter	-836
NM_011969	Psma7	chr2	180042464	180036366	-	chr2:180042301-180044300	2000	16.33	2.45	6.64228	0.000699507	0.0508625	promoter	-836
NM_178750	Ss18l1	chr2	180042482	180070201	+	chr2:180042301-180044300	2000	16.33	2.45	6.64228	0.000699507	0.0508625	promoter	818
NR_030547	Mir147	chr2	122640802	122640881	+	chr2:122641901-122643100	1200	9.8	0	981	0.000228261	0.0388555	promoter	1698
NM_001013778	Tvp23a	chr16	10447350	10420558	-	chr16:10445301-10446600	1300	8.98	0	899	0.000417779	0.0461418	promoter	1400
NM_011408	Slfn2	chr11	83065111	83070678	+	chr11:83064601-83066200	1600	9.8	0	981	0.000228261	0.0388555	promoter	289
NM_001110809	Gpatch4	chr3	88043105	88055994	+	chr3:88042201-88047700	5500	48.17	20.82	2.31301	0.000841435	0.0508625	promoter	1845
NM_001286857	Gpatch4	chr3	88043105	88055994	+	chr3:88042201-88047700	5500	48.17	20.82	2.31301	0.000841435	0.0508625	promoter	1845
NM_025663	Gpatch4	chr3	88043105	88055994	+	chr3:88042201-88047700	5500	48.17	20.82	2.31301	0.000841435	0.0508625	promoter	1845
NM_178205	Hist1h3e	chr13	23562365	23561895	-	chr13:23559301-23562500	3200	24.49	4.9	4.98982	0.000159121	0.0365666	promoter	1465
NM_001114131	Ppp4r1	chr17	65783354	65841926	+	chr17:65781101-65783000	1900	13.06	0	1307	2.08452e-05	0.018268	promoter	-1304
NM_146081	Ppp4r1	chr17	65783354	65841926	+	chr17:65781101-65783000	1900	13.06	0	1307	2.08452e-05	0.018268	promoter	-1304
NR_104465	Ppp4r1	chr17	65783354	65841926	+	chr17:65781101-65783000	1900	13.06	0	1307	2.08452e-05	0.018268	promoter	-1304
NM_199252	Unc93a	chr17	13131791	13108616	-	chr17:13131701-13133300	1600	11.43	0	1144	6.86875e-05	0.0268853	promoter	-709
NR_028568	Scarna9	chr9	15326330	15326288	-	chr9:15326001-15327100	1100	9.8	0	981	0.000228261	0.0388555	promoter	-220
NM_147221	Glis1	chr4	107434718	107635059	+	chr4:107435901-107437500	1600	9.8	0	981	0.000228261	0.0388555	promoter	1982
NR_134979	4933427D06Rik	chr6	89101017	89110039	+	chr6:89098501-89099600	1100	8.16	0	817	0.000767161	0.0508625	promoter	-1967
NM_001001982	A430105I19Rik	chr2	118762661	118754144	-	chr2:118762401-118765200	2800	19.6	3.67	5.3288	0.000543504	0.0508625	promoter	-1139
NM_177775	Esyt3	chr9	99358530	99309966	-	chr9:99359601-99360700	1100	8.16	0	817	0.000767161	0.0508625	promoter	-1620
NM_001164075	Tgif1	chr17	70851734	70844204	-	chr17:70850101-70851200	1100	8.98	0	899	0.000417779	0.0461418	promoter	1084
NM_001164076	Tgif1	chr17	70849790	70844204	-	chr17:70850101-70851200	1100	8.98	0	899	0.000417779	0.0461418	promoter	-860
NM_009372	Tgif1	chr17	70851210	70844204	-	chr17:70850101-70851200	1100	8.98	0	899	0.000417779	0.0461418	promoter	560
NM_008192	Gucy2e	chr11	69237022	69218116	-	chr11:69236901-69240500	3600	22.05	3.67	5.99457	0.000135845	0.0344171	promoter	-1678
NM_001204910	Ifi207	chr1	173741809	173723427	-	chr1:173741101-173743300	2200	16.33	2.45	6.64228	0.000699507	0.0508625	promoter	-391
NR_037296	Mir3109	chr9	69456943	69457031	+	chr9:69457401-69458700	1300	9.8	0	981	0.000228261	0.0388555	promoter	1107
NM_176959	Fbxl7	chr15	26895564	26540458	-	chr15:26894401-26895900	1500	10.61	0	1062	0.000125063	0.0322374	promoter	414
NM_011281	Rorc	chr3	94372793	94398274	+	chr3:94371201-94373500	2300	16.33	2.45	6.64228	0.000699507	0.0508625	promoter	-443
NM_001005424	Gm996	chr2	25580099	25575415	-	chr2:25579901-25581700	1800	10.61	0	1062	0.000125063	0.0322374	promoter	-701
NR_040392	1700063D05Rik	chr9	41206154	41217627	+	chr9:41204101-41206200	2100	16.33	2.45	6.64228	0.000699507	0.0508625	promoter	-1004
NM_178216	Hist2h3c1	chr3	96246684	96247348	+	chr3:96245001-96251400	6400	55.52	24.49	2.26653	0.000440502	0.0472995	promoter	1516
NM_054045	Hist2h3c2	chr3	96246699	96247348	+	chr3:96245001-96251400	6400	55.52	24.49	2.26653	0.000440502	0.0472995	promoter	1501
NM_175291	Dock10	chr1	80758553	80501067	-	chr1:80758701-80761700	3000	21.23	3.67	5.77174	0.000216387	0.0388555	promoter	-1647
NM_010119	Ehd1	chr19	6276895	6300096	+	chr19:6276501-6277700	1200	8.98	0	899	0.000417779	0.0461418	promoter	205
NM_001311107	Tmcc2	chr1	132390318	132356314	-	chr1:132387901-132390600	2700	19.6	1.22	15.9431	9.81214e-06	0.0145448	promoter	1068
NM_001195271	Tex13c1	chrX	43590988	43593530	+	chrX:43589101-43590300	1200	10.61	0	1062	0.000125063	0.0322374	promoter	-1288
NM_175259	Shisa4	chr1	135375063	135371455	-	chr1:135373201-135377900	4700	38.38	6.12	6.26264	3.35234e-07	0.00363715	promoter	-487
NM_025881	Luc7l	chr17	26252909	26280730	+	chr17:26252301-26257300	5000	36.74	12.25	2.99755	0.000343501	0.0461418	promoter	1891
NR_037905	Luc7l	chr17	26252909	26280730	+	chr17:26252301-26257300	5000	36.74	12.25	2.99755	0.000343501	0.0461418	promoter	1891
NR_037906	Luc7l	chr17	26252909	26280730	+	chr17:26252301-26257300	5000	36.74	12.25	2.99755	0.000343501	0.0461418	promoter	1891
NM_028190	Luc7l	chr17	26252909	26285506	+	chr17:26252301-26257300	5000	36.74	12.25	2.99755	0.000343501	0.0461418	promoter	1891
NM_009518	Wnt10a	chr1	74792018	74804175	+	chr1:74790101-74791900	1800	11.43	0	1144	6.86875e-05	0.0268853	promoter	-1018
NM_001271760	Adra1a	chr14	66635250	66733462	+	chr14:66634901-66636700	1800	11.43	0	1144	6.86875e-05	0.0268853	promoter	550
NM_001271759	Adra1a	chr14	66635250	66733462	+	chr14:66634901-66636700	1800	11.43	0	1144	6.86875e-05	0.0268853	promoter	550
NM_013461	Adra1a	chr14	66635250	66733462	+	chr14:66634901-66636700	1800	11.43	0	1144	6.86875e-05	0.0268853	promoter	550
NM_001271761	Adra1a	chr14	66635250	66771168	+	chr14:66634901-66636700	1800	11.43	0	1144	6.86875e-05	0.0268853	promoter	550
NM_133347	Dhx30	chr9	110115582	110084318	-	chr9:110113801-110116200	2400	16.33	2.45	6.64228	0.000699507	0.0508625	promoter	582
NM_146420	Olfr738	chr14	50413545	50414481	+	chr14:50413901-50415200	1300	8.98	0	899	0.000417779	0.0461418	promoter	1005
NM_001033293	Uap1l1	chr2	25365626	25361491	-	chr2:25364501-25368400	3900	31.03	9.8	3.16412	0.000659609	0.0508625	promoter	-824
NM_010757	Mafk	chr5	139791535	139802652	+	chr5:139789201-139790300	1100	8.16	0	817	0.000767161	0.0508625	promoter	-1785
NR_045038	Zfp207	chr11	80383278	80405873	+	chr11:80382301-80384200	1900	11.43	0	1144	6.86875e-05	0.0268853	promoter	-28
NM_001130170	Zfp207	chr11	80383278	80396248	+	chr11:80382301-80384200	1900	11.43	0	1144	6.86875e-05	0.0268853	promoter	-28
NM_001130169	Zfp207	chr11	80383278	80396248	+	chr11:80382301-80384200	1900	11.43	0	1144	6.86875e-05	0.0268853	promoter	-28
NM_011751	Zfp207	chr11	80383278	80396248	+	chr11:80382301-80384200	1900	11.43	0	1144	6.86875e-05	0.0268853	promoter	-28
NM_001130171	Zfp207	chr11	80383278	80396248	+	chr11:80382301-80384200	1900	11.43	0	1144	6.86875e-05	0.0268853	promoter	-28
NR_046067	Gm2516	chr8	50368111	50416089	+	chr8:50365301-50368400	3100	22.05	4.9	4.49287	0.00059165	0.0508625	promoter	-1261
NM_212473	Fam53b	chr7	132813196	132712083	-	chr7:132813501-132814800	1300	8.16	0	817	0.000767161	0.0508625	promoter	-954
NM_009711	Artn	chr4	117929763	117926159	-	chr4:117927101-117928700	1600	9.8	0	981	0.000228261	0.0388555	promoter	1863
NM_001284192	Artn	chr4	117929763	117926159	-	chr4:117927101-117928700	1600	9.8	0	981	0.000228261	0.0388555	promoter	1863
NM_001284191	Artn	chr4	117929763	117926159	-	chr4:117927101-117928700	1600	9.8	0	981	0.000228261	0.0388555	promoter	1863
NM_001284193	Artn	chr4	117929763	117926159	-	chr4:117927101-117928700	1600	9.8	0	981	0.000228261	0.0388555	promoter	1863
NM_001289571	Sass6	chr3	116594957	116630986	+	chr3:116594401-116597400	3000	23.68	6.12	3.8646	0.000891092	0.0508625	promoter	943
NM_001289568	Sass6	chr3	116594957	116630986	+	chr3:116594401-116597400	3000	23.68	6.12	3.8646	0.000891092	0.0508625	promoter	943
NM_028349	Sass6	chr3	116594957	116630986	+	chr3:116594401-116597400	3000	23.68	6.12	3.8646	0.000891092	0.0508625	promoter	943
NM_178911	Pld4	chr12	112760654	112768986	+	chr12:112758301-112764400	6100	60.42	23.27	2.59579	3.58251e-05	0.0217706	promoter	696
NR_015457	B430010I23Rik	chr8	41017467	41024216	+	chr8:41015101-41019800	4700	43.27	17.15	2.52214	0.000631751	0.0508625	promoter	-17
NM_027878	Dram1	chr10	88357075	88322803	-	chr10:88354201-88356100	1900	14.7	0	1471	6.36798e-06	0.0114397	promoter	1925
NM_008815	Etv4	chr11	101785310	101769747	-	chr11:101784301-101785500	1200	8.98	0	899	0.000417779	0.0461418	promoter	410
NM_001316365	Etv4	chr11	101785310	101769747	-	chr11:101784301-101785500	1200	8.98	0	899	0.000417779	0.0461418	promoter	410
NM_001316366	Etv4	chr11	101785310	101769747	-	chr11:101784301-101785500	1200	8.98	0	899	0.000417779	0.0461418	promoter	410
NM_053173	Kifc5b	chr17	26917090	26932579	+	chr17:26917001-26919600	2600	20.41	3.67	5.54891	0.000343545	0.0461418	promoter	1210
NM_011561	Tdg	chr10	82629837	82650494	+	chr10:82628501-82629700	1200	8.16	0	817	0.000767161	0.0508625	promoter	-737
NM_172552	Tdg	chr10	82629837	82650494	+	chr10:82628501-82629700	1200	8.16	0	817	0.000767161	0.0508625	promoter	-737
NR_037190	Gm9855	chr10	82629841	82650277	+	chr10:82628501-82629700	1200	8.16	0	817	0.000767161	0.0508625	promoter	-741
NM_026080	Mrps24	chr11	5707699	5703982	-	chr11:5706501-5710700	4200	35.93	12.25	2.93148	0.000488415	0.0508625	promoter	-901
NM_026005	2610301B20Rik	chr4	10874497	10899423	+	chr4:10871801-10873600	1800	11.43	0	1144	6.86875e-05	0.0268853	promoter	-1797
NM_029960	9230104L09Rik	chr2	148850934	148846713	-	chr2:148850501-148853400	2900	18.78	3.67	5.10598	0.000856604	0.0508625	promoter	-1016
NM_001289443	Tnk2	chr16	32673153	32683493	+	chr16:32670301-32672200	1900	13.06	1.22	10.626	0.000715246	0.0508625	promoter	-1903
NM_001347185	Tnk2	chr16	32673153	32683493	+	chr16:32670301-32672200	1900	13.06	1.22	10.626	0.000715246	0.0508625	promoter	-1903
NR_045817	1500015L24Rik	chr19	20405287	20422785	+	chr19:20406101-20407500	1400	9.8	0	981	0.000228261	0.0388555	promoter	1513
NR_046184	4930447K03Rik	chr13	34113272	34084154	-	chr13:34110701-34114400	3700	28.58	3.67	7.76902	2.97177e-06	0.00958685	promoter	722
NM_008521	Ltc4s	chr11	50238532	50236460	-	chr11:50235601-50241800	6200	46.54	14.7	3.16451	3.02887e-05	0.0217706	promoter	-168
NR_132733	Ltc4s	chr11	50238532	50236460	-	chr11:50235601-50241800	6200	46.54	14.7	3.16451	3.02887e-05	0.0217706	promoter	-168
NR_132732	Ltc4s	chr11	50238532	50236460	-	chr11:50235601-50241800	6200	46.54	14.7	3.16451	3.02887e-05	0.0217706	promoter	-168
NM_001313968	Ltc4s	chr11	50238532	50236460	-	chr11:50235601-50241800	6200	46.54	14.7	3.16451	3.02887e-05	0.0217706	promoter	-168
NM_001301868	Ikzf1	chr11	11685924	11772926	+	chr11:11684201-11687300	3100	24.49	3.67	6.65761	3.3015e-05	0.0217706	promoter	-174
NM_009578	Ikzf1	chr11	11685924	11772926	+	chr11:11684201-11687300	3100	24.49	3.67	6.65761	3.3015e-05	0.0217706	promoter	-174
NM_001025597	Ikzf1	chr11	11685924	11772926	+	chr11:11684201-11687300	3100	24.49	3.67	6.65761	3.3015e-05	0.0217706	promoter	-174
NM_001177621	Slc5a6	chr5	31048562	31036035	-	chr5:31049601-31050600	1000	8.16	0	817	0.000767161	0.0508625	promoter	-1538
NM_001177622	Slc5a6	chr5	31048924	31036035	-	chr5:31049601-31050600	1000	8.16	0	817	0.000767161	0.0508625	promoter	-1176
NM_027855	Atraid	chr5	31048639	31054633	+	chr5:31049601-31050600	1000	8.16	0	817	0.000767161	0.0508625	promoter	1461
NM_212470	Atraid	chr5	31048639	31054633	+	chr5:31049601-31050600	1000	8.16	0	817	0.000767161	0.0508625	promoter	1461
NM_020579	B4galt3	chr1	171270327	171276895	+	chr1:171269701-171271600	1900	14.7	1.22	11.9593	0.000246768	0.0389464	promoter	323
NR_028547	Snord110	chr2	130275514	130275573	+	chr2:130274901-130276900	2000	16.33	1.22	13.2846	8.4628e-05	0.0303005	promoter	386
NM_024193	Nop56	chr2	130274411	130279313	+	chr2:130274901-130276900	2000	16.33	1.22	13.2846	8.4628e-05	0.0303005	promoter	1489
NM_026404	Slc35a4	chr18	36679214	36683862	+	chr18:36677001-36678600	1600	9.8	0	981	0.000228261	0.0388555	promoter	-1414
NM_001083317	Slc35a4	chr18	36679214	36683862	+	chr18:36677001-36678600	1600	9.8	0	981	0.000228261	0.0388555	promoter	-1414
NM_146085	Apbb3	chr18	36679366	36671158	-	chr18:36677001-36678600	1600	9.8	0	981	0.000228261	0.0388555	promoter	1566
NM_001166597	Dgkz	chr2	91950348	91932826	-	chr2:91950801-91952700	1900	13.88	1.22	11.2927	0.000420465	0.0461418	promoter	-1402
NM_025843	Ndufb7	chr8	83566757	83571623	+	chr8:83566001-83569400	3400	26.13	6.12	4.26427	0.000257169	0.0398887	promoter	943
NM_021462	Mknk2	chr10	80676293	80665317	-	chr10:80674301-80675800	1500	8.16	0	817	0.000767161	0.0508625	promoter	1243
NM_019496	Ammecr1	chrX	142966728	142853473	-	chrX:142967301-142968400	1100	8.16	0	817	0.000767161	0.0508625	promoter	-1122
NM_001099637	Cep170	chr1	176807124	176733652	-	chr1:176806901-176810500	3600	31.84	8.57	3.71212	0.000159344	0.0365666	promoter	-1576
NM_009362	Tff1	chr17	31165053	31161395	-	chr17:31165001-31167000	2000	14.7	1.22	11.9593	0.000246768	0.0389464	promoter	-947
NM_019576	Thsd1	chr8	22227302	22261332	+	chr8:22226501-22227800	1300	8.16	0	817	0.000767161	0.0508625	promoter	-152
NM_001205253	Thsd1	chr8	22227302	22261332	+	chr8:22226501-22227800	1300	8.16	0	817	0.000767161	0.0508625	promoter	-152
NM_001293688	Thsd1	chr8	22227302	22261332	+	chr8:22226501-22227800	1300	8.16	0	817	0.000767161	0.0508625	promoter	-152
NM_147121	Olfr644	chr7	104069029	104068084	-	chr7:104067001-104069000	2000	16.33	2.45	6.64228	0.000699507	0.0508625	promoter	1029
NM_001034871	Clpsl2	chr17	28549486	28552618	+	chr17:28547401-28548800	1400	8.16	0	817	0.000767161	0.0508625	promoter	-1386
NM_020015	Magea1	chrX	155089790	155088518	-	chrX:155088201-155091500	3300	26.13	4.9	5.32383	6.51454e-05	0.0268853	promoter	-60
NM_001037294	Alpk2	chr18	65393888	65265530	-	chr18:65392701-65394200	1500	8.16	0	817	0.000767161	0.0508625	promoter	438
NM_178215	Hist2h3b	chr3	96268653	96269155	+	chr3:96266001-96272200	6200	53.89	22.05	2.44334	0.000206004	0.0388555	promoter	447
NM_175666	Hist2h2bb	chr3	96269699	96270192	+	chr3:96266001-96272200	6200	53.89	22.05	2.44334	0.000206004	0.0388555	promoter	-599
NM_172709	Otop1	chr5	38277403	38304217	+	chr5:38278401-38280100	1700	12.25	0	1226	3.78041e-05	0.0217706	promoter	1847
NM_028995	Nipal3	chr4	135494504	135448900	-	chr4:135494301-135496200	1900	13.06	0	1307	2.08452e-05	0.018268	promoter	-746
NM_001347220	Nipal3	chr4	135494578	135447130	-	chr4:135494301-135496200	1900	13.06	0	1307	2.08452e-05	0.018268	promoter	-672
NM_030189	Stpg1	chr4	135495986	135537803	+	chr4:135494301-135496200	1900	13.06	0	1307	2.08452e-05	0.018268	promoter	-736
NM_027498	Sik3	chr9	46012819	46224194	+	chr9:46011001-46012100	1100	8.16	0	817	0.000767161	0.0508625	promoter	-1269
NM_001163542	Plec	chr15	76231378	76170973	-	chr15:76229501-76234400	4900	47.36	13.47	3.51409	7.75333e-06	0.0132544	promoter	-572
NM_011117	Plec	chr15	76231378	76170973	-	chr15:76229501-76234400	4900	47.36	13.47	3.51409	7.75333e-06	0.0132544	promoter	-572
NM_001166735	Vmn1r224	chr17	20419162	20420059	+	chr17:20416501-20418000	1500	9.8	0	981	0.000228261	0.0388555	promoter	-1912
NM_001081118	Phrf1	chr7	141228787	141262751	+	chr7:141227801-141229500	1700	10.61	0	1062	0.000125063	0.0322374	promoter	-137
NM_022027	Syne1	chr10	5069063	5020195	-	chr10:5070001-5072000	2000	14.7	0	1471	6.36798e-06	0.0114397	promoter	-1937
NM_031186	Ndst3	chr3	123672477	123526165	-	chr3:123669801-123671200	1400	8.98	0	899	0.000417779	0.0461418	promoter	1977
NM_011968	Psma6	chr12	55398824	55418459	+	chr12:55398401-55402000	3600	31.03	9.8	3.16412	0.000659609	0.0508625	promoter	1376
NM_029035	Spsb1	chr4	149955006	149896283	-	chr4:149953401-149955300	1900	13.06	1.22	10.626	0.000715246	0.0508625	promoter	656
NM_144534	Tmem38a	chr8	72572102	72587284	+	chr8:72569801-72575100	5300	42.46	17.15	2.47494	0.000864406	0.0508625	promoter	348
NM_172396	Smim7	chr8	72571048	72565197	-	chr8:72569801-72575100	5300	42.46	17.15	2.47494	0.000864406	0.0508625	promoter	-1402
NM_133816	Sh3bp4	chr1	89070461	89153793	+	chr1:89071601-89073300	1700	10.61	0	1062	0.000125063	0.0322374	promoter	1989
NM_001033173	Usp31	chr7	121707253	121642020	-	chr7:121707101-121709100	2000	16.33	2.45	6.64228	0.000699507	0.0508625	promoter	-847
NR_045074	A330102I10Rik	chr13	29016254	29040336	+	chr13:29017001-29018800	1800	11.43	0	1144	6.86875e-05	0.0268853	promoter	1646
NR_045073	A330102I10Rik	chr13	29016254	29040336	+	chr13:29017001-29018800	1800	11.43	0	1144	6.86875e-05	0.0268853	promoter	1646
NR_045075	A330102I10Rik	chr13	29016254	29028804	+	chr13:29017001-29018800	1800	11.43	0	1144	6.86875e-05	0.0268853	promoter	1646
NM_001122685	Rhbdd1	chr1	82339048	82445367	+	chr1:82337401-82338700	1300	8.16	0	817	0.000767161	0.0508625	promoter	-998
NM_030094	Nudt17	chr3	96708560	96705891	-	chr3:96705901-96709200	3300	24.49	6.12	3.99674	0.000591303	0.0508625	promoter	1010
NM_001162925	Nudt17	chr3	96708560	96705891	-	chr3:96705901-96709200	3300	24.49	6.12	3.99674	0.000591303	0.0508625	promoter	1010
NM_026931	1810011O10Rik	chr8	24438946	24437615	-	chr8:24436201-24438300	2100	18.78	3.67	5.10598	0.000856604	0.0508625	promoter	1696
NM_033374	Dock2	chr11	34783905	34226820	-	chr11:34782401-34784000	1600	9.8	0	981	0.000228261	0.0388555	promoter	705
NM_009976	Cst3	chr2	148875512	148871721	-	chr2:148874301-148875900	1600	9.8	0	981	0.000228261	0.0388555	promoter	412
NM_207572	Olfr1535	chr13	21556020	21555039	-	chr13:21555501-21558200	2700	18.78	3.67	5.10598	0.000856604	0.0508625	promoter	-830
NM_028851	1700080O16Rik	chrX	51972772	51968694	-	chrX:51971801-51973700	1900	13.06	1.22	10.626	0.000715246	0.0508625	promoter	22
NM_028617	Mvb12a	chr8	71542929	71548026	+	chr8:71541601-71544300	2700	22.05	1.22	17.935	1.93046e-06	0.00720704	promoter	21
NM_024254	Katnbl1	chr2	112379210	112414237	+	chr2:112379301-112382200	2900	24.49	4.9	4.98982	0.000159121	0.0365666	promoter	1540
NM_026597	Fam212a	chr9	107985916	107984223	-	chr9:107985501-107987300	1800	13.06	0	1307	2.08452e-05	0.018268	promoter	-484
NM_201529	Lmo7	chr14	101729927	101934693	+	chr14:101730801-101732700	1900	13.06	0	1307	2.08452e-05	0.018268	promoter	1823
NM_133795	Ttc1	chr11	43747973	43730005	-	chr11:43746301-43747300	1000	8.16	0	817	0.000767161	0.0508625	promoter	1173
NM_008465	Kpna1	chr16	35983362	36036162	+	chr16:35979901-35983200	3300	22.86	4.9	4.65784	0.000383349	0.0461418	promoter	-1812
NM_133197	Mcf2	chrX	60147700	60055955	-	chrX:60146801-60148400	1600	10.61	0	1062	0.000125063	0.0322374	promoter	100
NM_001289730	Mcf2	chrX	60147700	60055955	-	chrX:60146801-60148400	1600	10.61	0	1062	0.000125063	0.0322374	promoter	100
NM_175656	Hist1h4i	chr13	22041362	22040959	-	chr13:22039501-22041400	1900	13.88	1.22	11.2927	0.000420465	0.0461418	promoter	912
NM_011074	Cdk14	chr5	5380251	4803383	-	chr5:5381101-5383200	2100	16.33	2.45	6.64228	0.000699507	0.0508625	promoter	-1899
NM_013888	Dnajc12	chr10	63386562	63408840	+	chr10:63385601-63387500	1900	12.25	0	1226	3.78041e-05	0.0217706	promoter	-12
NR_028449	Hdac10	chr15	89128700	89123302	-	chr15:89127301-89128600	1300	8.16	0	817	0.000767161	0.0508625	promoter	750
NR_028448	Hdac10	chr15	89128700	89123302	-	chr15:89127301-89128600	1300	8.16	0	817	0.000767161	0.0508625	promoter	750
NR_028447	Hdac10	chr15	89128700	89123302	-	chr15:89127301-89128600	1300	8.16	0	817	0.000767161	0.0508625	promoter	750
NM_199198	Hdac10	chr15	89128700	89123302	-	chr15:89127301-89128600	1300	8.16	0	817	0.000767161	0.0508625	promoter	750
NM_001290540	Pdzd4	chrX	73824969	73793356	-	chrX:73825401-73827900	2500	17.96	2.45	7.30488	0.000262875	0.0399562	promoter	-1681
NM_001029868	Pdzd4	chrX	73824969	73793356	-	chrX:73825401-73827900	2500	17.96	2.45	7.30488	0.000262875	0.0399562	promoter	-1681
NR_015586	A330035P11Rik	chr14	122106974	122097938	-	chr14:122105401-122107400	2000	15.51	0	1552	3.52689e-06	0.00958685	promoter	574
NM_080556	Tm9sf2	chr14	122107081	122159603	+	chr14:122105401-122107400	2000	15.51	0	1552	3.52689e-06	0.00958685	promoter	-681
NM_175460	Nmnat2	chr1	152955100	153119261	+	chr1:152955701-152956900	1200	8.98	0	899	0.000417779	0.0461418	promoter	1200
NM_001289895	Tns1	chr1	74124449	73910230	-	chr1:74122701-74124000	1300	8.16	0	817	0.000767161	0.0508625	promoter	1099
NM_027884	Tns1	chr1	74124447	73910230	-	chr1:74122701-74124000	1300	8.16	0	817	0.000767161	0.0508625	promoter	1097
NM_001289788	Slc26a5	chr5	21862006	21809000	-	chr5:21861201-21862500	1300	8.98	0	899	0.000417779	0.0461418	promoter	156
NM_001289787	Slc26a5	chr5	21862006	21809000	-	chr5:21861201-21862500	1300	8.98	0	899	0.000417779	0.0461418	promoter	156
NM_001163456	Cox18	chr5	90223996	90214724	-	chr5:90222301-90224100	1800	13.06	1.22	10.626	0.000715246	0.0508625	promoter	796
NM_001033310	Cox18	chr5	90223996	90214724	-	chr5:90222301-90224100	1800	13.06	1.22	10.626	0.000715246	0.0508625	promoter	796
NR_028088	Cox18	chr5	90223996	90214724	-	chr5:90222301-90224100	1800	13.06	1.22	10.626	0.000715246	0.0508625	promoter	796
NM_001204820	Myadml2	chr11	120648337	120646030	-	chr11:120646301-120648100	1800	12.25	0	1226	3.78041e-05	0.0217706	promoter	1137
NM_026751	Myadml2	chr11	120648337	120646030	-	chr11:120646301-120648100	1800	12.25	0	1226	3.78041e-05	0.0217706	promoter	1137
NM_013482	Btk	chrX	134583140	134542340	-	chrX:134581701-134584600	2900	22.86	3.67	6.21467	8.50175e-05	0.0303005	promoter	-10
NM_001002241	Tdrd1	chr19	56830711	56870012	+	chr19:56828301-56829500	1200	8.16	0	817	0.000767161	0.0508625	promoter	-1811
NM_001013367	Prkaa1	chr15	5143860	5181899	+	chr15:5141001-5144300	3300	27.76	6.12	4.53018	0.00011017	0.0322374	promoter	-1210
NM_001290822	Pdpn	chr4	143299564	143267408	-	chr4:143299501-143301400	1900	13.06	1.22	10.626	0.000715246	0.0508625	promoter	-886
NM_010329	Pdpn	chr4	143299564	143267408	-	chr4:143299501-143301400	1900	13.06	1.22	10.626	0.000715246	0.0508625	promoter	-886
NM_008444	Kif3b	chr2	153291415	153333389	+	chr2:153287601-153291900	4300	33.48	11.02	3.03626	0.000571211	0.0508625	promoter	-1665
NM_033320	Glce	chr9	62070606	62057248	-	chr9:62071001-62073400	2400	17.15	2.45	6.97561	0.000429473	0.0461418	promoter	-1594
NR_126562	AV064505	chr9	7695631	7669428	-	chr9:7695701-7697400	1700	10.61	0	1062	0.000125063	0.0322374	promoter	-919
NM_146115	Tor4a	chr2	25196813	25192719	-	chr2:25194001-25196600	2600	18.78	1.22	15.2764	1.68413e-05	0.018268	promoter	1513
NM_011179	Psap	chr10	60277627	60302600	+	chr10:60275401-60279700	4300	32.66	11.02	2.96192	0.000815585	0.0508625	promoter	-77
NM_001146122	Psap	chr10	60277627	60302600	+	chr10:60275401-60279700	4300	32.66	11.02	2.96192	0.000815585	0.0508625	promoter	-77
NM_001146120	Psap	chr10	60277627	60302600	+	chr10:60275401-60279700	4300	32.66	11.02	2.96192	0.000815585	0.0508625	promoter	-77
NM_001146123	Psap	chr10	60277627	60302600	+	chr10:60275401-60279700	4300	32.66	11.02	2.96192	0.000815585	0.0508625	promoter	-77
NM_001146121	Psap	chr10	60277627	60302600	+	chr10:60275401-60279700	4300	32.66	11.02	2.96192	0.000815585	0.0508625	promoter	-77
NR_002847	Malat1	chr19	5802672	5795689	-	chr19:5801601-5804300	2700	19.6	1.22	15.9431	9.81214e-06	0.0145448	promoter	-278
NM_019914	Mllt11	chr3	95228677	95218543	-	chr3:95223901-95232600	8700	73.48	34.29	2.14257	0.000134079	0.0343714	promoter	427
NM_001038708	Cdc42se1	chr3	95228942	95236424	+	chr3:95223901-95232600	8700	73.48	34.29	2.14257	0.000134079	0.0343714	promoter	-692
NM_172395	Cdc42se1	chr3	95228423	95236424	+	chr3:95223901-95232600	8700	73.48	34.29	2.14257	0.000134079	0.0343714	promoter	-173
NM_007951	Erh	chr12	80644111	80634020	-	chr12:80639601-80647300	7700	71.85	31.84	2.2562	6.87815e-05	0.0269108	promoter	661
NM_001347409	Erh	chr12	80644111	80634020	-	chr12:80639601-80647300	7700	71.85	31.84	2.2562	6.87815e-05	0.0269108	promoter	661
NM_026244	Slc39a9	chr12	80644214	80683342	+	chr12:80639601-80647300	7700	71.85	31.84	2.2562	6.87815e-05	0.0269108	promoter	-764
NR_033173	Krit1	chr5	3803180	3844515	+	chr5:3802501-3803900	1400	8.98	0	899	0.000417779	0.0461418	promoter	20
NM_001289527	Ankib1	chr5	3803124	3689998	-	chr5:3802501-3803900	1400	8.98	0	899	0.000417779	0.0461418	promoter	-76
NM_001289528	Ankib1	chr5	3803124	3689998	-	chr5:3802501-3803900	1400	8.98	0	899	0.000417779	0.0461418	promoter	-76
NM_001003909	Ankib1	chr5	3803124	3689998	-	chr5:3802501-3803900	1400	8.98	0	899	0.000417779	0.0461418	promoter	-76
NM_001170552	Krit1	chr5	3803164	3844515	+	chr5:3802501-3803900	1400	8.98	0	899	0.000417779	0.0461418	promoter	36
NM_030675	Krit1	chr5	3803164	3844515	+	chr5:3802501-3803900	1400	8.98	0	899	0.000417779	0.0461418	promoter	36
NM_146996	Olfr177	chr16	58873148	58872218	-	chr16:58872301-58873800	1500	10.61	0	1062	0.000125063	0.0322374	promoter	98
NM_146993	Olfr176	chr16	58873148	58872214	-	chr16:58872301-58873800	1500	10.61	0	1062	0.000125063	0.0322374	promoter	98
NR_038017	Gm15915	chr10	93683322	93674217	-	chr10:93684401-93685800	1400	8.98	0	899	0.000417779	0.0461418	promoter	-1778
NM_024282	Desi2	chr1	178187416	178252597	+	chr1:178185401-178187000	1600	9.8	0	981	0.000228261	0.0388555	promoter	-1216
NM_178206	Hist1h3h	chr13	21717627	21718115	+	chr13:21714701-21719600	4900	52.26	18.37	2.84385	3.84554e-05	0.0220799	promoter	-477
NM_178182	Hist1h2ai	chr13	21716411	21716859	+	chr13:21714701-21719600	4900	52.26	18.37	2.84385	3.84554e-05	0.0220799	promoter	739
NM_178199	Hist1h2bl	chr13	21716143	21715712	-	chr13:21714701-21719600	4900	52.26	18.37	2.84385	3.84554e-05	0.0220799	promoter	-1007
NM_001177533	Apol11a	chr15	77508270	77517319	+	chr15:77508601-77510100	1500	8.98	0	899	0.000417779	0.0461418	promoter	1080
NM_001330423	Fastkd3	chr13	68582209	68592338	+	chr13:68579001-68582800	3800	35.11	12.25	2.8646	0.000691746	0.0508625	promoter	-1309
NM_027123	Fastkd3	chr13	68582209	68592338	+	chr13:68579001-68582800	3800	35.11	12.25	2.8646	0.000691746	0.0508625	promoter	-1309
NR_138477	Fastkd3	chr13	68582209	68592338	+	chr13:68579001-68582800	3800	35.11	12.25	2.8646	0.000691746	0.0508625	promoter	-1309
NR_138478	Fastkd3	chr13	68582209	68592338	+	chr13:68579001-68582800	3800	35.11	12.25	2.8646	0.000691746	0.0508625	promoter	-1309
NM_172480	Mtrr	chr13	68582169	68560779	-	chr13:68579001-68582800	3800	35.11	12.25	2.8646	0.000691746	0.0508625	promoter	1269
NR_131892	Mtrr	chr13	68582169	68560779	-	chr13:68579001-68582800	3800	35.11	12.25	2.8646	0.000691746	0.0508625	promoter	1269
NM_001308475	Mtrr	chr13	68582104	68560779	-	chr13:68579001-68582800	3800	35.11	12.25	2.8646	0.000691746	0.0508625	promoter	1204
NM_001033632	Ifitm6	chr7	141016892	141015811	-	chr7:141017001-141018800	1800	11.43	0	1144	6.86875e-05	0.0268853	promoter	-1008
NM_022989	Arl6ip6	chr2	53192083	53219221	+	chr2:53190901-53193600	2700	18.78	2.45	7.63821	0.000160448	0.0365666	promoter	167
NM_018785	Prpf40a	chr2	53191187	53138475	-	chr2:53190901-53193600	2700	18.78	2.45	7.63821	0.000160448	0.0365666	promoter	-1063
NM_172277	Snx8	chr5	140389308	140340292	-	chr5:140388301-140390800	2500	18.78	2.45	7.63821	0.000160448	0.0365666	promoter	-242
NM_153805	Pkn3	chr2	30078765	30091019	+	chr2:30075201-30079900	4700	39.19	11.02	3.55394	4.24779e-05	0.023858	promoter	-1215
NM_025318	Emc6	chr11	73177042	73175502	-	chr11:73174801-73177400	2600	18.78	2.45	7.63821	0.000160448	0.0365666	promoter	942
NM_001168470	Emc6	chr11	73177008	73175502	-	chr11:73174801-73177400	2600	18.78	2.45	7.63821	0.000160448	0.0365666	promoter	908
NM_029564	Tax1bp3	chr11	73177082	73182046	+	chr11:73174801-73177400	2600	18.78	2.45	7.63821	0.000160448	0.0365666	promoter	-982
NR_015467	5530601H04Rik	chrX	105070124	105040853	-	chrX:105070201-105072900	2700	23.68	6.12	3.8646	0.000891092	0.0508625	promoter	-1426
NR_003368	Pvt1	chr15	62037985	62250976	+	chr15:62038201-62039900	1700	11.43	0	1144	6.86875e-05	0.0268853	promoter	1065
NR_132746	Pvt1	chr15	62039256	62250976	+	chr15:62038201-62039900	1700	11.43	0	1144	6.86875e-05	0.0268853	promoter	-206
NR_132747	Pvt1	chr15	62037985	62260212	+	chr15:62038201-62039900	1700	11.43	0	1144	6.86875e-05	0.0268853	promoter	1065
NM_001252538	Ciz1	chr2	32363009	32378313	+	chr2:32359201-32365000	5800	52.26	19.6	2.66548	8.67941e-05	0.03091	promoter	-909
NM_001252536	Ciz1	chr2	32363009	32378313	+	chr2:32359201-32365000	5800	52.26	19.6	2.66548	8.67941e-05	0.03091	promoter	-909
NM_028412	Ciz1	chr2	32363197	32378313	+	chr2:32359201-32365000	5800	52.26	19.6	2.66548	8.67941e-05	0.03091	promoter	-1097
NM_001252537	Ciz1	chr2	32363197	32378313	+	chr2:32359201-32365000	5800	52.26	19.6	2.66548	8.67941e-05	0.03091	promoter	-1097
NM_001252534	Ciz1	chr2	32363197	32378313	+	chr2:32359201-32365000	5800	52.26	19.6	2.66548	8.67941e-05	0.03091	promoter	-1097
NM_011052	Pdcd6ip	chr9	113708259	113651743	-	chr9:113708801-113710700	1900	12.25	0	1226	3.78041e-05	0.0217706	promoter	-1491
NM_001164678	Pdcd6ip	chr9	113708259	113651743	-	chr9:113708801-113710700	1900	12.25	0	1226	3.78041e-05	0.0217706	promoter	-1491
NM_001164677	Pdcd6ip	chr9	113708259	113651743	-	chr9:113708801-113710700	1900	12.25	0	1226	3.78041e-05	0.0217706	promoter	-1491
NM_028774	Rnf6	chr5	146221457	146209193	-	chr5:146221001-146225200	4200	34.29	12.25	2.79772	0.000975748	0.0508625	promoter	-1643
NM_011381	Six3	chr17	85620833	85626191	+	chr17:85621901-85623100	1200	8.98	0	899	0.000417779	0.0461418	promoter	1667
NM_199471	Prss43	chr9	110826689	110831504	+	chr9:110825101-110826900	1800	13.06	1.22	10.626	0.000715246	0.0508625	promoter	-689
NM_001042630	Lcn5	chr2	25657951	25662230	+	chr2:25657601-25659900	2300	17.15	0	1716	1.08562e-06	0.00577456	promoter	799
NM_007947	Lcn5	chr2	25657951	25661645	+	chr2:25657601-25659900	2300	17.15	0	1716	1.08562e-06	0.00577456	promoter	799
NM_001276257	Lcn5	chr2	25657951	25661645	+	chr2:25657601-25659900	2300	17.15	0	1716	1.08562e-06	0.00577456	promoter	799
NR_037241	Mir3080	chr15	82959296	82959217	-	chr15:82959901-82961100	1200	8.16	0	817	0.000767161	0.0508625	promoter	-1204
NM_028083	Chaf1b	chr16	93883900	93906106	+	chr16:93882101-93884400	2300	16.33	2.45	6.64228	0.000699507	0.0508625	promoter	-650
NR_040333	A230108P19Rik	chr2	6193250	6321611	+	chr2:6192701-6193700	1000	8.16	0	817	0.000767161	0.0508625	promoter	-50
NM_009071	Rock1	chr18	10181792	10064400	-	chr18:10181201-10183100	1900	13.88	1.22	11.2927	0.000420465	0.0461418	promoter	-358
NM_028427	Tmem192	chr8	64947184	64969037	+	chr8:64945701-64950200	4500	40.82	14.7	2.77566	0.000347541	0.0461418	promoter	766
NM_001163747	Tmem192	chr8	64947184	64969037	+	chr8:64945701-64950200	4500	40.82	14.7	2.77566	0.000347541	0.0461418	promoter	766
NM_001301374	Coro1a	chr7	126704220	126699773	-	chr7:126701901-126704300	2400	18.78	2.45	7.63821	0.000160448	0.0365666	promoter	1120
NM_009898	Coro1a	chr7	126704816	126699773	-	chr7:126701901-126704300	2400	18.78	2.45	7.63821	0.000160448	0.0365666	promoter	1716
NM_001080940	Angptl8	chr9	21835509	21837347	+	chr9:21835101-21836700	1600	9.8	0	981	0.000228261	0.0388555	promoter	391
NM_133902	Sdsl	chr5	120472763	120458201	-	chr5:120472101-120473400	1300	8.98	0	899	0.000417779	0.0461418	promoter	13
NM_001045543	Heatr9	chr11	83522099	83511678	-	chr11:83519801-83523600	3800	28.58	6.12	4.66395	7.17334e-05	0.0277024	promoter	399
NM_198424	Orai3	chr7	127769814	127775150	+	chr7:127769701-127771000	1300	9.8	0	981	0.000228261	0.0388555	promoter	536
NM_145505	Fam160b1	chr19	57361008	57389594	+	chr19:57362101-57363700	1600	10.61	0	1062	0.000125063	0.0322374	promoter	1892
NM_175201	Rnf38	chr4	44167538	44126211	-	chr4:44165701-44167200	1500	8.98	0	899	0.000417779	0.0461418	promoter	1088
NM_001038993	Rnf38	chr4	44168283	44126211	-	chr4:44165701-44167200	1500	8.98	0	899	0.000417779	0.0461418	promoter	1833
NM_001271747	Dnmt3b	chr2	153649448	153687730	+	chr2:153648101-153650000	1900	13.88	1.22	11.2927	0.000420465	0.0461418	promoter	-398
NM_001271745	Dnmt3b	chr2	153649448	153687730	+	chr2:153648101-153650000	1900	13.88	1.22	11.2927	0.000420465	0.0461418	promoter	-398
NM_001271744	Dnmt3b	chr2	153649448	153687730	+	chr2:153648101-153650000	1900	13.88	1.22	11.2927	0.000420465	0.0461418	promoter	-398
NM_001122997	Dnmt3b	chr2	153649448	153687730	+	chr2:153648101-153650000	1900	13.88	1.22	11.2927	0.000420465	0.0461418	promoter	-398
NM_010068	Dnmt3b	chr2	153649448	153687730	+	chr2:153648101-153650000	1900	13.88	1.22	11.2927	0.000420465	0.0461418	promoter	-398
NM_001271746	Dnmt3b	chr2	153649448	153687730	+	chr2:153648101-153650000	1900	13.88	1.22	11.2927	0.000420465	0.0461418	promoter	-398
NM_001003963	Dnmt3b	chr2	153649448	153687730	+	chr2:153648101-153650000	1900	13.88	1.22	11.2927	0.000420465	0.0461418	promoter	-398
NM_001003961	Dnmt3b	chr2	153649448	153687730	+	chr2:153648101-153650000	1900	13.88	1.22	11.2927	0.000420465	0.0461418	promoter	-398
NM_001003960	Dnmt3b	chr2	153649448	153687730	+	chr2:153648101-153650000	1900	13.88	1.22	11.2927	0.000420465	0.0461418	promoter	-398
NM_026740	Slc46a1	chr11	78465700	78471945	+	chr11:78464901-78466200	1300	8.98	0	899	0.000417779	0.0461418	promoter	-150
NM_173757	Mrps27	chr13	99344785	99415561	+	chr13:99344001-99349500	5500	42.46	11.02	3.85041	8.95161e-06	0.0142911	promoter	1965
NM_146107	Actr1b	chr1	36709925	36699201	-	chr1:36708101-36712600	4500	35.93	8.57	4.18881	2.1242e-05	0.018268	promoter	-425
NM_001170632	Fcamr	chr1	130800901	130814740	+	chr1:130798501-130799500	1000	8.16	0	817	0.000767161	0.0508625	promoter	-1901
NM_144960	Fcamr	chr1	130800901	130814740	+	chr1:130798501-130799500	1000	8.16	0	817	0.000767161	0.0508625	promoter	-1901
NM_026110	Paxbp1	chr16	91044379	91014036	-	chr16:91042701-91045100	2400	23.68	6.12	3.8646	0.000891092	0.0508625	promoter	479
NM_001286021	Csn2	chr5	87699425	87692618	-	chr5:87696801-87698100	1300	9.8	0	981	0.000228261	0.0388555	promoter	1975
NM_001286023	Csn2	chr5	87699425	87692618	-	chr5:87696801-87698100	1300	9.8	0	981	0.000228261	0.0388555	promoter	1975
NM_001286022	Csn2	chr5	87699425	87692618	-	chr5:87696801-87698100	1300	9.8	0	981	0.000228261	0.0388555	promoter	1975
NM_009972	Csn2	chr5	87699425	87692618	-	chr5:87696801-87698100	1300	9.8	0	981	0.000228261	0.0388555	promoter	1975
NM_001286020	Csn2	chr5	87699425	87692618	-	chr5:87696801-87698100	1300	9.8	0	981	0.000228261	0.0388555	promoter	1975
NM_001286024	Csn2	chr5	87699425	87692618	-	chr5:87696801-87698100	1300	9.8	0	981	0.000228261	0.0388555	promoter	1975
NM_146122	Dennd1a	chr2	38287384	37798989	-	chr2:38287501-38289500	2000	14.7	1.22	11.9593	0.000246768	0.0389464	promoter	-1116
NM_019965	Dnajb12	chr10	59879590	59898016	+	chr10:59878901-59881000	2100	14.7	1.22	11.9593	0.000246768	0.0389464	promoter	360
NM_009424	Traf6	chr2	101678419	101701668	+	chr2:101675601-101677600	2000	14.7	1.22	11.9593	0.000246768	0.0389464	promoter	-1819
NM_001303273	Traf6	chr2	101678419	101701668	+	chr2:101675601-101677600	2000	14.7	1.22	11.9593	0.000246768	0.0389464	promoter	-1819
NM_001033283	Oosp3	chr19	11697054	11711858	+	chr19:11697001-11698000	1000	8.16	0	817	0.000767161	0.0508625	promoter	446
NM_025524	Krtap3-3	chr11	99550863	99550131	-	chr11:99549501-99551100	1600	10.61	0	1062	0.000125063	0.0322374	promoter	563
NM_001111078	Uhrf1	chr17	56304312	56323486	+	chr17:56301401-56303500	2100	14.7	1.22	11.9593	0.000246768	0.0389464	promoter	-1862
NM_001111080	Uhrf1	chr17	56304312	56323486	+	chr17:56301401-56303500	2100	14.7	1.22	11.9593	0.000246768	0.0389464	promoter	-1862
NM_001111079	Uhrf1	chr17	56303336	56323486	+	chr17:56301401-56303500	2100	14.7	1.22	11.9593	0.000246768	0.0389464	promoter	-886
NM_010931	Uhrf1	chr17	56303336	56323486	+	chr17:56301401-56303500	2100	14.7	1.22	11.9593	0.000246768	0.0389464	promoter	-886
NM_029157	Sf3a3	chr4	124714860	124732422	+	chr4:124715601-124717900	2300	20.41	2.45	8.30081	5.93155e-05	0.0268853	promoter	1890
NR_035499	Mir1971	chr14	78191478	78191372	-	chr14:78188201-78191300	3100	18.78	3.67	5.10598	0.000856604	0.0508625	promoter	1728
NM_001301639	Xiap	chrX	42068397	42109664	+	chrX:42066301-42068700	2400	19.6	3.67	5.3288	0.000543504	0.0508625	promoter	-897
NR_125870	Xiap	chrX	42068397	42109664	+	chrX:42066301-42068700	2400	19.6	3.67	5.3288	0.000543504	0.0508625	promoter	-897
NM_009688	Xiap	chrX	42067835	42109664	+	chrX:42066301-42068700	2400	19.6	3.67	5.3288	0.000543504	0.0508625	promoter	-335
NM_011992	Rcn2	chr9	56041844	56059083	+	chr9:56041701-56043800	2100	14.7	1.22	11.9593	0.000246768	0.0389464	promoter	906
NM_001278274	Rcn2	chr9	56041844	56043245	+	chr9:56041701-56043800	2100	14.7	1.22	11.9593	0.000246768	0.0389464	promoter	906
NM_019800	Acp6	chr3	97158776	97176576	+	chr3:97156701-97161900	5200	42.46	15.92	2.66604	0.000403497	0.0461418	promoter	524
NM_008420	Kcnb1	chr2	167188818	167095968	-	chr2:167187101-167188500	1400	8.98	0	899	0.000417779	0.0461418	promoter	1018
NM_020505	Vav3	chr3	109340682	109685694	+	chr3:109340001-109343700	3700	26.94	6.12	4.39641	0.000168624	0.0375936	promoter	1168
NR_105907	Mir6942	chr13	21396638	21396577	-	chr13:21396501-21397500	1000	8.16	0	817	0.000767161	0.0508625	promoter	-362
NR_040423	2610037D02Rik	chr15	96197974	96190473	-	chr15:96196401-96197600	1200	8.16	0	817	0.000767161	0.0508625	promoter	974
NM_001285885	Zmym6	chr4	127077382	127124374	+	chr4:127077501-127078800	1300	8.98	0	899	0.000417779	0.0461418	promoter	768
NM_177462	Zmym6	chr4	127077382	127124374	+	chr4:127077501-127078800	1300	8.98	0	899	0.000417779	0.0461418	promoter	768
NM_001285888	Zmym6	chr4	127077382	127124374	+	chr4:127077501-127078800	1300	8.98	0	899	0.000417779	0.0461418	promoter	768
NM_001285887	Zmym6	chr4	127077382	127124374	+	chr4:127077501-127078800	1300	8.98	0	899	0.000417779	0.0461418	promoter	768
NR_104366	Zmym6	chr4	127077382	127124374	+	chr4:127077501-127078800	1300	8.98	0	899	0.000417779	0.0461418	promoter	768
NM_020568	Plin4	chr17	56109802	56100590	-	chr17:56110001-56112700	2700	19.6	2.45	7.97154	9.76745e-05	0.0322374	promoter	-1548
NM_001114339	Pank1	chr19	34879455	34806935	-	chr19:34876401-34878800	2400	19.6	3.67	5.3288	0.000543504	0.0508625	promoter	1855
NM_023792	Pank1	chr19	34877917	34806935	-	chr19:34876401-34878800	2400	19.6	3.67	5.3288	0.000543504	0.0508625	promoter	317
NR_027343	Gorasp2	chr2	70661508	70691725	+	chr2:70661401-70663300	1900	13.06	1.22	10.626	0.000715246	0.0508625	promoter	842
NM_027352	Gorasp2	chr2	70661508	70691725	+	chr2:70661401-70663300	1900	13.06	1.22	10.626	0.000715246	0.0508625	promoter	842
NM_153088	Ctdsp1	chr1	74391608	74397285	+	chr1:74392101-74393800	1700	11.43	0	1144	6.86875e-05	0.0268853	promoter	1342
NR_029743	Mir26b	chr1	74394309	74394394	+	chr1:74392101-74393800	1700	11.43	0	1144	6.86875e-05	0.0268853	promoter	-1359
NM_025319	0610009B22Rik	chr11	51688634	51685384	-	chr11:51688201-51689700	1500	8.98	0	899	0.000417779	0.0461418	promoter	-316
NM_018861	Slc1a4	chr11	20332713	20302179	-	chr11:20333101-20334500	1400	9.8	0	981	0.000228261	0.0388555	promoter	-1087
NR_105938	Mir6972	chr17	34857632	34857568	-	chr17:34853701-34858200	4500	37.56	9.8	3.82977	3.08619e-05	0.0217706	promoter	1682
NM_029556	Clybl	chr14	122181693	122402234	+	chr14:122180201-122181300	1100	8.16	0	817	0.000767161	0.0508625	promoter	-943
NM_009946	Cplx2	chr13	54371348	54383917	+	chr13:54369701-54370800	1100	8.16	0	817	0.000767161	0.0508625	promoter	-1098
NR_108041	9030619P08Rik	chr15	75431829	75427605	-	chr15:75430801-75432000	1200	8.16	0	817	0.000767161	0.0508625	promoter	429
NM_133221	Slc8b1	chr5	120511191	120534024	+	chr5:120511401-120513300	1900	13.06	0	1307	2.08452e-05	0.018268	promoter	1159
NM_001177595	Slc8b1	chr5	120511191	120534024	+	chr5:120511401-120513300	1900	13.06	0	1307	2.08452e-05	0.018268	promoter	1159
NM_001177594	Slc8b1	chr5	120511191	120534024	+	chr5:120511401-120513300	1900	13.06	0	1307	2.08452e-05	0.018268	promoter	1159
NM_029457	Senp2	chr16	22009483	22049269	+	chr16:22006901-22009000	2100	17.15	2.45	6.97561	0.000429473	0.0461418	promoter	-1533
NR_027488	Senp2	chr16	22009483	22049269	+	chr16:22006901-22009000	2100	17.15	2.45	6.97561	0.000429473	0.0461418	promoter	-1533
NM_178662	Atcay	chr10	81230779	81204512	-	chr10:81229501-81230800	1300	8.16	0	817	0.000767161	0.0508625	promoter	629
NM_001111141	Sprtn	chr8	124897885	124903813	+	chr8:124892901-124901500	8600	67.77	30.62	2.21286	0.000149241	0.0358066	promoter	-685
NM_198103	Exoc8	chr8	124897705	124890298	-	chr8:124892901-124901500	8600	67.77	30.62	2.21286	0.000149241	0.0358066	promoter	505
NR_028113	0610039K10Rik	chr2	163644849	163645800	+	chr2:163639901-163646300	6400	45.72	14.7	3.10877	4.3337e-05	0.0242674	promoter	-1749
NM_139154	Rab40c	chr17	25919714	25882113	-	chr17:25918101-25920000	1900	13.88	0	1389	1.15129e-05	0.0145448	promoter	664
NR_038063	Rplp2-ps1	chr12	75631749	75630924	-	chr12:75628601-75633900	5300	47.36	19.6	2.4156	0.000571848	0.0508625	promoter	499
NM_001290652	Scml2	chrX	161162749	161258213	+	chrX:161159401-161163400	4000	29.39	6.12	4.79608	4.65552e-05	0.025061	promoter	-1349
NM_001290651	Scml2	chrX	161162749	161258213	+	chrX:161159401-161163400	4000	29.39	6.12	4.79608	4.65552e-05	0.025061	promoter	-1349
NR_045501	4921509O07Rik	chr13	113502844	113446287	-	chr13:113498901-113503100	4200	32.66	8.57	3.80769	0.000107204	0.0322374	promoter	1844
NR_002142	Rpph1	chr14	50807771	50807446	-	chr14:50805301-50807200	1900	16.33	1.22	13.2846	8.4628e-05	0.0303005	promoter	1521
NM_009632	Parp2	chr14	50807945	50821300	+	chr14:50805301-50807200	1900	16.33	1.22	13.2846	8.4628e-05	0.0303005	promoter	-1695
NM_028850	Chic2	chr5	75044641	75005003	-	chr5:75043501-75045400	1900	13.06	0	1307	2.08452e-05	0.018268	promoter	191
NM_001271591	Rpl37rt	chr5	115107962	115102921	-	chr5:115106701-115108600	1900	13.88	0	1389	1.15129e-05	0.0145448	promoter	312
NM_138628	Txlnb	chr10	17796218	17845663	+	chr10:17793501-17795100	1600	8.98	0	899	0.000417779	0.0461418	promoter	-1918
NM_001145778	Zkscan3	chr13	21402755	21387003	-	chr13:21403401-21405200	1800	11.43	0	1144	6.86875e-05	0.0268853	promoter	-1545
NM_023685	Zkscan3	chr13	21402755	21387003	-	chr13:21403401-21405200	1800	11.43	0	1144	6.86875e-05	0.0268853	promoter	-1545
NM_030743	Rnf114	chr2	167492644	167516166	+	chr2:167489501-167496100	6600	48.17	18.37	2.62133	0.000199761	0.0388555	promoter	156
NM_170756	Spata2	chr2	167492874	167481135	-	chr2:167489501-167496100	6600	48.17	18.37	2.62133	0.000199761	0.0388555	promoter	74
NM_001164598	Irf2bp2	chr8	126593436	126588295	-	chr8:126594301-126595900	1600	10.61	0	1062	0.000125063	0.0322374	promoter	-1664
NM_001040136	Pdzd9	chr7	120670343	120659295	-	chr7:120668701-120671700	3000	23.68	6.12	3.8646	0.000891092	0.0508625	promoter	143
NM_001040137	Pdzd9	chr7	120670250	120659353	-	chr7:120668701-120671700	3000	23.68	6.12	3.8646	0.000891092	0.0508625	promoter	50
NM_173442	Gcnt1	chr19	17356667	17326140	-	chr19:17354401-17356000	1600	10.61	0	1062	0.000125063	0.0322374	promoter	1467
NM_010588	Jag2	chr12	112929495	112908589	-	chr12:112927501-112932100	4600	33.48	11.02	3.03626	0.000571211	0.0508625	promoter	-305
NR_028526	Snord49b	chr11	62603085	62603148	+	chr11:62601901-62606100	4200	35.93	7.35	4.88315	5.77755e-06	0.0114397	promoter	915
NR_028550	Snord49a	chr11	62603459	62603521	+	chr11:62601901-62606100	4200	35.93	7.35	4.88315	5.77755e-06	0.0114397	promoter	541
NR_030738	2410006H16Rik	chr11	62602876	62604806	+	chr11:62601901-62606100	4200	35.93	7.35	4.88315	5.77755e-06	0.0114397	promoter	1124
NR_028541	Snord65	chr11	62604529	62604586	+	chr11:62601901-62606100	4200	35.93	7.35	4.88315	5.77755e-06	0.0114397	promoter	-529
NM_011905	Tlr2	chr3	83841608	83836271	-	chr3:83837001-83843900	6900	63.69	25.72	2.47571	4.50366e-05	0.0248313	promoter	1158
NM_008814	Pdx1	chr5	147270130	147275149	+	chr5:147266201-147270400	4200	32.66	6.12	5.32953	8.01792e-06	0.0132544	promoter	-1830
NM_146219	Klhl36	chr8	119862304	119876989	+	chr8:119863501-119864900	1400	8.98	0	899	0.000417779	0.0461418	promoter	1896
NM_001080927	Rbpj	chr5	53590485	53657445	+	chr5:53588801-53590200	1400	9.8	0	981	0.000228261	0.0388555	promoter	-985
NM_009035	Rbpj	chr5	53590345	53657445	+	chr5:53588801-53590200	1400	9.8	0	981	0.000228261	0.0388555	promoter	-845
NM_001277116	Rbpj	chr5	53590345	53657445	+	chr5:53588801-53590200	1400	9.8	0	981	0.000228261	0.0388555	promoter	-845
NM_027122	Mfsd3	chr15	76701541	76704239	+	chr15:76700201-76701900	1700	10.61	0	1062	0.000125063	0.0322374	promoter	-491
NM_172371	Slc16a13	chr11	70220994	70216791	-	chr11:70220701-70222600	1900	13.06	1.22	10.626	0.000715246	0.0508625	promoter	-656
NM_001029936	Specc1	chr11	62077023	62223013	+	chr11:62077001-62079500	2500	18.78	3.67	5.10598	0.000856604	0.0508625	promoter	1227
NM_025318	Emc6	chr11	73177042	73175502	-	chr11:73177601-73179200	1600	11.43	0	1144	6.86875e-05	0.0268853	promoter	-1358
NM_001168470	Emc6	chr11	73177008	73175502	-	chr11:73177601-73179200	1600	11.43	0	1144	6.86875e-05	0.0268853	promoter	-1392
NM_029564	Tax1bp3	chr11	73177082	73182046	+	chr11:73177601-73179200	1600	11.43	0	1144	6.86875e-05	0.0268853	promoter	1318
NM_010495	Id1	chr2	152736250	152737410	+	chr2:152733601-152736700	3100	29.39	3.67	7.98913	1.82433e-06	0.00720704	promoter	-1100
NM_197986	Tmem140	chr6	34863145	34874946	+	chr6:34862501-34864400	1900	13.88	0	1389	1.15129e-05	0.0145448	promoter	305
NM_145538	Tmem189	chr2	167661544	167643224	-	chr2:167658701-167661600	2900	24.49	4.9	4.98982	0.000159121	0.0365666	promoter	1394
NM_028132	Pgm2	chr4	99929450	99987294	+	chr4:99929801-99931800	2000	14.7	1.22	11.9593	0.000246768	0.0389464	promoter	1350
NM_017470	Dnal4	chr15	79774467	79761448	-	chr15:79774501-79777800	3300	27.76	4.9	5.6558	2.63438e-05	0.0213872	promoter	-1683
NR_040579	1700010J16Rik	chr10	112726925	112785599	+	chr10:112725401-112726500	1100	9.8	0	981	0.000228261	0.0388555	promoter	-975
NM_153169	Pnma3	chrX	73064786	73068191	+	chrX:73061701-73065300	3600	24.49	4.9	4.98982	0.000159121	0.0365666	promoter	-1286
NM_027294	Cmtm8	chr9	114844152	114789344	-	chr9:114844101-114845400	1300	8.16	0	817	0.000767161	0.0508625	promoter	-598
NM_021506	Sh3rf1	chr8	61224170	61396072	+	chr8:61223801-61225700	1900	12.25	0	1226	3.78041e-05	0.0217706	promoter	580
NR_131929	3110039I08Rik	chr9	41376525	41488426	+	chr9:41376501-41378400	1900	12.25	0	1226	3.78041e-05	0.0217706	promoter	925
NR_040725	3110039I08Rik	chr9	41376525	41432079	+	chr9:41376501-41378400	1900	12.25	0	1226	3.78041e-05	0.0217706	promoter	925
NR_131928	3110039I08Rik	chr9	41376525	41590019	+	chr9:41376501-41378400	1900	12.25	0	1226	3.78041e-05	0.0217706	promoter	925
NR_045295	2810029C07Rik	chr12	111574402	111572316	-	chr12:111571101-111578800	7700	59.6	25.72	2.31675	0.000199617	0.0388555	promoter	-548
NM_021516	Mark3	chr12	111574509	111656227	+	chr12:111571101-111578800	7700	59.6	25.72	2.31675	0.000199617	0.0388555	promoter	441
NM_022801	Mark3	chr12	111574509	111656227	+	chr12:111571101-111578800	7700	59.6	25.72	2.31675	0.000199617	0.0388555	promoter	441
NM_001039188	Rreb1	chr13	37827392	37935534	+	chr13:37826701-37831200	4500	34.29	8.57	3.99767	4.80275e-05	0.0251185	promoter	1558
NM_011420	Smn1	chr13	100124854	100137698	+	chr13:100121101-100127200	6100	49.81	18.37	2.71055	0.000104312	0.0322374	promoter	-704
NM_001252629	Smn1	chr13	100123204	100137698	+	chr13:100121101-100127200	6100	49.81	18.37	2.71055	0.000104312	0.0322374	promoter	946
NR_077219	A930006K02Rik	chr16	91465103	91470123	+	chr16:91461901-91465500	3600	26.13	7.35	3.55163	0.000830612	0.0508625	promoter	-1403
NM_013587	Lrpap1	chr5	35105697	35091505	-	chr5:35105301-35107200	1900	14.7	1.22	11.9593	0.000246768	0.0389464	promoter	-553
NM_001012392	Bpifb1	chr2	154190817	154220343	+	chr2:154191301-154192800	1500	10.61	0	1062	0.000125063	0.0322374	promoter	1233
NM_146191	Lrrk1	chr7	66388341	66258746	-	chr7:66386801-66388200	1400	9.8	0	981	0.000228261	0.0388555	promoter	841
NM_001008428	Fbxw20	chr9	109234754	109217431	-	chr9:109234201-109236100	1900	14.7	1.22	11.9593	0.000246768	0.0389464	promoter	-396
NM_177631	BC048502	chr15	103448459	103438959	-	chr15:103446901-103448200	1300	8.98	0	899	0.000417779	0.0461418	promoter	909
NM_009319	Tarbp2	chr15	102518191	102523676	+	chr15:102518401-102520800	2400	18.78	3.67	5.10598	0.000856604	0.0508625	promoter	1409
NM_001253795	Tarbp2	chr15	102518191	102523676	+	chr15:102518401-102520800	2400	18.78	3.67	5.10598	0.000856604	0.0508625	promoter	1409
NM_172833	Malt1	chr18	65430996	65478792	+	chr18:65429601-65431400	1800	11.43	0	1144	6.86875e-05	0.0268853	promoter	-496
NM_026370	Kat8	chr7	127912516	127925762	+	chr7:127911001-127912000	1000	8.16	0	817	0.000767161	0.0508625	promoter	-1016
NM_001011833	Olfr1137	chr2	87711904	87710971	-	chr2:87710301-87711600	1300	8.16	0	817	0.000767161	0.0508625	promoter	954
NM_172444	Thsd4	chr9	60141220	59966930	-	chr9:60141601-60142900	1300	8.16	0	817	0.000767161	0.0508625	promoter	-1030
NM_133787	Nmd3	chr3	69722054	69749046	+	chr3:69721501-69722800	1300	9.8	0	981	0.000228261	0.0388555	promoter	96
NM_145853	Tpcn1	chr5	120588613	120534156	-	chr5:120586701-120593400	6700	48.99	14.7	3.33107	1.01611e-05	0.0145448	promoter	-1437
NM_029408	Iqcd	chr5	120589022	120607113	+	chr5:120586701-120593400	6700	48.99	14.7	3.33107	1.01611e-05	0.0145448	promoter	1028
NM_001002008	Zfp948	chr17	21567045	21588682	+	chr17:21566001-21569000	3000	21.23	3.67	5.77174	0.000216387	0.0388555	promoter	455
NM_008810	Pdha1	chrX	160138430	160122218	-	chrX:160137101-160138400	1300	8.98	0	899	0.000417779	0.0461418	promoter	680
NM_001013759	Gas2l2	chr11	83429521	83421634	-	chr11:83428201-83430600	2400	20.41	2.45	8.30081	5.93155e-05	0.0268853	promoter	121
NM_008710	Nnt	chr13	119409011	119334316	-	chr13:119408701-119410600	1900	13.06	1.22	10.626	0.000715246	0.0508625	promoter	-639
NM_001308506	Nnt	chr13	119409257	119335526	-	chr13:119408701-119410600	1900	13.06	1.22	10.626	0.000715246	0.0508625	promoter	-393
NM_026644	Agpat4	chr17	12119283	12219640	+	chr17:12119101-12121000	1900	12.25	0	1226	3.78041e-05	0.0217706	promoter	767
NM_009873	Cdk6	chr5	3343892	3531005	+	chr5:3342101-3344000	1900	14.7	1.22	11.9593	0.000246768	0.0389464	promoter	-842
NM_001253700	Elp5	chr11	69980330	69968225	-	chr11:69979501-69981100	1600	9.8	0	981	0.000228261	0.0388555	promoter	30
NM_018740	Elp5	chr11	69981235	69968225	-	chr11:69979501-69981100	1600	9.8	0	981	0.000228261	0.0388555	promoter	935
NM_026017	Ctdnep1	chr11	69981167	69990600	+	chr11:69979501-69981100	1600	9.8	0	981	0.000228261	0.0388555	promoter	-867
NM_029901	Akr1c21	chr13	4574074	4586543	+	chr13:4571601-4572600	1000	8.16	0	817	0.000767161	0.0508625	promoter	-1974
NM_173743	Apol9b	chr15	77729071	77736382	+	chr15:77728501-77731400	2900	26.13	7.35	3.55163	0.000830612	0.0508625	promoter	879
NM_001168660	Apol9b	chr15	77729120	77736382	+	chr15:77728501-77731400	2900	26.13	7.35	3.55163	0.000830612	0.0508625	promoter	830
NM_145923	Rell1	chr5	63968897	63908897	-	chr5:63969901-63971200	1300	8.98	0	899	0.000417779	0.0461418	promoter	-1653
NM_176940	Nwd1	chr8	72646710	72714748	+	chr8:72647201-72648700	1500	9.8	0	981	0.000228261	0.0388555	promoter	1240
NM_023343	Ilkap	chr1	91398783	91375830	-	chr1:91397201-91398500	1300	8.98	0	899	0.000417779	0.0461418	promoter	933
NM_053009	Zfp91	chr19	12796123	12766938	-	chr19:12793101-12795300	2200	19.6	3.67	5.3288	0.000543504	0.0508625	promoter	1923
NR_024093	Gm44505	chr19	12796123	12763527	-	chr19:12793101-12795300	2200	19.6	3.67	5.3288	0.000543504	0.0508625	promoter	1923
NM_175223	Dnali1	chr4	125065657	125055338	-	chr4:125066401-125068300	1900	14.7	0	1471	6.36798e-06	0.0114397	promoter	-1693
NM_175246	Snip1	chr4	125066692	125074043	+	chr4:125066401-125068300	1900	14.7	0	1471	6.36798e-06	0.0114397	promoter	658
NM_175472	Zcchc11	chr4	108459425	108559415	+	chr4:108459001-108462500	3500	21.23	3.67	5.77174	0.000216387	0.0388555	promoter	1325
NM_029803	Ifi27l2a	chr12	103443680	103442165	-	chr12:103441401-103444500	3100	27.76	6.12	4.53018	0.00011017	0.0322374	promoter	730
NM_001281830	Ifi27l2a	chr12	103443680	103433872	-	chr12:103441401-103444500	3100	27.76	6.12	4.53018	0.00011017	0.0322374	promoter	730
NM_001033488	Mfsd2b	chr12	4874359	4862437	-	chr12:4872001-4873800	1800	13.06	0	1307	2.08452e-05	0.018268	promoter	1459
NM_001302651	Ifi203	chr1	173942492	173920400	-	chr1:173941901-173945500	3600	26.13	7.35	3.55163	0.000830612	0.0508625	promoter	-1208
NM_001302649	Ifi203	chr1	173942492	173920400	-	chr1:173941901-173945500	3600	26.13	7.35	3.55163	0.000830612	0.0508625	promoter	-1208
NM_001302650	Ifi203	chr1	173942672	173920400	-	chr1:173941901-173945500	3600	26.13	7.35	3.55163	0.000830612	0.0508625	promoter	-1028
NM_008965	Ptger4	chr15	5244187	5233398	-	chr15:5239301-5245300	6000	45.72	17.15	2.66492	0.000241288	0.0389464	promoter	1887
NM_001136079	Ptger4	chr15	5244187	5233398	-	chr15:5239301-5245300	6000	45.72	17.15	2.66492	0.000241288	0.0389464	promoter	1887
NM_145128	Mgat5	chr1	127204985	127482972	+	chr1:127205201-127207200	2000	14.7	1.22	11.9593	0.000246768	0.0389464	promoter	1215
NR_046034	Slc36a1os	chr11	55197682	55191718	-	chr11:55194701-55198900	4200	33.48	8.57	3.90326	7.18744e-05	0.0277024	promoter	882
NM_024222	Stt3b	chr9	115310421	115242581	-	chr9:115310601-115312500	1900	13.06	1.22	10.626	0.000715246	0.0508625	promoter	-1129
NM_172526	Ttc24	chr3	88078304	88069409	-	chr3:88074101-88081700	7600	65.32	30.62	2.13288	0.000339186	0.0461418	promoter	404
NM_019734	Asah1	chr8	41374697	41340645	-	chr8:41374401-41375400	1000	8.16	0	817	0.000767161	0.0508625	promoter	-203
NM_009326	Tcea2	chr2	181680309	181688051	+	chr2:181680701-181682800	2100	16.33	2.45	6.64228	0.000699507	0.0508625	promoter	1441
NM_022879	Myl7	chr11	5898782	5896636	-	chr11:5899801-5900900	1100	8.16	0	817	0.000767161	0.0508625	promoter	-1568
NM_001310644	Rpe	chr1	66700830	66719805	+	chr1:66700901-66702400	1500	9.8	0	981	0.000228261	0.0388555	promoter	820
NM_001310643	Rpe	chr1	66700830	66719805	+	chr1:66700901-66702400	1500	9.8	0	981	0.000228261	0.0388555	promoter	820
NM_025683	Rpe	chr1	66700830	66719805	+	chr1:66700901-66702400	1500	9.8	0	981	0.000228261	0.0388555	promoter	820
NM_001310642	Rpe	chr1	66700830	66719805	+	chr1:66700901-66702400	1500	9.8	0	981	0.000228261	0.0388555	promoter	820
NM_001290419	Snapc4	chr2	26380653	26362764	-	chr2:26379701-26381800	2100	16.33	2.45	6.64228	0.000699507	0.0508625	promoter	-97
NM_172339	Snapc4	chr2	26380653	26362764	-	chr2:26379701-26381800	2100	16.33	2.45	6.64228	0.000699507	0.0508625	promoter	-97
NM_018853	Rplp1	chr9	61914510	61913282	-	chr9:61915401-61916800	1400	8.98	0	899	0.000417779	0.0461418	promoter	-1590
NM_027655	4933405L10Rik	chr8	105708302	105710168	+	chr8:105705601-105708600	3000	23.68	2.45	9.63008	7.89697e-06	0.0132544	promoter	-1202
NM_198299	Enkd1	chr8	105708168	105703651	-	chr8:105705601-105708600	3000	23.68	2.45	9.63008	7.89697e-06	0.0132544	promoter	1068
NM_009203	Slc22a12	chr19	6543070	6535855	-	chr19:6543101-6546200	3100	23.68	4.9	4.82485	0.000247429	0.0389464	promoter	-1580
NM_172307	Mbtps2	chrX	157598715	157547821	-	chrX:157598801-157601100	2300	17.96	1.22	14.6098	2.88777e-05	0.0217706	promoter	-1235
NR_038073	Snhg4	chr18	35553409	35558316	+	chr18:35552301-35555200	2900	19.6	3.67	5.3288	0.000543504	0.0508625	promoter	341
NR_035472	Mir1949	chr18	35554566	35554636	+	chr18:35552301-35555200	2900	19.6	3.67	5.3288	0.000543504	0.0508625	promoter	-816
NM_008865	Prl3b1	chr13	27242429	27249740	+	chr13:27243501-27244600	1100	8.16	0	817	0.000767161	0.0508625	promoter	1621
NM_153134	Irgq	chr7	24530647	24538600	+	chr7:24530801-24532400	1600	8.16	0	817	0.000767161	0.0508625	promoter	953
NM_026366	N6amt1	chr16	87354184	87368649	+	chr16:87352801-87357700	4900	41.64	14.7	2.83141	0.000247752	0.0389464	promoter	1066
NM_001159331	N6amt1	chr16	87354184	87368649	+	chr16:87352801-87357700	4900	41.64	14.7	2.83141	0.000247752	0.0389464	promoter	1066
NM_008629	Msi1	chr5	115429684	115454202	+	chr5:115426901-115429500	2600	20.41	2.45	8.30081	5.93155e-05	0.0268853	promoter	-1484
NM_144920	Plekha5	chr6	140424098	140594906	+	chr6:140422701-140423800	1100	8.16	0	817	0.000767161	0.0508625	promoter	-848
NM_001101510	Susd5	chr9	114057353	114098733	+	chr9:114055201-114056300	1100	8.16	0	817	0.000767161	0.0508625	promoter	-1603
NM_001085472	Acin1	chr14	54653701	54642160	-	chr14:54652001-54653900	1900	13.06	1.22	10.626	0.000715246	0.0508625	promoter	751
NM_001242605	Acin1	chr14	54653685	54642160	-	chr14:54652001-54653900	1900	13.06	1.22	10.626	0.000715246	0.0508625	promoter	735
NM_001242606	Acin1	chr14	54653685	54642160	-	chr14:54652001-54653900	1900	13.06	1.22	10.626	0.000715246	0.0508625	promoter	735
NM_019567	Acin1	chr14	54653685	54642160	-	chr14:54652001-54653900	1900	13.06	1.22	10.626	0.000715246	0.0508625	promoter	735
NM_023625	Plbd2	chr5	120503623	120483892	-	chr5:120502001-120505400	3400	26.13	7.35	3.55163	0.000830612	0.0508625	promoter	-77
NM_019867	Ngef	chr1	87510362	87476828	-	chr1:87511101-87512300	1200	9.8	0	981	0.000228261	0.0388555	promoter	-1338
NM_008806	Pde6b	chr5	108388372	108431742	+	chr5:108389501-108390800	1300	8.16	0	817	0.000767161	0.0508625	promoter	1778
NM_146571	Olfr1015	chr2	85785473	85786489	+	chr2:85783401-85784800	1400	8.16	0	817	0.000767161	0.0508625	promoter	-1373
NM_028883	Tldc1	chr8	119778416	119760586	-	chr8:119777201-119781000	3800	28.58	8.57	3.33217	0.000748874	0.0508625	promoter	-684
NM_001301181	Cast	chr13	74734261	74693293	-	chr13:74733401-74735000	1600	9.8	0	981	0.000228261	0.0388555	promoter	61
NM_001301160	Cast	chr13	74734261	74693293	-	chr13:74733401-74735000	1600	9.8	0	981	0.000228261	0.0388555	promoter	61
NM_001301158	Cast	chr13	74734261	74693293	-	chr13:74733401-74735000	1600	9.8	0	981	0.000228261	0.0388555	promoter	61
NM_177410	Bcl2	chr1	106714290	106712164	-	chr1:106712101-106714000	1900	13.88	1.22	11.2927	0.000420465	0.0461418	promoter	1240
NM_009741	Bcl2	chr1	106714290	106538175	-	chr1:106712101-106714000	1900	13.88	1.22	11.2927	0.000420465	0.0461418	promoter	1240
NM_172780	Slc9a6	chrX	56609834	56664230	+	chrX:56609301-56610400	1100	8.16	0	817	0.000767161	0.0508625	promoter	16
NR_045801	5730460C07Rik	chr3	153792087	153789304	-	chr3:153791901-153793400	1500	8.98	0	899	0.000417779	0.0461418	promoter	-563
NM_001164768	Fbxw2	chr2	34823181	34804363	-	chr2:34821401-34823000	1600	10.61	0	1062	0.000125063	0.0322374	promoter	981
NM_010124	Eif4ebp2	chr10	61452669	61432496	-	chr10:61450101-61452000	1900	13.88	0	1389	1.15129e-05	0.0145448	promoter	1619
NM_080553	Itpr3	chr17	27057303	27122223	+	chr17:27056801-27058900	2100	17.15	2.45	6.97561	0.000429473	0.0461418	promoter	547
NM_177464	R3hcc1l	chr19	42518804	42592256	+	chr19:42516401-42520400	4000	28.58	8.57	3.33217	0.000748874	0.0508625	promoter	-404
NM_033074	Tars	chr15	11399658	11383662	-	chr15:11398101-11399300	1200	8.16	0	817	0.000767161	0.0508625	promoter	958
NM_008357	Il15	chr8	82402586	82331623	-	chr8:82401501-82405000	3500	22.86	4.9	4.65784	0.000383349	0.0461418	promoter	-664
NM_001254747	Il15	chr8	82402586	82331623	-	chr8:82401501-82405000	3500	22.86	4.9	4.65784	0.000383349	0.0461418	promoter	-664
NM_001204166	Rapgef4	chr2	72054616	72257474	+	chr2:72052801-72055300	2500	17.15	2.45	6.97561	0.000429473	0.0461418	promoter	-566
NM_001024849	Gm14325	chr2	177840336	177828990	-	chr2:177839301-177842600	3300	29.39	8.57	3.42657	0.00051168	0.0508625	promoter	-614
NM_026430	Uxs1	chr1	43827708	43750230	-	chr1:43826801-43830300	3500	27.76	6.12	4.53018	0.00011017	0.0322374	promoter	-842
NM_026350	Ccdc130	chr8	84270402	84257766	-	chr8:84268101-84272500	4400	31.84	7.35	4.32745	4.85163e-05	0.0251185	promoter	102
NM_001294281	Ccdc130	chr8	84270402	84257766	-	chr8:84268101-84272500	4400	31.84	7.35	4.32745	4.85163e-05	0.0251185	promoter	102
NM_001316754	Hmgxb4	chr8	75016221	75031978	+	chr8:75016001-75020200	4200	28.58	8.57	3.33217	0.000748874	0.0508625	promoter	1879
NM_001141982	Rbm43	chr2	51934644	51924448	-	chr2:51931701-51933900	2200	17.15	1.22	13.9512	4.94638e-05	0.0251185	promoter	1844
NM_029247	4930550C14Rik	chr9	53405285	53432803	+	chr9:53403801-53405800	2000	15.51	1.22	12.6179	0.00014461	0.0349564	promoter	-485
NM_001081970	Apol8	chr15	77755229	77748612	-	chr15:77754001-77755200	1200	9.8	0	981	0.000228261	0.0388555	promoter	629
NM_178638	Tmem108	chr9	103761837	103482935	-	chr9:103759401-103761000	1600	9.8	0	981	0.000228261	0.0388555	promoter	1637
NM_028422	Mtg2	chr2	180070592	180085902	+	chr2:180069501-180073100	3600	31.84	9.8	3.24669	0.00045574	0.0484448	promoter	708
NM_181424	Mtg2	chr2	180070592	180085902	+	chr2:180069501-180073100	3600	31.84	9.8	3.24669	0.00045574	0.0484448	promoter	708
NM_001083329	Mtg2	chr2	180070592	180085902	+	chr2:180069501-180073100	3600	31.84	9.8	3.24669	0.00045574	0.0484448	promoter	708
NM_001083328	Mtg2	chr2	180070592	180085902	+	chr2:180069501-180073100	3600	31.84	9.8	3.24669	0.00045574	0.0484448	promoter	708
NM_175657	Hist1h4n	chr13	21832158	21831792	-	chr13:21829601-21835200	5600	45.72	18.37	2.48803	0.000516332	0.0508625	promoter	-242
NM_178185	Hist1h2ap	chr13	21833475	21833023	-	chr13:21829601-21835200	5600	45.72	18.37	2.48803	0.000516332	0.0508625	promoter	1075
NM_001313880	Hist1h2bq	chr13	21833742	21834201	+	chr13:21829601-21835200	5600	45.72	18.37	2.48803	0.000516332	0.0508625	promoter	-1342
NM_001313878	Hist1h2br	chr13	21833742	21834201	+	chr13:21829601-21835200	5600	45.72	18.37	2.48803	0.000516332	0.0508625	promoter	-1342
NM_001110555	Hist1h2br	chr13	21833742	21837530	+	chr13:21829601-21835200	5600	45.72	18.37	2.48803	0.000516332	0.0508625	promoter	-1342
NM_001097979	Hist1h2bq	chr13	21833742	21837530	+	chr13:21829601-21835200	5600	45.72	18.37	2.48803	0.000516332	0.0508625	promoter	-1342
NM_001177544	Hist1h2ao	chr13	21833575	21833023	-	chr13:21829601-21835200	5600	45.72	18.37	2.48803	0.000516332	0.0508625	promoter	1175
NM_010780	Cma1	chr14	55944675	55941450	-	chr14:55942801-55944700	1900	13.88	1.22	11.2927	0.000420465	0.0461418	promoter	925
NM_011176	St14	chr9	31131799	31088589	-	chr9:31130901-31132800	1900	13.06	1.22	10.626	0.000715246	0.0508625	promoter	-51
NR_040357	Gm19276	chr15	10829050	10832713	+	chr15:10825301-10831200	5900	36.74	13.47	2.72626	0.000814775	0.0508625	promoter	-800
NM_001347577	Mef2c	chr13	83573606	83667079	+	chr13:83571801-83575400	3600	26.13	7.35	3.55163	0.000830612	0.0508625	promoter	-6
NM_001347569	Mef2c	chr13	83573606	83667079	+	chr13:83571801-83575400	3600	26.13	7.35	3.55163	0.000830612	0.0508625	promoter	-6
NR_126436	4930559C10Rik	chr12	93444823	93416456	-	chr12:93442401-93445700	3300	25.31	6.12	4.13051	0.000390731	0.0461418	promoter	773
NM_145852	Ropn1l	chr15	31453689	31441209	-	chr15:31451001-31453100	2100	17.15	2.45	6.97561	0.000429473	0.0461418	promoter	1639
NM_001177370	Nfkb2	chr19	46305929	46312090	+	chr19:46303601-46305800	2200	16.33	1.22	13.2846	8.4628e-05	0.0303005	promoter	-1229
NM_001177369	Nfkb2	chr19	46304736	46312090	+	chr19:46303601-46305800	2200	16.33	1.22	13.2846	8.4628e-05	0.0303005	promoter	-36
NM_019408	Nfkb2	chr19	46305694	46312090	+	chr19:46303601-46305800	2200	16.33	1.22	13.2846	8.4628e-05	0.0303005	promoter	-994
NM_173442	Gcnt1	chr19	17356667	17326140	-	chr19:17356501-17360200	3700	26.13	4.9	5.32383	6.51454e-05	0.0268853	promoter	-1683
NM_178372	Prss34	chr17	25298393	25300161	+	chr17:25299201-25300400	1200	8.98	0	899	0.000417779	0.0461418	promoter	1407
NM_009885	Cel	chr2	28563403	28555819	-	chr2:28562501-28565700	3200	21.23	4.9	4.32587	0.00090941	0.0508625	promoter	-697
NM_016763	Hsd17b10	chrX	152001895	152004442	+	chrX:151999101-152000900	1800	13.06	1.22	10.626	0.000715246	0.0508625	promoter	-1895
NM_010408	Hcn1	chr13	117602319	117981028	+	chr13:117603601-117604700	1100	8.16	0	817	0.000767161	0.0508625	promoter	1831
NM_008105	Gcnt2	chr13	40886757	40960892	+	chr13:40883801-40886900	3100	23.68	6.12	3.8646	0.000891092	0.0508625	promoter	-1407
NM_001164495	Syn3	chr10	86498896	86291592	-	chr10:86498501-86500000	1500	8.98	0	899	0.000417779	0.0461418	promoter	-354
NM_013722	Syn3	chr10	86498896	86048745	-	chr10:86498501-86500000	1500	8.98	0	899	0.000417779	0.0461418	promoter	-354
NR_121596	Gm1965	chr6	89140993	89147370	+	chr6:89140101-89141200	1100	8.16	0	817	0.000767161	0.0508625	promoter	-343
NR_121595	Gm1965	chr6	89140993	89147370	+	chr6:89140101-89141200	1100	8.16	0	817	0.000767161	0.0508625	promoter	-343
NR_121594	Gm1965	chr6	89140993	89147370	+	chr6:89140101-89141200	1100	8.16	0	817	0.000767161	0.0508625	promoter	-343
NR_121593	Gm1965	chr6	89140993	89147370	+	chr6:89140101-89141200	1100	8.16	0	817	0.000767161	0.0508625	promoter	-343
NM_030093	Snrnp25	chr11	32205414	32208995	+	chr11:32203901-32205000	1100	8.16	0	817	0.000767161	0.0508625	promoter	-964
NM_001163513	Dlg5	chr14	24245920	24133952	-	chr14:24247001-24248100	1100	8.16	0	817	0.000767161	0.0508625	promoter	-1630
NM_027726	Dlg5	chr14	24245920	24133952	-	chr14:24247001-24248100	1100	8.16	0	817	0.000767161	0.0508625	promoter	-1630
NM_029850	Bcl7a	chr5	123344447	123374083	+	chr5:123339701-123345200	5500	36.74	9.8	3.74618	4.58036e-05	0.0249883	promoter	-1997
NM_001256107	Mib2	chr4	155669254	155654469	-	chr4:155669701-155671100	1400	9.8	0	981	0.000228261	0.0388555	promoter	-1146
NM_145124	Mib2	chr4	155669254	155654469	-	chr4:155669701-155671100	1400	9.8	0	981	0.000228261	0.0388555	promoter	-1146
NM_001256108	Mib2	chr4	155669254	155654471	-	chr4:155669701-155671100	1400	9.8	0	981	0.000228261	0.0388555	promoter	-1146
NM_138663	Pcdha12	chr18	37020229	37187657	+	chr18:37017701-37019100	1400	8.16	0	817	0.000767161	0.0508625	promoter	-1829
NM_010696	Lcp2	chr11	34047200	34092280	+	chr11:34047301-34049100	1800	12.25	0	1226	3.78041e-05	0.0217706	promoter	1000
NM_001199044	Prrc2a	chr17	35164877	35149085	-	chr17:35161901-35165000	3100	29.39	7.35	3.99457	0.000167564	0.0375936	promoter	1427
NM_020027	Prrc2a	chr17	35164877	35149085	-	chr17:35161901-35165000	3100	29.39	7.35	3.99457	0.000167564	0.0375936	promoter	1427
NM_198176	Fastkd5	chr2	130630027	130613837	-	chr2:130629101-130630500	1400	8.16	0	817	0.000767161	0.0508625	promoter	227
NM_001146084	Fastkd5	chr2	130630027	130613837	-	chr2:130629101-130630500	1400	8.16	0	817	0.000767161	0.0508625	promoter	227
NM_001255994	Ubox5	chr2	130630038	130589995	-	chr2:130629101-130630500	1400	8.16	0	817	0.000767161	0.0508625	promoter	238
NM_001255993	Ubox5	chr2	130630038	130589995	-	chr2:130629101-130630500	1400	8.16	0	817	0.000767161	0.0508625	promoter	238
NM_080562	Ubox5	chr2	130630038	130589995	-	chr2:130629101-130630500	1400	8.16	0	817	0.000767161	0.0508625	promoter	238
NM_001110218	Ppm1h	chr10	122678761	122945793	+	chr10:122678301-122681600	3300	23.68	6.12	3.8646	0.000891092	0.0508625	promoter	1189
NM_176919	Ppm1h	chr10	122678761	122921974	+	chr10:122678301-122681600	3300	23.68	6.12	3.8646	0.000891092	0.0508625	promoter	1189
NR_106182	Mir8104	chr10	122679314	122679415	+	chr10:122678301-122681600	3300	23.68	6.12	3.8646	0.000891092	0.0508625	promoter	636
NM_145465	Stk24	chr14	121379230	121286340	-	chr14:121377001-121379800	2800	22.05	1.22	17.935	1.93046e-06	0.00720704	promoter	830
NM_080463	Pofut1	chr2	153241531	153270249	+	chr2:153238301-153240900	2600	18.78	2.45	7.63821	0.000160448	0.0365666	promoter	-1931
NM_018807	Plagl2	chr2	153241358	153227768	-	chr2:153238301-153240900	2600	18.78	2.45	7.63821	0.000160448	0.0365666	promoter	1758
NM_001145804	Nucks1	chr1	131910457	131936321	+	chr1:131910201-131912700	2500	20.41	3.67	5.54891	0.000343545	0.0461418	promoter	993
NM_175294	Nucks1	chr1	131910457	131936321	+	chr1:131910201-131912700	2500	20.41	3.67	5.54891	0.000343545	0.0461418	promoter	993
NR_030434	Mir763	chr10	120448110	120447990	-	chr10:120448901-120449900	1000	8.16	0	817	0.000767161	0.0508625	promoter	-1290
NR_106085	Mir7226	chr4	118210564	118210504	-	chr4:118208201-118210300	2100	16.33	1.22	13.2846	8.4628e-05	0.0303005	promoter	1314
NM_001163748	Pde9a	chr17	31386233	31476309	+	chr17:31386701-31388200	1500	8.98	0	899	0.000417779	0.0461418	promoter	1217
NM_008804	Pde9a	chr17	31386233	31476309	+	chr17:31386701-31388200	1500	8.98	0	899	0.000417779	0.0461418	promoter	1217
NM_175148	2300002M23Rik	chr17	35567484	35568945	+	chr17:35566801-35567900	1100	8.98	0	899	0.000417779	0.0461418	promoter	-134
NM_001331226	Lztr1	chr16	17509211	17526333	+	chr16:17509001-17511900	2900	20.41	3.67	5.54891	0.000343545	0.0461418	promoter	1239
NM_025808	Lztr1	chr16	17508682	17526333	+	chr16:17509001-17511900	2900	20.41	3.67	5.54891	0.000343545	0.0461418	promoter	1768
NM_001331227	Lztr1	chr16	17508682	17526333	+	chr16:17509001-17511900	2900	20.41	3.67	5.54891	0.000343545	0.0461418	promoter	1768
NM_177117	Dlec1	chr9	119102477	119147694	+	chr9:119102101-119103500	1400	9.8	0	981	0.000228261	0.0388555	promoter	323
NM_010344	Gsr	chr8	33653237	33698162	+	chr8:33651601-33653200	1600	9.8	0	981	0.000228261	0.0388555	promoter	-837
NM_011680	Usf2	chr7	30956803	30945247	-	chr7:30955301-30956900	1600	8.16	0	817	0.000767161	0.0508625	promoter	703
NM_028820	1700017B05Rik	chr9	57262599	57252321	-	chr9:57261401-57262700	1300	8.98	0	899	0.000417779	0.0461418	promoter	549
NM_027988	Noxo1	chr17	24696233	24700529	+	chr17:24695101-24696300	1200	8.16	0	817	0.000767161	0.0508625	promoter	-533
NM_023040	Gfer	chr17	24696156	24693190	-	chr17:24695101-24696300	1200	8.16	0	817	0.000767161	0.0508625	promoter	456
NM_026514	Cdc42ep3	chr17	79355091	79334024	-	chr17:79353301-79354700	1400	10.61	0	1062	0.000125063	0.0322374	promoter	1091
NM_178695	Prrg4	chr2	104849850	104830740	-	chr2:104848101-104851300	3200	24.49	3.67	6.65761	3.3015e-05	0.0217706	promoter	150
NM_027722	Nudt4	chr10	95564167	95547006	-	chr10:95564601-95566100	1500	10.61	0	1062	0.000125063	0.0322374	promoter	-1183
NM_010185	Fcer1g	chr1	171234349	171229571	-	chr1:171230601-171237000	6400	52.26	22.05	2.36945	0.000376295	0.0461418	promoter	549
NM_001127382	Rbm47	chr5	66151954	66016548	-	chr5:66152701-66154000	1300	8.16	0	817	0.000767161	0.0508625	promoter	-1396
NM_001271727	Trim2	chr3	84259779	84160438	-	chr3:84258501-84264200	5700	48.17	18.37	2.62133	0.000199761	0.0388555	promoter	-1571
NM_001001335	Plekha8	chr6	54603146	54645822	+	chr6:54600701-54602100	1400	8.98	0	899	0.000417779	0.0461418	promoter	-1746
NM_001099793	Trmt61a	chr12	111678104	111683902	+	chr12:111676801-111681100	4300	40.82	13.47	3.02893	0.000145413	0.0350961	promoter	846
NM_177374	Trmt61a	chr12	111678104	111683902	+	chr12:111676801-111681100	4300	40.82	13.47	3.02893	0.000145413	0.0350961	promoter	846
NM_001099792	Trmt61a	chr12	111678104	111683902	+	chr12:111676801-111681100	4300	40.82	13.47	3.02893	0.000145413	0.0350961	promoter	846
NM_007692	Chkb	chr15	89429927	89426348	-	chr15:89426501-89429400	2900	25.31	4.9	5.15682	0.000101979	0.0322374	promoter	1977
NR_037154	Chkb	chr15	89429927	89426348	-	chr15:89426501-89429400	2900	25.31	4.9	5.15682	0.000101979	0.0322374	promoter	1977
NR_037153	Chkb	chr15	89429927	89426348	-	chr15:89426501-89429400	2900	25.31	4.9	5.15682	0.000101979	0.0322374	promoter	1977
NR_004843	Gm44502	chr15	89429927	89416404	-	chr15:89426501-89429400	2900	25.31	4.9	5.15682	0.000101979	0.0322374	promoter	1977
NM_178627	Poldip3	chr15	83149336	83125977	-	chr15:83148301-83151900	3600	23.68	3.67	6.4375	5.30525e-05	0.0262545	promoter	-764
NR_004432	Rnu12	chr15	83149644	83149794	+	chr15:83148301-83151900	3600	23.68	3.67	6.4375	5.30525e-05	0.0262545	promoter	456
NM_001347082	Poldip3	chr15	83149378	83125967	-	chr15:83148301-83151900	3600	23.68	3.67	6.4375	5.30525e-05	0.0262545	promoter	-722
NM_008856	Prkch	chr12	73584795	73778184	+	chr12:73583401-73586600	3200	28.58	6.12	4.66395	7.17334e-05	0.0277024	promoter	205
NM_001313977	Prkch	chr12	73584795	73778184	+	chr12:73583401-73586600	3200	28.58	6.12	4.66395	7.17334e-05	0.0277024	promoter	205
NM_178187	Hist1h2ae	chr13	23571220	23570662	-	chr13:23569601-23572700	3100	22.86	4.9	4.65784	0.000383349	0.0461418	promoter	70
NM_178196	Hist1h2bg	chr13	23571399	23571863	+	chr13:23569601-23572700	3100	22.86	4.9	4.65784	0.000383349	0.0461418	promoter	-249
NM_009821	Runx1	chr16	92697329	92601465	-	chr16:92694701-92696600	1900	12.25	0	1226	3.78041e-05	0.0217706	promoter	1679
NM_001111023	Runx1	chr16	92697329	92601465	-	chr16:92694701-92696600	1900	12.25	0	1226	3.78041e-05	0.0217706	promoter	1679
NM_029492	Zdhhc20	chr14	57890262	57832701	-	chr14:57887001-57891600	4600	40.01	7.35	5.4375	6.44533e-07	0.00485227	promoter	962
NM_007626	Cbx5	chr15	103215352	103191545	-	chr15:103213201-103217600	4400	37.56	11.02	3.40617	9.08341e-05	0.0317725	promoter	-48
NM_001110216	Cbx5	chr15	103215352	103191545	-	chr15:103213201-103217600	4400	37.56	11.02	3.40617	9.08341e-05	0.0317725	promoter	-48
NM_026368	Caap1	chr4	94556796	94500078	-	chr4:94555901-94557100	1200	8.98	0	899	0.000417779	0.0461418	promoter	296
NM_177182	Bhlha9	chr11	76672469	76673676	+	chr11:76670101-76671800	1700	9.8	0	981	0.000228261	0.0388555	promoter	-1519
NM_030199	Zfp623	chr15	75940951	75949400	+	chr15:75939301-75944500	5200	40.01	9.8	4.07951	9.27154e-06	0.0145448	promoter	949
NM_030689	Nptxr	chr15	79804709	79786350	-	chr15:79803501-79805600	2100	15.51	1.22	12.6179	0.00014461	0.0349564	promoter	159
NM_019516	Lgals12	chr19	7607176	7596660	-	chr19:7607101-7608300	1200	8.16	0	817	0.000767161	0.0508625	promoter	-524
NM_001033242	Cln5	chr14	103070215	103077630	+	chr14:103069701-103072000	2300	14.7	1.22	11.9593	0.000246768	0.0389464	promoter	635
NM_001289461	Hgf	chr5	16553900	16619439	+	chr5:16554601-16556800	2200	15.51	1.22	12.6179	0.00014461	0.0349564	promoter	1800
NM_026877	Aspscr1	chr11	120672972	120709446	+	chr11:120672201-120676200	4000	27.76	6.12	4.53018	0.00011017	0.0322374	promoter	1228
NM_001313695	Mcm6	chr1	128359705	128331574	-	chr1:128356401-128361500	5100	40.82	14.7	2.77566	0.000347541	0.0461418	promoter	755
NM_008567	Mcm6	chr1	128359705	128331574	-	chr1:128356401-128361500	5100	40.82	14.7	2.77566	0.000347541	0.0461418	promoter	755
NM_019999	Pnkd	chr1	74332609	74353692	+	chr1:74332801-74333900	1100	8.16	0	817	0.000767161	0.0508625	promoter	741
NR_038156	2610020C07Rik	chr16	11203382	11225796	+	chr16:11201901-11205500	3600	30.21	9.8	3.08053	0.000950685	0.0508625	promoter	318
NM_025546	Rsl1d1	chr16	11203292	11193036	-	chr16:11201901-11205500	3600	30.21	9.8	3.08053	0.000950685	0.0508625	promoter	-408
NM_001164611	Smpd4	chr16	17619353	17644830	+	chr16:17618201-17621400	3200	21.23	3.67	5.77174	0.000216387	0.0388555	promoter	447
NM_001164610	Smpd4	chr16	17619353	17644830	+	chr16:17618201-17621400	3200	21.23	3.67	5.77174	0.000216387	0.0388555	promoter	447
NM_001164609	Smpd4	chr16	17619353	17644830	+	chr16:17618201-17621400	3200	21.23	3.67	5.77174	0.000216387	0.0388555	promoter	447
NM_029945	Smpd4	chr16	17619353	17644830	+	chr16:17618201-17621400	3200	21.23	3.67	5.77174	0.000216387	0.0388555	promoter	447
NM_001163687	Naaa	chr5	92278181	92257659	-	chr5:92278601-92281700	3100	23.68	4.9	4.82485	0.000247429	0.0389464	promoter	-1969
NM_025972	Naaa	chr5	92278181	92257659	-	chr5:92278601-92281700	3100	23.68	4.9	4.82485	0.000247429	0.0389464	promoter	-1969
NM_001081225	Fam178a	chr19	44931118	44983787	+	chr19:44930401-44931800	1400	9.8	0	981	0.000228261	0.0388555	promoter	-18
NM_011653	Tuba1a	chr15	98953501	98949846	-	chr15:98949501-98954500	5000	36.74	12.25	2.99755	0.000343501	0.0461418	promoter	1501
NM_011413	C4a	chr17	34823454	34809091	-	chr17:34824001-34825500	1500	11.43	0	1144	6.86875e-05	0.0268853	promoter	-1296
NM_153152	2410015M20Rik	chr17	56609771	56607451	-	chr17:56607901-56611800	3900	33.48	3.67	9.10054	1.54876e-07	0.00255806	promoter	-79
NM_016677	Hpcal1	chr12	17690813	17791926	+	chr12:17689801-17692000	2200	17.15	2.45	6.97561	0.000429473	0.0461418	promoter	87
NM_011161	Mapk11	chr15	89149606	89142483	-	chr15:89147201-89151800	4600	35.93	12.25	2.93148	0.000488415	0.0508625	promoter	106
NM_001163501	Elmsan1	chr12	84218881	84149173	-	chr12:84215701-84219700	4000	30.21	7.35	4.10598	0.000111234	0.0322374	promoter	1181
NR_040418	2310034G01Rik	chr19	46348988	46348200	-	chr19:46347301-46349300	2000	14.7	1.22	11.9593	0.000246768	0.0389464	promoter	688
NM_001252574	Slc35c2	chr2	165287787	165276521	-	chr2:165286601-165289500	2900	21.23	2.45	8.63415	3.59391e-05	0.0217706	promoter	-263
NM_001252573	Slc35c2	chr2	165287787	165276521	-	chr2:165286601-165289500	2900	21.23	2.45	8.63415	3.59391e-05	0.0217706	promoter	-263
NM_001252575	Slc35c2	chr2	165287838	165276521	-	chr2:165286601-165289500	2900	21.23	2.45	8.63415	3.59391e-05	0.0217706	promoter	-212
NM_144893	Slc35c2	chr2	165287838	165276521	-	chr2:165286601-165289500	2900	21.23	2.45	8.63415	3.59391e-05	0.0217706	promoter	-212
NR_045544	Slc35c2	chr2	165287838	165276521	-	chr2:165286601-165289500	2900	21.23	2.45	8.63415	3.59391e-05	0.0217706	promoter	-212
NM_023044	Slc15a3	chr19	10842543	10857915	+	chr19:10840701-10842600	1900	13.88	1.22	11.2927	0.000420465	0.0461418	promoter	-893
NM_010865	Myoc	chr1	162639149	162649694	+	chr1:162639801-162641700	1900	13.06	1.22	10.626	0.000715246	0.0508625	promoter	1601
NM_030238	Dync1h1	chr12	110601394	110666944	+	chr12:110598001-110603500	5500	46.54	18.37	2.53264	0.000377532	0.0461418	promoter	-644
NM_001164885	Lpin2	chr17	71204653	71249818	+	chr17:71204501-71207400	2900	21.23	2.45	8.63415	3.59391e-05	0.0217706	promoter	1297
NM_146435	Olfr993	chr2	85414877	85413932	-	chr2:85415701-85417100	1400	8.98	0	899	0.000417779	0.0461418	promoter	-1523
NM_144856	Slc22a7	chr17	46438477	46432184	-	chr17:46437001-46439400	2400	16.33	2.45	6.64228	0.000699507	0.0508625	promoter	277
NM_027706	Nbas	chr12	13269126	13583811	+	chr12:13268301-13269600	1300	8.98	0	899	0.000417779	0.0461418	promoter	-176
NM_021503	Myoz2	chr3	123034987	123006205	-	chr3:123033901-123037200	3300	21.23	2.45	8.63415	3.59391e-05	0.0217706	promoter	-563
NM_028607	Bloc1s2	chr19	44146446	44139246	-	chr19:44147701-44148900	1200	8.16	0	817	0.000767161	0.0508625	promoter	-1854
NM_001011832	Olfr1490	chr19	13654445	13655396	+	chr19:13653301-13655200	1900	13.06	1.22	10.626	0.000715246	0.0508625	promoter	-195
NM_021320	Ntn4	chr10	93641048	93745972	+	chr10:93640101-93641300	1200	8.98	0	899	0.000417779	0.0461418	promoter	-348
NM_030184	Armc9	chr1	86154779	86278284	+	chr1:86150801-86154900	4100	30.21	3.67	8.21196	1.11782e-06	0.00577456	promoter	-1929
NM_001310702	Armc9	chr1	86154779	86278284	+	chr1:86150801-86154900	4100	30.21	3.67	8.21196	1.11782e-06	0.00577456	promoter	-1929
NM_027456	Armc9	chr1	86154779	86252491	+	chr1:86150801-86154900	4100	30.21	3.67	8.21196	1.11782e-06	0.00577456	promoter	-1929
NM_172567	Mettl2	chr11	105126424	105141146	+	chr11:105122501-105126700	4200	26.13	6.12	4.26427	0.000257169	0.0398887	promoter	-1824
NM_010881	Ncoa1	chr12	4477182	4247361	-	chr12:4477401-4478700	1300	8.16	0	817	0.000767161	0.0508625	promoter	-868
NR_002854	Dlx1as	chr2	71537891	71530637	-	chr2:71538801-71540700	1900	13.88	1.22	11.2927	0.000420465	0.0461418	promoter	-1859
NR_040566	4930542D17Rik	chr16	50590502	50654166	+	chr16:50588701-50590300	1600	11.43	0	1144	6.86875e-05	0.0268853	promoter	-1002
NM_027046	Ccdc54	chr16	50591154	50589858	-	chr16:50588701-50590300	1600	11.43	0	1144	6.86875e-05	0.0268853	promoter	1654
NM_015763	Lpin1	chr12	16589770	16535668	-	chr12:16587501-16588700	1200	8.16	0	817	0.000767161	0.0508625	promoter	1670
NM_001130412	Lpin1	chr12	16589770	16535668	-	chr12:16587501-16588700	1200	8.16	0	817	0.000767161	0.0508625	promoter	1670
NM_172950	Lpin1	chr12	16589770	16535668	-	chr12:16587501-16588700	1200	8.16	0	817	0.000767161	0.0508625	promoter	1670
NM_019456	Apbb1ip	chr2	22774326	22875653	+	chr2:22775301-22776800	1500	9.8	0	981	0.000228261	0.0388555	promoter	1724
NM_001302203	Gpr87	chr3	59195104	59178913	-	chr3:59194301-59195500	1200	8.98	0	899	0.000417779	0.0461418	promoter	204
NM_001286002	Scyl3	chr1	163929099	163955126	+	chr1:163927401-163930000	2600	20.41	2.45	8.30081	5.93155e-05	0.0268853	promoter	-399
NM_028776	Scyl3	chr1	163929764	163955126	+	chr1:163927401-163930000	2600	20.41	2.45	8.30081	5.93155e-05	0.0268853	promoter	-1064
NM_001286003	Scyl3	chr1	163929764	163955126	+	chr1:163927401-163930000	2600	20.41	2.45	8.30081	5.93155e-05	0.0268853	promoter	-1064
NM_183103	Prss46	chr9	110844505	110856522	+	chr9:110843201-110845900	2700	18.78	3.67	5.10598	0.000856604	0.0508625	promoter	45
NM_147094	Olfr606	chr7	103451338	103452298	+	chr7:103449301-103451200	1900	13.88	1.22	11.2927	0.000420465	0.0461418	promoter	-1088
NM_001040111	Arap1	chr7	101348068	101412586	+	chr7:101347001-101348800	1800	13.06	0	1307	2.08452e-05	0.018268	promoter	-168
NM_001177403	Cebpzos	chr17	78916498	78921048	+	chr17:78914801-78920200	5400	39.19	9.8	3.99592	1.38836e-05	0.0164478	promoter	1002
NM_001177402	Cebpzos	chr17	78916498	78921048	+	chr17:78914801-78920200	5400	39.19	9.8	3.99592	1.38836e-05	0.0164478	promoter	1002
NM_013899	Timm10	chr2	84827020	84830213	+	chr2:84825501-84827800	2300	15.51	1.22	12.6179	0.00014461	0.0349564	promoter	-370
NM_001206684	2610528A11Rik	chr14	37110101	37102139	-	chr14:37110801-37111800	1000	8.98	0	899	0.000417779	0.0461418	promoter	-1199
NM_010576	Itga4	chr2	79255425	79333114	+	chr2:79255501-79258000	2500	22.05	1.22	17.935	1.93046e-06	0.00720704	promoter	1325
NM_029546	Pwp2	chr10	78185149	78170909	-	chr10:78185101-78186800	1700	8.98	0	899	0.000417779	0.0461418	promoter	-801
NM_009498	Vamp3	chr4	151057953	151047304	-	chr4:151056501-151058200	1700	13.06	0	1307	2.08452e-05	0.018268	promoter	603
NM_183177	Zfp811	chr17	32809931	32795675	-	chr17:32810401-32812000	1600	9.8	0	981	0.000228261	0.0388555	promoter	-1269
NM_001267583	Zfp811	chr17	32809931	32795675	-	chr17:32810401-32812000	1600	9.8	0	981	0.000228261	0.0388555	promoter	-1269
NM_008873	Plau	chr14	20836661	20843388	+	chr14:20836001-20841000	5000	38.38	12.25	3.13132	0.000168006	0.0375936	promoter	1839
NM_177782	Prex1	chr2	166713832	166566344	-	chr2:166708501-166715800	7300	59.6	25.72	2.31675	0.000199617	0.0388555	promoter	1682
NR_015529	R74862	chr7	143053686	143032620	-	chr7:143053501-143054900	1400	8.16	0	817	0.000767161	0.0508625	promoter	-514
NR_110355	R74862	chr7	143053686	143032620	-	chr7:143053501-143054900	1400	8.16	0	817	0.000767161	0.0508625	promoter	-514
NM_133655	Cd81	chr7	143052749	143067930	+	chr7:143053501-143054900	1400	8.16	0	817	0.000767161	0.0508625	promoter	1451
NR_110354	R74862	chr7	143053686	143021783	-	chr7:143053501-143054900	1400	8.16	0	817	0.000767161	0.0508625	promoter	-514
NM_001080798	Aff1	chr5	103754572	103855322	+	chr5:103752501-103755500	3000	18.78	1.22	15.2764	1.68413e-05	0.018268	promoter	-572
NM_133919	Aff1	chr5	103754161	103855322	+	chr5:103752501-103755500	3000	18.78	1.22	15.2764	1.68413e-05	0.018268	promoter	-161
NM_011623	Top2a	chr11	99024189	98992946	-	chr11:99022401-99024700	2300	14.7	1.22	11.9593	0.000246768	0.0389464	promoter	639
NR_040752	4930565D16Rik	chr3	84379921	84349375	-	chr3:84377401-84385200	7800	70.22	31.84	2.20502	0.000120175	0.0322374	promoter	-1379
NM_029337	Ep400	chr5	110770717	110664372	-	chr5:110770301-110771500	1200	8.16	0	817	0.000767161	0.0508625	promoter	-183
NM_173066	Ep400	chr5	110770717	110664372	-	chr5:110770301-110771500	1200	8.16	0	817	0.000767161	0.0508625	promoter	-183
NM_001167147	Gm8677	chr7	20545757	20544833	-	chr7:20543201-20546200	3000	22.86	4.9	4.65784	0.000383349	0.0461418	promoter	1057
NM_001167146	Gm5726	chr7	20545757	20544833	-	chr7:20543201-20546200	3000	22.86	4.9	4.65784	0.000383349	0.0461418	promoter	1057
NM_001159582	Pde1a	chr2	80129412	79834452	-	chr2:80128601-80130000	1400	8.16	0	817	0.000767161	0.0508625	promoter	112
NM_016744	Pde1a	chr2	80128971	79834452	-	chr2:80128601-80130000	1400	8.16	0	817	0.000767161	0.0508625	promoter	-329
NM_134079	Adk	chr14	21052573	21448569	+	chr14:21053201-21055100	1900	13.88	1.22	11.2927	0.000420465	0.0461418	promoter	1577
NM_018829	Ap3m1	chr14	21052442	21033741	-	chr14:21053201-21055100	1900	13.88	1.22	11.2927	0.000420465	0.0461418	promoter	-1708
NM_010346	Grb7	chr11	98446833	98455373	+	chr11:98445401-98447800	2400	16.33	1.22	13.2846	8.4628e-05	0.0303005	promoter	-233
NM_146907	Olfr1282	chr2	111336076	111335158	-	chr2:111333501-111335200	1700	11.43	0	1144	6.86875e-05	0.0268853	promoter	1726
NM_008029	Flt4	chr11	49609678	49652739	+	chr11:49608201-49610400	2200	16.33	2.45	6.64228	0.000699507	0.0508625	promoter	-378
NM_010228	Flt1	chr5	147725988	147562195	-	chr5:147722301-147728400	6100	40.82	15.92	2.56309	0.00077103	0.0508625	promoter	638
NM_021443	Ccl8	chr11	82115184	82116799	+	chr11:82115101-82117300	2200	21.23	3.67	5.77174	0.000216387	0.0388555	promoter	1016
NM_172404	Kyat1	chr2	30205699	30185130	-	chr2:30204901-30209800	4900	48.17	19.6	2.45691	0.000421143	0.0461418	promoter	-1651
NR_033625	D5Ertd605e	chr5	147418619	147423044	+	chr5:147418601-147420800	2200	16.33	1.22	13.2846	8.4628e-05	0.0303005	promoter	1081
NM_011607	Tnc	chr4	64047015	63959784	-	chr4:64044801-64046700	1900	12.25	0	1226	3.78041e-05	0.0217706	promoter	1265
NM_177038	Trappc8	chr18	20896078	20817223	-	chr18:20895801-20897800	2000	17.15	2.45	6.97561	0.000429473	0.0461418	promoter	-722
NM_029491	Trappc8	chr18	20896078	20846144	-	chr18:20895801-20897800	2000	17.15	2.45	6.97561	0.000429473	0.0461418	promoter	-722
NM_026179	Abhd5	chr9	122351615	122381523	+	chr9:122352301-122353500	1200	8.16	0	817	0.000767161	0.0508625	promoter	1285
NM_172706	9330182L06Rik	chr5	9266192	9480717	+	chr5:9265701-9267100	1400	8.98	0	899	0.000417779	0.0461418	promoter	208
NM_144539	Slamf7	chr1	171653037	171632402	-	chr1:171650801-171657700	6900	61.24	23.27	2.63101	2.60867e-05	0.0213872	promoter	-1213
NM_183248	Nkx6-2	chr7	139582797	139581219	-	chr7:139582301-139583900	1600	8.98	0	899	0.000417779	0.0461418	promoter	-303
NR_027857	Nkx6-2	chr7	139582797	139579375	-	chr7:139582301-139583900	1600	8.98	0	899	0.000417779	0.0461418	promoter	-303
NR_033563	Gpx2-ps1	chr7	100264543	100265561	+	chr7:100265501-100267400	1900	13.06	1.22	10.626	0.000715246	0.0508625	promoter	1907
NM_145496	Tkfc	chr19	10604258	10592196	-	chr19:10600201-10606000	5800	38.38	7.35	5.21603	1.56067e-06	0.00720704	promoter	1158
NR_029440	2010320M18Rik	chr8	70776861	70777606	+	chr8:70774801-70776700	1900	13.88	1.22	11.2927	0.000420465	0.0461418	promoter	-1111
NM_008841	Pik3r2	chr8	70776712	70768175	-	chr8:70774801-70776700	1900	13.88	1.22	11.2927	0.000420465	0.0461418	promoter	962
NR_030676	Phtf1os	chr3	103968316	103964535	-	chr3:103965801-103968800	3000	23.68	4.9	4.82485	0.000247429	0.0389464	promoter	1016
NM_013629	Phtf1	chr3	103968257	104007491	+	chr3:103965801-103968800	3000	23.68	4.9	4.82485	0.000247429	0.0389464	promoter	-957
NM_001163469	Phtf1	chr3	103968257	104007491	+	chr3:103965801-103968800	3000	23.68	4.9	4.82485	0.000247429	0.0389464	promoter	-957
NM_001163468	Phtf1	chr3	103968257	104007491	+	chr3:103965801-103968800	3000	23.68	4.9	4.82485	0.000247429	0.0389464	promoter	-957
NM_001163467	Phtf1	chr3	103968109	104007491	+	chr3:103965801-103968800	3000	23.68	4.9	4.82485	0.000247429	0.0389464	promoter	-809
NM_172726	E130309D02Rik	chr5	143315360	143301071	-	chr5:143312501-143317700	5200	57.15	11.02	5.18223	5.01086e-09	0.000233594	promoter	260
NM_175437	Gsap	chr5	21186266	21291701	+	chr5:21186301-21189000	2700	21.23	1.22	17.2683	3.32185e-06	0.00958685	promoter	1384
NM_153521	Lrrc41	chr4	116075268	116097109	+	chr4:116073301-116075200	1900	13.88	1.22	11.2927	0.000420465	0.0461418	promoter	-1018
NM_025641	Uqcrh	chr4	116075070	116066964	-	chr4:116073301-116075200	1900	13.88	1.22	11.2927	0.000420465	0.0461418	promoter	820
NM_001286502	Pdyn	chr2	129698658	129686548	-	chr2:129699601-129700600	1000	8.16	0	817	0.000767161	0.0508625	promoter	-1442
NM_018863	Pdyn	chr2	129699938	129686548	-	chr2:129699601-129700600	1000	8.16	0	817	0.000767161	0.0508625	promoter	-162
NM_001177303	Rara	chr11	98939710	98974942	+	chr11:98939601-98941500	1900	13.06	1.22	10.626	0.000715246	0.0508625	promoter	840
NM_177816	Sh2d4b	chr14	40892965	40815867	-	chr14:40893901-40895000	1100	8.98	0	899	0.000417779	0.0461418	promoter	-1485
NM_145437	Cd300ld	chr11	114989886	114982445	-	chr11:114990301-114991500	1200	8.98	0	899	0.000417779	0.0461418	promoter	-1014
NM_028072	Sulf2	chr2	166155683	166073898	-	chr2:166153501-166154700	1200	8.98	0	899	0.000417779	0.0461418	promoter	1583
NM_001252579	Sulf2	chr2	166155683	166073898	-	chr2:166153501-166154700	1200	8.98	0	899	0.000417779	0.0461418	promoter	1583
NM_001252578	Sulf2	chr2	166155285	166073898	-	chr2:166153501-166154700	1200	8.98	0	899	0.000417779	0.0461418	promoter	1185
NM_019726	Gps2	chr11	69914191	69916591	+	chr11:69911501-69915700	4200	37.56	11.02	3.40617	9.08341e-05	0.0317725	promoter	-591
NM_001163670	Tnnt3	chr7	142498835	142516009	+	chr7:142497201-142499100	1900	14.7	0	1471	6.36798e-06	0.0114397	promoter	-685
NM_001163669	Tnnt3	chr7	142498835	142516009	+	chr7:142497201-142499100	1900	14.7	0	1471	6.36798e-06	0.0114397	promoter	-685
NM_001163667	Tnnt3	chr7	142498835	142516009	+	chr7:142497201-142499100	1900	14.7	0	1471	6.36798e-06	0.0114397	promoter	-685
NM_001163664	Tnnt3	chr7	142498835	142516009	+	chr7:142497201-142499100	1900	14.7	0	1471	6.36798e-06	0.0114397	promoter	-685
NM_001163668	Tnnt3	chr7	142498835	142516009	+	chr7:142497201-142499100	1900	14.7	0	1471	6.36798e-06	0.0114397	promoter	-685
NM_001163666	Tnnt3	chr7	142498835	142516009	+	chr7:142497201-142499100	1900	14.7	0	1471	6.36798e-06	0.0114397	promoter	-685
NM_001163665	Tnnt3	chr7	142498835	142516009	+	chr7:142497201-142499100	1900	14.7	0	1471	6.36798e-06	0.0114397	promoter	-685
NM_011620	Tnnt3	chr7	142498835	142516009	+	chr7:142497201-142499100	1900	14.7	0	1471	6.36798e-06	0.0114397	promoter	-685
NM_001347546	Tnnt3	chr7	142498835	142516009	+	chr7:142497201-142499100	1900	14.7	0	1471	6.36798e-06	0.0114397	promoter	-685
NM_001347547	Tnnt3	chr7	142498835	142516009	+	chr7:142497201-142499100	1900	14.7	0	1471	6.36798e-06	0.0114397	promoter	-685
NM_001347552	Tnnt3	chr7	142498835	142516009	+	chr7:142497201-142499100	1900	14.7	0	1471	6.36798e-06	0.0114397	promoter	-685
NM_001347551	Tnnt3	chr7	142498835	142516009	+	chr7:142497201-142499100	1900	14.7	0	1471	6.36798e-06	0.0114397	promoter	-685
NM_001347550	Tnnt3	chr7	142498835	142516009	+	chr7:142497201-142499100	1900	14.7	0	1471	6.36798e-06	0.0114397	promoter	-685
NM_001347549	Tnnt3	chr7	142498835	142516009	+	chr7:142497201-142499100	1900	14.7	0	1471	6.36798e-06	0.0114397	promoter	-685
NM_001347548	Tnnt3	chr7	142498835	142516009	+	chr7:142497201-142499100	1900	14.7	0	1471	6.36798e-06	0.0114397	promoter	-685
NM_028274	Exosc6	chr8	111056338	111057664	+	chr8:111055501-111058000	2500	18.78	1.22	15.2764	1.68413e-05	0.018268	promoter	412
NM_001301259	Gm38667	chr18	36973801	37841872	+	chr18:36970701-36974900	4200	32.66	9.8	3.33028	0.000313618	0.0461418	promoter	-1001
NM_009957	Pcdha7	chr18	36973923	37187657	+	chr18:36970701-36974900	4200	32.66	9.8	3.33028	0.000313618	0.0461418	promoter	-1123
NM_146039	Wdr60	chr12	116263025	116207049	-	chr12:116260801-116264500	3700	38.38	14.7	2.60979	0.000938064	0.0508625	promoter	375
NM_026767	Dpm3	chr3	89266460	89267079	+	chr3:89263901-89269800	5900	53.07	23.27	2.28007	0.000546735	0.0508625	promoter	390
NM_026347	Iah1	chr12	21316391	21323607	+	chr12:21317401-21318800	1400	8.98	0	899	0.000417779	0.0461418	promoter	1709
NM_001347332	Pisd	chr5	32746342	32736300	-	chr5:32746501-32747800	1300	8.98	0	899	0.000417779	0.0461418	promoter	-808
NM_001310593	Mef2d	chr3	88142371	88172091	+	chr3:88137201-88144800	7600	69.4	34.29	2.02362	0.00049733	0.0508625	promoter	-1371
NM_001310587	Mef2d	chr3	88142371	88172091	+	chr3:88137201-88144800	7600	69.4	34.29	2.02362	0.00049733	0.0508625	promoter	-1371
NM_133665	Mef2d	chr3	88142371	88172091	+	chr3:88137201-88144800	7600	69.4	34.29	2.02362	0.00049733	0.0508625	promoter	-1371
NM_026381	Shisa5	chr9	109054865	109057792	+	chr9:109053901-109055000	1100	8.16	0	817	0.000767161	0.0508625	promoter	-415
NM_008774	Pabpc1	chr15	36608973	36595657	-	chr15:36604601-36609900	5300	56.34	22.05	2.5544	8.15223e-05	0.0303005	promoter	1723
NM_001085520	Gm12789	chr4	101986839	101990231	+	chr4:101987301-101988600	1300	8.16	0	817	0.000767161	0.0508625	promoter	1111
NM_009628	Adnp	chr2	168207112	168180964	-	chr2:168204101-168211500	7400	57.15	19.6	2.91484	1.18063e-05	0.0148891	promoter	-688
NM_001310086	Adnp	chr2	168207112	168180964	-	chr2:168204101-168211500	7400	57.15	19.6	2.91484	1.18063e-05	0.0148891	promoter	-688
NM_001310088	Adnp	chr2	168207112	168180964	-	chr2:168204101-168211500	7400	57.15	19.6	2.91484	1.18063e-05	0.0148891	promoter	-688
NM_029468	Zfp821	chr8	109706018	109724932	+	chr8:109704001-109709700	5700	47.36	19.6	2.4156	0.000571848	0.0508625	promoter	832
NM_001167946	Zfp821	chr8	109705545	109724932	+	chr8:109704001-109709700	5700	47.36	19.6	2.4156	0.000571848	0.0508625	promoter	1305
NM_001286393	Zfp821	chr8	109705545	109724932	+	chr8:109704001-109709700	5700	47.36	19.6	2.4156	0.000571848	0.0508625	promoter	1305
NM_001286391	Zfp821	chr8	109705545	109724932	+	chr8:109704001-109709700	5700	47.36	19.6	2.4156	0.000571848	0.0508625	promoter	1305
NM_030730	Rad54l2	chr9	106789213	106688079	-	chr9:106789301-106791200	1900	13.06	1.22	10.626	0.000715246	0.0508625	promoter	-1037
NM_001252440	D16Ertd472e	chr16	78576688	78540335	-	chr16:78574601-78579300	4700	43.27	14.7	2.94222	0.000124585	0.0322374	promoter	-262
NM_025967	D16Ertd472e	chr16	78576688	78540335	-	chr16:78574601-78579300	4700	43.27	14.7	2.94222	0.000124585	0.0322374	promoter	-262
NM_001252439	D16Ertd472e	chr16	78576688	78540335	-	chr16:78574601-78579300	4700	43.27	14.7	2.94222	0.000124585	0.0322374	promoter	-262
NM_001252438	D16Ertd472e	chr16	78576688	78540335	-	chr16:78574601-78579300	4700	43.27	14.7	2.94222	0.000124585	0.0322374	promoter	-262
NM_001267621	Gfi1	chr5	107725805	107716654	-	chr5:107725901-107726900	1000	8.98	0	899	0.000417779	0.0461418	promoter	-595
NR_033145	Dand5	chr8	84832265	84815404	-	chr8:84829801-84836900	7100	57.97	24.49	2.36653	0.000183818	0.0388555	promoter	-1085
NM_183358	Gadd45gip1	chr8	84832281	84835482	+	chr8:84829801-84836900	7100	57.97	24.49	2.36653	0.000183818	0.0388555	promoter	1069
NM_026148	Lims1	chr10	58323465	58424691	+	chr10:58321001-58322200	1200	8.16	0	817	0.000767161	0.0508625	promoter	-1865
NM_021300	Rhox4b	chrX	37432493	37437278	+	chrX:37431501-37433700	2200	19.6	3.67	5.3288	0.000543504	0.0508625	promoter	107
NM_021327	Tnip1	chr11	54962940	54910786	-	chr11:54958501-54963400	4900	38.38	12.25	3.13132	0.000168006	0.0375936	promoter	1990
NM_001271456	Tnip1	chr11	54962940	54910786	-	chr11:54958501-54963400	4900	38.38	12.25	3.13132	0.000168006	0.0375936	promoter	1990
NM_001271455	Tnip1	chr11	54962940	54910786	-	chr11:54958501-54963400	4900	38.38	12.25	3.13132	0.000168006	0.0375936	promoter	1990
NM_001199276	Tnip1	chr11	54962940	54910786	-	chr11:54958501-54963400	4900	38.38	12.25	3.13132	0.000168006	0.0375936	promoter	1990
NM_001199275	Tnip1	chr11	54962940	54910786	-	chr11:54958501-54963400	4900	38.38	12.25	3.13132	0.000168006	0.0375936	promoter	1990
NM_146306	Olfr518	chr7	108881604	108880602	-	chr7:108882601-108884200	1600	9.8	0	981	0.000228261	0.0388555	promoter	-1796
NM_021384	Rsad2	chr12	26456452	26442742	-	chr12:26455401-26461500	6100	45.72	15.92	2.87068	0.000105869	0.0322374	promoter	-1998
NM_134089	Scrib	chr15	76069784	76047162	-	chr15:76068101-76069600	1500	10.61	0	1062	0.000125063	0.0322374	promoter	934
NM_001310543	Scrib	chr15	76069784	76047162	-	chr15:76068101-76069600	1500	10.61	0	1062	0.000125063	0.0322374	promoter	934
NM_001310542	Scrib	chr15	76069784	76047162	-	chr15:76068101-76069600	1500	10.61	0	1062	0.000125063	0.0322374	promoter	934
NM_001081422	Bod1l	chr5	41844315	41787539	-	chr5:41845101-41846800	1700	9.8	0	981	0.000228261	0.0388555	promoter	-1635
NM_001310601	Bod1l	chr5	41844315	41787539	-	chr5:41845101-41846800	1700	9.8	0	981	0.000228261	0.0388555	promoter	-1635
NM_020277	Trpm5	chr7	143094642	143071528	-	chr7:143092201-143095300	3100	20.41	2.45	8.30081	5.93155e-05	0.0268853	promoter	892
NM_008533	Cd180	chr13	102693557	102706631	+	chr13:102691801-102695400	3600	23.68	6.12	3.8646	0.000891092	0.0508625	promoter	43
NM_175286	Tprn	chr2	25262597	25269886	+	chr2:25260001-25263500	3500	25.31	6.12	4.13051	0.000390731	0.0461418	promoter	-847
NM_008040	Fpr-rs3	chr17	20624877	20623845	-	chr17:20622401-20624700	2300	17.96	2.45	7.30488	0.000262875	0.0399562	promoter	1327
NM_019786	Tbk1	chr10	121586794	121546455	-	chr10:121583501-121587600	4100	29.39	6.12	4.79608	4.65552e-05	0.025061	promoter	1244
NM_007988	Fasn	chr11	120824547	120805957	-	chr11:120823101-120824500	1400	9.8	0	981	0.000228261	0.0388555	promoter	747
NM_172564	Tns4	chr11	99089306	99065677	-	chr11:99088801-99090000	1200	8.16	0	817	0.000767161	0.0508625	promoter	-94
NM_001025602	Il1rl1	chr1	40439628	40465414	+	chr1:40436501-40443300	6800	61.24	28.17	2.17353	0.000401326	0.0461418	promoter	272
NM_010743	Il1rl1	chr1	40439628	40448411	+	chr1:40436501-40443300	6800	61.24	28.17	2.17353	0.000401326	0.0461418	promoter	272
NM_017476	Akap8l	chr17	32350577	32321423	-	chr17:32350501-32351900	1400	9.8	0	981	0.000228261	0.0388555	promoter	-623
NM_021491	Smpd3	chr8	106337988	106252547	-	chr8:106335901-106338700	2800	21.23	3.67	5.77174	0.000216387	0.0388555	promoter	688
NM_001346583	Lin54	chr5	100500639	100442035	-	chr5:100498801-100503100	4300	32.66	6.12	5.32953	8.01792e-06	0.0132544	promoter	-311
NM_172714	Lin54	chr5	100500639	100442034	-	chr5:100498801-100503100	4300	32.66	6.12	5.32953	8.01792e-06	0.0132544	promoter	-311
NM_133714	Kansl2	chr15	98534269	98517657	-	chr15:98532201-98535100	2900	22.05	4.9	4.49287	0.00059165	0.0508625	promoter	619
NM_001289440	Kansl2	chr15	98534269	98517657	-	chr15:98532201-98535100	2900	22.05	4.9	4.49287	0.00059165	0.0508625	promoter	619
NM_001289439	Kansl2	chr15	98534269	98517657	-	chr15:98532201-98535100	2900	22.05	4.9	4.49287	0.00059165	0.0508625	promoter	619
NM_001289438	Kansl2	chr15	98534269	98517657	-	chr15:98532201-98535100	2900	22.05	4.9	4.49287	0.00059165	0.0508625	promoter	619
NM_001289437	Kansl2	chr15	98534269	98517657	-	chr15:98532201-98535100	2900	22.05	4.9	4.49287	0.00059165	0.0508625	promoter	619
NM_023126	Rab8a	chr8	72161199	72181366	+	chr8:72158501-72162500	4000	31.03	9.8	3.16412	0.000659609	0.0508625	promoter	-699
NM_177596	Zfp947	chr17	22165977	22144358	-	chr17:22164501-22168200	3700	26.94	6.12	4.39641	0.000168624	0.0375936	promoter	-373
NM_026171	Nvl	chr1	181144204	181087137	-	chr1:181141701-181145700	4000	30.21	7.35	4.10598	0.000111234	0.0322374	promoter	504
NR_131062	Exosc10	chr4	148558426	148582400	+	chr4:148556301-148559700	3400	25.31	4.9	5.15682	0.000101979	0.0322374	promoter	-426
NM_016699	Exosc10	chr4	148558426	148582400	+	chr4:148556301-148559700	3400	25.31	4.9	5.15682	0.000101979	0.0322374	promoter	-426
NR_131061	Exosc10	chr4	148558426	148582400	+	chr4:148556301-148559700	3400	25.31	4.9	5.15682	0.000101979	0.0322374	promoter	-426
NM_001034964	Sorbs1	chr19	40402310	40292039	-	chr19:40400601-40403600	3000	22.05	3.67	5.99457	0.000135845	0.0344171	promoter	210
NM_001081266	Ccdc142	chr6	83101515	83109121	+	chr6:83101801-83103700	1900	13.06	1.22	10.626	0.000715246	0.0508625	promoter	1235
NM_146061	Prr5	chr15	84680997	84703673	+	chr15:84678701-84682600	3900	31.03	7.35	4.21739	7.35843e-05	0.0281635	promoter	-347
NM_146153	Thrap3	chr4	126202710	126164082	-	chr4:126203201-126204500	1300	9.8	0	981	0.000228261	0.0388555	promoter	-1140
NM_183154	Zfyve1	chr12	83597147	83546940	-	chr12:83593301-83599300	6000	53.89	24.49	2.2	0.000776416	0.0508625	promoter	847
NM_008653	Mybpc3	chr2	91118143	91136516	+	chr2:91116101-91118400	2300	18.78	2.45	7.63821	0.000160448	0.0365666	promoter	-893
NM_146242	Lrrc10	chr10	117045340	117046768	+	chr10:117044401-117045500	1100	8.16	0	817	0.000767161	0.0508625	promoter	-390
NM_181328	Slc25a29	chr12	108835876	108825877	-	chr12:108836301-108838200	1900	13.06	0	1307	2.08452e-05	0.018268	promoter	-1374
NR_029773	Mir345	chr12	108836972	108837068	+	chr12:108836301-108838200	1900	13.06	0	1307	2.08452e-05	0.018268	promoter	278
NM_001190474	Dapk3	chr10	81183006	81193197	+	chr10:81182701-81184500	1800	13.06	1.22	10.626	0.000715246	0.0508625	promoter	594
NM_001190473	Dapk3	chr10	81183262	81193197	+	chr10:81182701-81184500	1800	13.06	1.22	10.626	0.000715246	0.0508625	promoter	338
NM_007828	Dapk3	chr10	81183917	81193197	+	chr10:81182701-81184500	1800	13.06	1.22	10.626	0.000715246	0.0508625	promoter	-317
NR_104446	Rtn1	chr12	72235746	72211748	-	chr12:72236401-72238100	1700	10.61	0	1062	0.000125063	0.0322374	promoter	-1504
NM_001007596	Rtn1	chr12	72236727	72211748	-	chr12:72236401-72238100	1700	10.61	0	1062	0.000125063	0.0322374	promoter	-523
NM_001042577	Lhx9	chr1	138842444	138830943	-	chr1:138841101-138842500	1400	8.98	0	899	0.000417779	0.0461418	promoter	644
NM_001025565	Lhx9	chr1	138842444	138825185	-	chr1:138841101-138842500	1400	8.98	0	899	0.000417779	0.0461418	promoter	644
NM_134003	Zc3h10	chr10	128547744	128543564	-	chr10:128546601-128548000	1400	8.16	0	817	0.000767161	0.0508625	promoter	444
NM_018860	Rpl41	chr10	128549168	128548109	-	chr10:128546601-128548000	1400	8.16	0	817	0.000767161	0.0508625	promoter	1868
NM_011277	Rnf2	chr1	151500823	151469405	-	chr1:151498301-151502300	4000	31.84	8.57	3.71212	0.000159344	0.0365666	promoter	523
NM_010579	Eif6	chr2	155826925	155819836	-	chr2:155822601-155828500	5900	48.99	18.37	2.66594	0.000144584	0.0349564	promoter	1375
NM_011446	Sox7	chr14	63943705	63950732	+	chr14:63944101-63946400	2300	16.33	1.22	13.2846	8.4628e-05	0.0303005	promoter	1545
NM_145396	Tbl3	chr17	24707653	24700652	-	chr17:24705901-24707900	2000	14.7	1.22	11.9593	0.000246768	0.0389464	promoter	753
NM_011743	Zfp106	chr2	120563859	120506819	-	chr2:120563201-120566200	3000	22.05	3.67	5.99457	0.000135845	0.0344171	promoter	-841
NR_111895	Stau1	chr2	166964717	166947548	-	chr2:166964701-166968200	3500	26.13	4.9	5.32383	6.51454e-05	0.0268853	promoter	-1733
NM_013676	Supt5	chr7	28338719	28314895	-	chr7:28339101-28340600	1500	8.16	0	817	0.000767161	0.0508625	promoter	-1131
NM_001278520	Prnd	chr2	131951036	131956131	+	chr2:131951801-131953100	1300	8.98	0	899	0.000417779	0.0461418	promoter	1414
NM_001278257	Prnd	chr2	131950860	131956131	+	chr2:131951801-131953100	1300	8.98	0	899	0.000417779	0.0461418	promoter	1590
NM_023043	Prnd	chr2	131950860	131956131	+	chr2:131951801-131953100	1300	8.98	0	899	0.000417779	0.0461418	promoter	1590
NM_001126338	Prnd	chr2	131950860	131956131	+	chr2:131951801-131953100	1300	8.98	0	899	0.000417779	0.0461418	promoter	1590
NM_024228	Gdpd3	chr7	126766413	126775645	+	chr7:126764401-126766400	2000	16.33	1.22	13.2846	8.4628e-05	0.0303005	promoter	-1013
NR_035437	Mir1899	chr9	8246785	8246881	+	chr9:8245001-8246400	1400	9.8	0	981	0.000228261	0.0388555	promoter	-1085
NM_009509	Vil1	chr1	74409383	74435560	+	chr1:74406101-74408900	2800	20.41	1.22	16.6016	5.71157e-06	0.0114397	promoter	-1883
NM_001080812	Cib3	chr8	72212837	72204334	-	chr8:72209001-72215000	6000	50.62	19.6	2.58185	0.000164838	0.0375304	promoter	837
NM_134100	Mfsd5	chr15	102279455	102281744	+	chr15:102277401-102282100	4700	38.38	14.7	2.60979	0.000938064	0.0508625	promoter	295
NM_001037722	Adam15	chr3	89350028	89339639	-	chr3:89345501-89351500	6000	49.81	15.92	3.12743	1.84925e-05	0.018268	promoter	1528
NM_009614	Adam15	chr3	89350028	89339639	-	chr3:89345501-89351500	6000	49.81	15.92	3.12743	1.84925e-05	0.018268	promoter	1528
NM_001163709	Bri3	chr5	144244436	144264573	+	chr5:144243901-144246600	2700	19.6	3.67	5.3288	0.000543504	0.0508625	promoter	814
NM_010501	Ifit3	chr19	34583528	34588982	+	chr19:34581201-34588700	7500	68.59	28.17	2.43435	3.00963e-05	0.0217706	promoter	1422
NM_134084	Ppif	chr14	25694169	25700466	+	chr14:25695001-25696000	1000	8.16	0	817	0.000767161	0.0508625	promoter	1331
NM_001290737	Thg1l	chr11	45955188	45945305	-	chr11:45955001-45956200	1200	8.16	0	817	0.000767161	0.0508625	promoter	-412
NM_001080969	Thg1l	chr11	45955503	45945305	-	chr11:45955001-45956200	1200	8.16	0	817	0.000767161	0.0508625	promoter	-97
NM_001291539	Sema3b	chr9	107609241	107597673	-	chr9:107609001-107611400	2400	21.23	4.9	4.32587	0.00090941	0.0508625	promoter	-959
NM_001042779	Sema3b	chr9	107609241	107597673	-	chr9:107609001-107611400	2400	21.23	4.9	4.32587	0.00090941	0.0508625	promoter	-959
NM_018767	Cd160	chr3	96814521	96798762	-	chr3:96814301-96817400	3100	24.49	6.12	3.99674	0.000591303	0.0508625	promoter	-1329
NM_010847	Mxi1	chr19	53329412	53375810	+	chr19:53329901-53332400	2500	18.78	3.67	5.10598	0.000856604	0.0508625	promoter	1738
NM_001008543	Mxi1	chr19	53330445	53375810	+	chr19:53329901-53332400	2500	18.78	3.67	5.10598	0.000856604	0.0508625	promoter	705
NM_018819	Mpc1	chr17	8283812	8297661	+	chr17:8282901-8284800	1900	16.33	2.45	6.64228	0.000699507	0.0508625	promoter	38
NM_027949	Phf7	chr14	31251218	31237695	-	chr14:31249001-31250800	1800	13.06	1.22	10.626	0.000715246	0.0508625	promoter	1318
NM_027088	Bap1	chr14	31251488	31259929	+	chr14:31249001-31250800	1800	13.06	1.22	10.626	0.000715246	0.0508625	promoter	-1588
NM_027410	Tecpr1	chr5	144223578	144195346	-	chr5:144219501-144225900	6400	55.52	19.6	2.83172	2.32155e-05	0.0192058	promoter	878
NM_001167963	G2e3	chr12	51348229	51376986	+	chr12:51346601-51352200	5600	44.09	17.15	2.56993	0.000460004	0.0488646	promoter	1171
NM_001167964	G2e3	chr12	51348229	51376986	+	chr12:51346601-51352200	5600	44.09	17.15	2.56993	0.000460004	0.0488646	promoter	1171
NM_001015099	G2e3	chr12	51348229	51376986	+	chr12:51346601-51352200	5600	44.09	17.15	2.56993	0.000460004	0.0488646	promoter	1171
NM_033617	Atp6v0b	chr4	117887329	117884329	-	chr4:117886301-117888300	2000	16.33	1.22	13.2846	8.4628e-05	0.0303005	promoter	29
NM_007439	Alk	chr17	72604307	71868987	-	chr17:72602701-72603800	1100	8.16	0	817	0.000767161	0.0508625	promoter	1057
NR_046038	4933404K08Rik	chr13	23278349	23282267	+	chr13:23276501-23277900	1400	9.8	0	981	0.000228261	0.0388555	promoter	-1149
NM_023680	Tnfrsf22	chr7	143649664	143634807	-	chr7:143648101-143652000	3900	26.94	2.45	10.9553	1.02206e-06	0.00577456	promoter	-386
NM_001311145	Tnfrsf22	chr7	143649664	143634807	-	chr7:143648101-143652000	3900	26.94	2.45	10.9553	1.02206e-06	0.00577456	promoter	-386
NM_001278269	Fyb	chr15	6579846	6665608	+	chr15:6578801-6582000	3200	27.76	2.45	11.2886	6.10767e-07	0.00470618	promoter	554
NM_011815	Fyb	chr15	6579846	6665608	+	chr15:6578801-6582000	3200	27.76	2.45	11.2886	6.10767e-07	0.00470618	promoter	554
NM_026443	Mtfp1	chr11	4095431	4091480	-	chr11:4094701-4097700	3000	26.13	7.35	3.55163	0.000830612	0.0508625	promoter	-769
NM_011764	Zfp90	chr8	106415338	106425889	+	chr8:106414801-106416500	1700	9.8	0	981	0.000228261	0.0388555	promoter	312
NM_178873	Adck2	chr6	39573875	39588769	+	chr6:39574001-39575000	1000	8.16	0	817	0.000767161	0.0508625	promoter	625
NM_153791	Flywch1	chr17	23771591	23755422	-	chr17:23770701-23771900	1200	8.16	0	817	0.000767161	0.0508625	promoter	291
NR_040633	4930555B11Rik	chr2	57181830	57188257	+	chr2:57182301-57184300	2000	14.7	1.22	11.9593	0.000246768	0.0389464	promoter	1470
NR_040356	BB557941	chr2	57181754	57127476	-	chr2:57182301-57184300	2000	14.7	1.22	11.9593	0.000246768	0.0389464	promoter	-1546
NM_001277939	Rad51d	chr11	82890624	82871960	-	chr11:82888301-82890100	1800	13.06	0	1307	2.08452e-05	0.018268	promoter	1424
NM_001277941	Rad51d	chr11	82890624	82873062	-	chr11:82888301-82890100	1800	13.06	0	1307	2.08452e-05	0.018268	promoter	1424
NM_001277938	Rad51d	chr11	82890624	82873062	-	chr11:82888301-82890100	1800	13.06	0	1307	2.08452e-05	0.018268	promoter	1424
NM_011235	Rad51d	chr11	82890624	82873062	-	chr11:82888301-82890100	1800	13.06	0	1307	2.08452e-05	0.018268	promoter	1424
NM_001277942	Rad51d	chr11	82890624	82873062	-	chr11:82888301-82890100	1800	13.06	0	1307	2.08452e-05	0.018268	promoter	1424
NR_102719	Rad51d	chr11	82890624	82873062	-	chr11:82888301-82890100	1800	13.06	0	1307	2.08452e-05	0.018268	promoter	1424
NR_102718	Rad51d	chr11	82890624	82873062	-	chr11:82888301-82890100	1800	13.06	0	1307	2.08452e-05	0.018268	promoter	1424
NR_102717	Rad51d	chr11	82890624	82873062	-	chr11:82888301-82890100	1800	13.06	0	1307	2.08452e-05	0.018268	promoter	1424
NR_102720	Rad51d	chr11	82890624	82873062	-	chr11:82888301-82890100	1800	13.06	0	1307	2.08452e-05	0.018268	promoter	1424
NM_001347060	Cfap54	chr10	93081596	92775615	-	chr10:93081601-93084100	2500	16.33	2.45	6.64228	0.000699507	0.0508625	promoter	-1254
NR_110496	A330074K22Rik	chr8	120228230	120204433	-	chr8:120225901-120227800	1900	14.7	1.22	11.9593	0.000246768	0.0389464	promoter	1380
NM_010499	Ier2	chr8	84662852	84661330	-	chr8:84664001-84665600	1600	10.61	0	1062	0.000125063	0.0322374	promoter	-1948
NR_131140	Gm6093	chr13	33568869	33562485	-	chr13:33569101-33571500	2400	18.78	2.45	7.63821	0.000160448	0.0365666	promoter	-1431
NR_131141	Gm6093	chr13	33569317	33562485	-	chr13:33569101-33571500	2400	18.78	2.45	7.63821	0.000160448	0.0365666	promoter	-983
NM_198634	Tigd3	chr19	5894107	5891137	-	chr19:5894101-5895700	1600	10.61	0	1062	0.000125063	0.0322374	promoter	-793
NM_001042565	Wsb1	chr11	79243024	79239382	-	chr11:79240701-79246200	5500	41.64	14.7	2.83141	0.000247752	0.0389464	promoter	-426
NM_028298	Zfp655	chr5	145231758	145247306	+	chr5:145230101-145232600	2500	21.23	4.9	4.32587	0.00090941	0.0508625	promoter	-408
NM_001083958	Zfp655	chr5	145231714	145238322	+	chr5:145230101-145232600	2500	21.23	4.9	4.32587	0.00090941	0.0508625	promoter	-364
NM_001347533	Zfp655	chr5	145231724	145237848	+	chr5:145230101-145232600	2500	21.23	4.9	4.32587	0.00090941	0.0508625	promoter	-374
NM_001081020	Adamts6	chr13	104287834	104496695	+	chr13:104283301-104289500	6200	43.27	14.7	2.94222	0.000124585	0.0322374	promoter	-1434
NR_136938	Adamts6	chr13	104287834	104496695	+	chr13:104283301-104289500	6200	43.27	14.7	2.94222	0.000124585	0.0322374	promoter	-1434
NM_001287389	Csf2rb2	chr15	78305721	78282507	-	chr15:78302501-78310700	8200	63.69	28.17	2.26047	0.000173531	0.0386507	promoter	-879
NM_007781	Csf2rb2	chr15	78305721	78282507	-	chr15:78302501-78310700	8200	63.69	28.17	2.26047	0.000173531	0.0386507	promoter	-879
NR_027396	Rnf44	chr13	54693960	54679398	-	chr13:54693701-54694700	1000	8.16	0	817	0.000767161	0.0508625	promoter	-240
NR_027395	Rnf44	chr13	54693960	54679398	-	chr13:54693701-54694700	1000	8.16	0	817	0.000767161	0.0508625	promoter	-240
NM_007817	Cyp2f2	chr7	27119954	27133660	+	chr7:27118101-27119200	1100	8.16	0	817	0.000767161	0.0508625	promoter	-1304
NM_053262	Hsd17b11	chr5	104021796	103989764	-	chr5:104022401-104023500	1100	8.16	0	817	0.000767161	0.0508625	promoter	-1154
NM_172297	Ccdc9	chr7	16284659	16275463	-	chr7:16283401-16284500	1100	8.16	0	817	0.000767161	0.0508625	promoter	709
NM_178692	C130074G19Rik	chr1	184883036	184871925	-	chr1:184884301-184885400	1100	8.98	0	899	0.000417779	0.0461418	promoter	-1814
NM_020581	Angptl4	chr17	33781575	33774899	-	chr17:33779001-33780900	1900	13.06	1.22	10.626	0.000715246	0.0508625	promoter	1625
NM_001130454	Nfe2l1	chr11	96824013	96817413	-	chr11:96824301-96825500	1200	8.16	0	817	0.000767161	0.0508625	promoter	-887
NM_001130453	Nfe2l1	chr11	96824013	96817413	-	chr11:96824301-96825500	1200	8.16	0	817	0.000767161	0.0508625	promoter	-887
NM_001130452	Nfe2l1	chr11	96824127	96817413	-	chr11:96824301-96825500	1200	8.16	0	817	0.000767161	0.0508625	promoter	-773
NM_001130451	Nfe2l1	chr11	96824127	96817413	-	chr11:96824301-96825500	1200	8.16	0	817	0.000767161	0.0508625	promoter	-773
NM_001166718	Vmn1r173	chr7	23702341	23703283	+	chr7:23701001-23702000	1000	8.16	0	817	0.000767161	0.0508625	promoter	-841
NM_001033145	1190002N15Rik	chr9	94538081	94517863	-	chr9:94537101-94538100	1000	8.16	0	817	0.000767161	0.0508625	promoter	481
NM_001347593	Ptprg	chr14	12189942	12242041	+	chr14:12189101-12191000	1900	13.88	1.22	11.2927	0.000420465	0.0461418	promoter	108
NM_029090	Naa60	chr16	3884618	3904781	+	chr16:3882701-3886000	3300	23.68	2.45	9.63008	7.89697e-06	0.0132544	promoter	-268
NM_001290689	Naa60	chr16	3884618	3904781	+	chr16:3882701-3886000	3300	23.68	2.45	9.63008	7.89697e-06	0.0132544	promoter	-268
NM_021438	Fibp	chr19	5460606	5465052	+	chr19:5459801-5464600	4800	35.11	11.02	3.18404	0.00027684	0.0419148	promoter	1594
NM_001253832	Fibp	chr19	5460606	5465052	+	chr19:5459801-5464600	4800	35.11	11.02	3.18404	0.00027684	0.0419148	promoter	1594
NM_010918	Nktr	chr9	121719180	121756841	+	chr9:121717501-121718800	1300	8.98	0	899	0.000417779	0.0461418	promoter	-1030
NM_024479	Mettl27	chr5	134932372	134942637	+	chr5:134932601-134933700	1100	8.16	0	817	0.000767161	0.0508625	promoter	778
NM_001347490	Mettl27	chr5	134932372	134942637	+	chr5:134932601-134933700	1100	8.16	0	817	0.000767161	0.0508625	promoter	778
NM_029100	Selenon	chr4	134552166	134537891	-	chr4:134550201-134552000	1800	12.25	0	1226	3.78041e-05	0.0217706	promoter	1066
NM_001291075	Gtf2h1	chr7	46796670	46823800	+	chr7:46796601-46798500	1900	11.43	0	1144	6.86875e-05	0.0268853	promoter	880
NM_001167864	Hps5	chr7	46795881	46760465	-	chr7:46796601-46798500	1900	11.43	0	1144	6.86875e-05	0.0268853	promoter	-1669
NM_001005248	Hps5	chr7	46795881	46760465	-	chr7:46796601-46798500	1900	11.43	0	1144	6.86875e-05	0.0268853	promoter	-1669
NM_001005247	Hps5	chr7	46795881	46760465	-	chr7:46796601-46798500	1900	11.43	0	1144	6.86875e-05	0.0268853	promoter	-1669
NM_008186	Gtf2h1	chr7	46796093	46823800	+	chr7:46796601-46798500	1900	11.43	0	1144	6.86875e-05	0.0268853	promoter	1457
NM_009316	Map3k7	chr4	31964106	32023466	+	chr4:31963301-31964300	1000	8.16	0	817	0.000767161	0.0508625	promoter	-306
NM_172688	Map3k7	chr4	31964106	32023466	+	chr4:31963301-31964300	1000	8.16	0	817	0.000767161	0.0508625	promoter	-306
NM_009460	Sumo1	chr1	59670834	59639433	-	chr1:59667401-59673400	6000	48.99	19.6	2.49873	0.000309089	0.0461418	promoter	434
NM_001308425	2310009A05Rik	chr9	73039717	73042782	+	chr9:73040901-73042100	1200	8.98	0	899	0.000417779	0.0461418	promoter	1783
NM_018889	Pigb	chr9	73039699	73015695	-	chr9:73040901-73042100	1200	8.98	0	899	0.000417779	0.0461418	promoter	-1801
NM_001290548	Fubp3	chr2	31572650	31617526	+	chr2:31570701-31573300	2600	22.86	3.67	6.21467	8.50175e-05	0.0303005	promoter	-650
NM_001033389	Fubp3	chr2	31572650	31617526	+	chr2:31570701-31573300	2600	22.86	3.67	6.21467	8.50175e-05	0.0303005	promoter	-650
NM_001135100	Il34	chr8	110805924	110741828	-	chr8:110804901-110807400	2500	17.15	2.45	6.97561	0.000429473	0.0461418	promoter	-226
NM_029646	Il34	chr8	110805924	110741828	-	chr8:110804901-110807400	2500	17.15	2.45	6.97561	0.000429473	0.0461418	promoter	-226
NM_001291046	Nudt3	chr17	27622964	27579381	-	chr17:27619601-27622800	3200	21.23	4.9	4.32587	0.00090941	0.0508625	promoter	1764
NM_028263	Fgfbp3	chr19	36919599	36917549	-	chr19:36919401-36923100	3700	28.58	6.12	4.66395	7.17334e-05	0.0277024	promoter	-1651
NM_001163131	Elf3	chr1	135258472	135253573	-	chr1:135257601-135260600	3000	25.31	4.9	5.15682	0.000101979	0.0322374	promoter	-628
NM_007921	Elf3	chr1	135258472	135253573	-	chr1:135257601-135260600	3000	25.31	4.9	5.15682	0.000101979	0.0322374	promoter	-628
NM_001001186	Zfp456	chr13	67375763	67363583	-	chr13:67374401-67376300	1900	13.88	1.22	11.2927	0.000420465	0.0461418	promoter	413
NM_148925	Fyco1	chr9	123851661	123789499	-	chr9:123849701-123850900	1200	8.16	0	817	0.000767161	0.0508625	promoter	1361
NM_001110253	Fyco1	chr9	123851899	123789499	-	chr9:123849701-123850900	1200	8.16	0	817	0.000767161	0.0508625	promoter	1599
NM_001080818	Cdc14a	chr3	116424032	116272552	-	chr3:116423201-116427200	4000	29.39	7.35	3.99457	0.000167564	0.0375936	promoter	-1168
NM_001173553	Cdc14a	chr3	116424032	116272552	-	chr3:116423201-116427200	4000	29.39	7.35	3.99457	0.000167564	0.0375936	promoter	-1168
NM_001135559	Sos2	chr12	69681852	69583760	-	chr12:69682901-69684800	1900	13.06	1.22	10.626	0.000715246	0.0508625	promoter	-1998
NM_146846	Olfr1087	chr2	86690973	86690031	-	chr2:86690601-86692200	1600	8.98	0	899	0.000417779	0.0461418	promoter	-427
NM_001145900	Btbd6	chr12	112976481	112978940	+	chr12:112974301-112980000	5700	52.26	23.27	2.24527	0.00072862	0.0508625	promoter	669
NM_201646	Btbd6	chr12	112976562	112978940	+	chr12:112974301-112980000	5700	52.26	23.27	2.24527	0.00072862	0.0508625	promoter	588
NR_002841	Rn4.5s	chr6	47663755	47663581	-	chr6:47660601-47667400	6800	135.54	67.36	2.01202	1.34305e-06	0.00661959	promoter	-245
NM_175430	Ccdc40	chr11	119228571	119265212	+	chr11:119228501-119229800	1300	8.16	0	817	0.000767161	0.0508625	promoter	579
NM_001347625	Tbc1d16	chr11	119228499	119143044	-	chr11:119228501-119229800	1300	8.16	0	817	0.000767161	0.0508625	promoter	-651
NM_172443	Tbc1d16	chr11	119228499	119143042	-	chr11:119228501-119229800	1300	8.16	0	817	0.000767161	0.0508625	promoter	-651
NM_028820	1700017B05Rik	chr9	57262599	57252321	-	chr9:57263101-57265000	1900	13.06	1.22	10.626	0.000715246	0.0508625	promoter	-1451
NM_001185164	Vegfb	chr19	6987651	6982471	-	chr19:6987501-6989000	1500	8.98	0	899	0.000417779	0.0461418	promoter	-599
NM_011697	Vegfb	chr19	6987651	6982471	-	chr19:6987501-6989000	1500	8.98	0	899	0.000417779	0.0461418	promoter	-599
NM_009093	Rps29	chr12	69159186	69157721	-	chr12:69156101-69163000	6900	52.26	14.7	3.55337	2.28031e-06	0.00824047	promoter	-364
NM_001167991	Hook2	chr8	84990594	85003364	+	chr8:84989301-84991400	2100	15.51	1.22	12.6179	0.00014461	0.0349564	promoter	-244
NM_133255	Hook2	chr8	84990594	85003364	+	chr8:84989301-84991400	2100	15.51	1.22	12.6179	0.00014461	0.0349564	promoter	-244
NM_011203	Ptpn12	chr5	21055797	20986644	-	chr5:21054501-21056400	1900	12.25	0	1226	3.78041e-05	0.0217706	promoter	347
NM_001287261	Mst1r	chr9	107915002	107920383	+	chr9:107914401-107916200	1800	12.25	0	1226	3.78041e-05	0.0217706	promoter	298
NM_146100	Ina	chr19	47014697	47024346	+	chr19:47012301-47013500	1200	8.16	0	817	0.000767161	0.0508625	promoter	-1797
NM_009766	Brs3	chrX	57043073	57048758	+	chrX:57043101-57045100	2000	17.15	1.22	13.9512	4.94638e-05	0.0251185	promoter	1027
NM_019766	Ptges3	chr10	128058981	128077254	+	chr10:128057601-128062200	4600	29.39	7.35	3.99457	0.000167564	0.0375936	promoter	919
NR_045895	Gm13546	chr2	58163973	58177063	+	chr2:58163301-58165400	2100	14.7	1.22	11.9593	0.000246768	0.0389464	promoter	377
NR_045896	Gm13546	chr2	58163973	58177063	+	chr2:58163301-58165400	2100	14.7	1.22	11.9593	0.000246768	0.0389464	promoter	377
NM_025556	Coprs	chr8	13890271	13884787	-	chr8:13888601-13891300	2700	20.41	3.67	5.54891	0.000343545	0.0461418	promoter	321
NR_036459	A730018C14Rik	chr12	112423198	112411022	-	chr12:112423101-112426200	3100	26.13	4.9	5.32383	6.51454e-05	0.0268853	promoter	-1452
NM_019822	Adrm1	chr2	180171587	180176283	+	chr2:180170401-180174700	4300	31.03	8.57	3.61772	0.000235987	0.0389464	promoter	963
NM_053233	Vmn1r11	chr6	57137352	57138252	+	chr6:57136801-57138700	1900	13.06	0	1307	2.08452e-05	0.018268	promoter	398
NM_018759	Zfp326	chr5	105876567	105915820	+	chr5:105875401-105878700	3300	22.86	4.9	4.65784	0.000383349	0.0461418	promoter	483
NR_030777	Zfp326	chr5	105876567	105915820	+	chr5:105875401-105878700	3300	22.86	4.9	4.65784	0.000383349	0.0461418	promoter	483
NM_001099688	Fbxo39	chr11	72314443	72319419	+	chr11:72315401-72316800	1400	8.98	0	899	0.000417779	0.0461418	promoter	1657
NR_028480	Gm12238	chr11	55482705	55482829	+	chr11:55482101-55486600	4500	35.93	7.35	4.88315	5.77755e-06	0.0114397	promoter	1645
NM_009459	Ube2h	chr6	30304539	30211289	-	chr6:30301901-30303300	1400	8.98	0	899	0.000417779	0.0461418	promoter	1939
NM_001169576	Ube2h	chr6	30304539	30211289	-	chr6:30301901-30303300	1400	8.98	0	899	0.000417779	0.0461418	promoter	1939
NM_026535	Serpina12	chr12	104044443	104028768	-	chr12:104041101-104044800	3700	33.48	11.02	3.03626	0.000571211	0.0508625	promoter	1493
NM_013517	Fcer2a	chr8	3694174	3681736	-	chr8:3692601-3694600	2000	14.7	1.22	11.9593	0.000246768	0.0389464	promoter	574
NM_001253747	Fcer2a	chr8	3694174	3681736	-	chr8:3692601-3694600	2000	14.7	1.22	11.9593	0.000246768	0.0389464	promoter	574
NM_001253743	Fcer2a	chr8	3694174	3681736	-	chr8:3692601-3694600	2000	14.7	1.22	11.9593	0.000246768	0.0389464	promoter	574
NM_178610	Krr1	chr10	111972694	111988430	+	chr10:111972701-111974500	1800	10.61	0	1062	0.000125063	0.0322374	promoter	906
NM_001277122	Hnrnpr	chr4	136310941	136345979	+	chr4:136309601-136311500	1900	13.88	1.22	11.2927	0.000420465	0.0461418	promoter	-391
NM_001277121	Hnrnpr	chr4	136310941	136345979	+	chr4:136309601-136311500	1900	13.88	1.22	11.2927	0.000420465	0.0461418	promoter	-391
NM_028871	Hnrnpr	chr4	136310941	136345979	+	chr4:136309601-136311500	1900	13.88	1.22	11.2927	0.000420465	0.0461418	promoter	-391
NM_001277123	Hnrnpr	chr4	136310941	136345979	+	chr4:136309601-136311500	1900	13.88	1.22	11.2927	0.000420465	0.0461418	promoter	-391
NM_027514	Pvr	chr7	19921143	19903577	-	chr7:19921301-19924000	2700	16.33	1.22	13.2846	8.4628e-05	0.0303005	promoter	-1507
NM_201352	Gdpd5	chr7	99381548	99460984	+	chr7:99382901-99384100	1200	8.98	0	899	0.000417779	0.0461418	promoter	1952
NM_001083927	Tle3	chr9	61372365	61418497	+	chr9:61371501-61374700	3200	21.23	3.67	5.77174	0.000216387	0.0388555	promoter	735
NM_009389	Tle3	chr9	61372365	61418497	+	chr9:61371501-61374700	3200	21.23	3.67	5.77174	0.000216387	0.0388555	promoter	735
NM_001083928	Tle3	chr9	61372365	61418497	+	chr9:61371501-61374700	3200	21.23	3.67	5.77174	0.000216387	0.0388555	promoter	735
NM_001037723	Adcy7	chr8	88289065	88329962	+	chr8:88286801-88289400	2600	22.86	4.9	4.65784	0.000383349	0.0461418	promoter	-965
NM_009168	Shd	chr17	55970481	55976619	+	chr17:55968401-55970300	1900	13.06	1.22	10.626	0.000715246	0.0508625	promoter	-1131
NM_001159523	Shd	chr17	55970481	55976619	+	chr17:55968401-55970300	1900	13.06	1.22	10.626	0.000715246	0.0508625	promoter	-1131
NM_026993	Ddah1	chr3	145758691	145894277	+	chr3:145757401-145759300	1900	13.06	1.22	10.626	0.000715246	0.0508625	promoter	-341
NR_030434	Mir763	chr10	120448110	120447990	-	chr10:120447201-120448500	1300	8.98	0	899	0.000417779	0.0461418	promoter	260
NM_027324	Sfxn1	chr13	54071844	54108345	+	chr13:54068401-54077100	8700	65.32	20.82	3.13634	8.96726e-07	0.00577456	promoter	906
NM_144907	Sesn2	chr4	132510456	132492806	-	chr4:132508501-132510400	1900	11.43	0	1144	6.86875e-05	0.0268853	promoter	1006
NM_172120	Vps41	chr13	18717291	18866811	+	chr13:18716701-18718900	2200	19.6	2.45	7.97154	9.76745e-05	0.0322374	promoter	509
NM_001083934	Myom1	chr17	71019556	71126856	+	chr17:71018501-71021200	2700	22.86	2.45	9.29675	1.31117e-05	0.0156726	promoter	294
NM_010867	Myom1	chr17	71019556	71126856	+	chr17:71018501-71021200	2700	22.86	2.45	9.29675	1.31117e-05	0.0156726	promoter	294
NM_001302702	Ncoa2	chr1	13372429	13139104	-	chr1:13369401-13373100	3700	32.66	7.35	4.43886	3.18865e-05	0.0217706	promoter	1179
NR_106035	Mir6769b	chr8	71631106	71631046	-	chr8:71627901-71630600	2700	22.86	2.45	9.29675	1.31117e-05	0.0156726	promoter	1856
NM_001286662	Pdpk1	chr17	24150922	24073679	-	chr17:24149901-24151300	1400	8.98	0	899	0.000417779	0.0461418	promoter	322
NM_001033394	Tmem88b	chr4	155785874	155781590	-	chr4:155785101-155787900	2800	18.78	3.67	5.10598	0.000856604	0.0508625	promoter	-626
NM_001316680	Ptpre	chr7	135593480	135686294	+	chr7:135591601-135593000	1400	9.8	0	981	0.000228261	0.0388555	promoter	-1180
NM_001256122	Limch1	chr5	66968415	67057159	+	chr5:66966301-66967500	1200	9.8	0	981	0.000228261	0.0388555	promoter	-1515
NM_008757	Odf1	chr15	38219202	38226735	+	chr15:38216901-38218900	2000	14.7	0	1471	6.36798e-06	0.0114397	promoter	-1302
NM_008162	Gpx4	chr10	80053487	80056439	+	chr10:80053401-80056000	2600	20.41	3.67	5.54891	0.000343545	0.0461418	promoter	1213
NM_001037741	Gpx4	chr10	80054018	80056439	+	chr10:80053401-80056000	2600	20.41	3.67	5.54891	0.000343545	0.0461418	promoter	682
NM_008024	Foxl1	chr8	121127684	121130644	+	chr8:121127601-121128600	1000	8.16	0	817	0.000767161	0.0508625	promoter	416
NM_028193	Brf1	chr12	113000621	112959861	-	chr12:112999401-113003400	4000	39.19	13.47	2.90801	0.000292962	0.0441693	promoter	-779
NM_178622	Suds3	chr5	117115993	117091677	-	chr5:117116601-117117700	1100	8.16	0	817	0.000767161	0.0508625	promoter	-1157
NM_001122666	Suds3	chr5	117115993	117091677	-	chr5:117116601-117117700	1100	8.16	0	817	0.000767161	0.0508625	promoter	-1157
NM_011452	Serpinb9b	chr13	33027413	33040558	+	chr13:33024901-33028400	3500	29.39	8.57	3.42657	0.00051168	0.0508625	promoter	-763
NM_028732	Vsir	chr10	60346850	60372684	+	chr10:60346701-60349400	2700	17.96	2.45	7.30488	0.000262875	0.0399562	promoter	1200
NM_001159572	Vsir	chr10	60346850	60372684	+	chr10:60346701-60349400	2700	17.96	2.45	7.30488	0.000262875	0.0399562	promoter	1200
NM_001164155	Tnfrsf19	chr14	61037987	60963833	-	chr14:61036301-61038000	1700	11.43	0	1144	6.86875e-05	0.0268853	promoter	837
NM_145575	Cald1	chr6	34709443	34775469	+	chr6:34709301-34710600	1300	8.98	0	899	0.000417779	0.0461418	promoter	507
NM_001290395	Awat2	chrX	100442717	100402221	-	chrX:100441801-100443200	1400	8.98	0	899	0.000417779	0.0461418	promoter	217
NM_201368	Xkr8	chr4	132732546	132724903	-	chr4:132731001-132733600	2600	18.78	3.67	5.10598	0.000856604	0.0508625	promoter	246
NM_175639	Wdr43	chr17	71616214	71659031	+	chr17:71614801-71618500	3700	25.31	6.12	4.13051	0.000390731	0.0461418	promoter	436
NM_026846	Zfand2b	chr1	75168734	75171626	+	chr1:75167401-75169700	2300	16.33	2.45	6.64228	0.000699507	0.0508625	promoter	-184
NM_001159906	Zfand2b	chr1	75168645	75171626	+	chr1:75167401-75169700	2300	16.33	2.45	6.64228	0.000699507	0.0508625	promoter	-95
NM_001159905	Zfand2b	chr1	75168645	75171626	+	chr1:75167401-75169700	2300	16.33	2.45	6.64228	0.000699507	0.0508625	promoter	-95
NR_106096	Mir7237	chr8	121978023	121978086	+	chr8:121976801-121980900	4100	30.21	9.8	3.08053	0.000950685	0.0508625	promoter	827
NM_010464	Hoxc13	chr15	102921130	102928814	+	chr15:102919201-102921000	1800	12.25	0	1226	3.78041e-05	0.0217706	promoter	-1030
NM_212445	Kdelc2	chr9	53384022	53401867	+	chr9:53383001-53386200	3200	23.68	6.12	3.8646	0.000891092	0.0508625	promoter	578
NM_010629	Kifap3	chr1	163779582	163917107	+	chr1:163778401-163779500	1100	8.16	0	817	0.000767161	0.0508625	promoter	-632
NM_001305643	Kifap3	chr1	163779582	163917107	+	chr1:163778401-163779500	1100	8.16	0	817	0.000767161	0.0508625	promoter	-632
NM_026024	Ube2t	chr1	134962564	134974179	+	chr1:134959001-134963100	4100	28.58	8.57	3.33217	0.000748874	0.0508625	promoter	-1514
NM_001278115	Ube2t	chr1	134962564	134974179	+	chr1:134959001-134963100	4100	28.58	8.57	3.33217	0.000748874	0.0508625	promoter	-1514
NM_016738	Rpl13	chr8	123102349	123105242	+	chr8:123098201-123102600	4400	43.27	14.7	2.94222	0.000124585	0.0322374	promoter	-1949
NM_053089	Naa15	chr3	51416015	51475985	+	chr3:51413201-51417800	4600	64.5	28.17	2.28921	0.00013047	0.0335291	promoter	-515
NM_001109747	Cenpw	chr10	30200540	30196008	-	chr10:30199201-30202500	3300	21.23	3.67	5.77174	0.000216387	0.0388555	promoter	-310
NM_027268	Scrn1	chr6	54566382	54508815	-	chr6:54564401-54565700	1300	8.98	0	899	0.000417779	0.0461418	promoter	1332
NM_001011757	Olfr663	chr7	104703568	104704603	+	chr7:104701601-104704800	3200	20.41	3.67	5.54891	0.000343545	0.0461418	promoter	-368
NR_126078	4930447F24Rik	chr9	108133717	108138567	+	chr9:108133101-108134500	1400	8.16	0	817	0.000767161	0.0508625	promoter	83
NM_001168274	Gsdmc2	chr15	63845176	63824345	-	chr15:63843501-63845400	1900	13.88	1.22	11.2927	0.000420465	0.0461418	promoter	726
NM_177912	Gsdmc2	chr15	63845176	63824345	-	chr15:63843501-63845400	1900	13.88	1.22	11.2927	0.000420465	0.0461418	promoter	726
NM_012026	Arhgef28	chr13	98206165	97898594	-	chr13:98204101-98206200	2100	17.15	2.45	6.97561	0.000429473	0.0461418	promoter	1015
NM_001013380	Dync1li2	chr8	104443047	104417673	-	chr8:104438301-104444500	6200	44.09	13.47	3.27151	3.44053e-05	0.0217706	promoter	1647
NM_030082	Hist3h2ba	chr11	58948910	58949372	+	chr11:58949101-58950900	1800	10.61	0	1062	0.000125063	0.0322374	promoter	1090
NR_040403	Gm15417	chr3	89391863	89398779	+	chr3:89389701-89392000	2300	22.05	3.67	5.99457	0.000135845	0.0344171	promoter	-1013
NM_001166456	Slc38a1	chr15	96642343	96571417	-	chr15:96638801-96643800	5000	38.38	12.25	3.13132	0.000168006	0.0375936	promoter	1043
NM_134086	Slc38a1	chr15	96641962	96571417	-	chr15:96638801-96643800	5000	38.38	12.25	3.13132	0.000168006	0.0375936	promoter	662
NM_001166458	Slc38a1	chr15	96642913	96571417	-	chr15:96638801-96643800	5000	38.38	12.25	3.13132	0.000168006	0.0375936	promoter	1613
NR_105965	Mir6999	chr2	91944930	91944869	-	chr2:91944301-91946300	2000	14.7	0	1471	6.36798e-06	0.0114397	promoter	-370
NM_133685	Rab31	chr17	65772752	65651725	-	chr17:65768401-65773500	5100	44.09	15.92	2.76836	0.000208107	0.0388555	promoter	1802
NM_133887	Stx12	chr4	132884458	132854063	-	chr4:132883501-132885400	1900	13.88	0	1389	1.15129e-05	0.0145448	promoter	8
NM_146717	Olfr433	chr1	174041932	174042936	+	chr1:174040601-174042800	2200	15.51	1.22	12.6179	0.00014461	0.0349564	promoter	-232
NM_001007575	Zfp58	chr13	67500522	67490166	-	chr13:67499001-67501000	2000	16.33	2.45	6.64228	0.000699507	0.0508625	promoter	522
NM_145713	Hist1h1d	chr13	23555031	23555807	+	chr13:23554301-23558300	4000	31.03	6.12	5.06362	1.94302e-05	0.018268	promoter	1269
NM_023167	Mrpl4	chr9	21002736	21008837	+	chr9:21002201-21003800	1600	10.61	0	1062	0.000125063	0.0322374	promoter	264
NM_001128605	Psen2	chr1	180256300	180227003	-	chr1:180254401-180260100	5700	46.54	17.15	2.7127	0.000173851	0.0386665	promoter	-950
NM_025919	Rpl11	chr4	136053371	136049947	-	chr4:136050701-136053400	2700	20.41	3.67	5.54891	0.000343545	0.0461418	promoter	1321
NR_105031	Gm12596	chr4	59260050	59269144	+	chr4:59259501-59261100	1600	10.61	0	1062	0.000125063	0.0322374	promoter	250
NM_001252571	Phyhd1	chr2	30266818	30282149	+	chr2:30265101-30271900	6800	59.6	23.27	2.56057	4.90654e-05	0.0251185	promoter	1682
NM_001252570	Phyhd1	chr2	30266818	30282149	+	chr2:30265101-30271900	6800	59.6	23.27	2.56057	4.90654e-05	0.0251185	promoter	1682
NM_001281829	Phyhd1	chr2	30266720	30282149	+	chr2:30265101-30271900	6800	59.6	23.27	2.56057	4.90654e-05	0.0251185	promoter	1780
NM_008775	Pafah1b2	chr9	45984871	45965310	-	chr9:45985301-45987600	2300	17.15	0	1716	1.08562e-06	0.00577456	promoter	-1579
NM_001104617	Rdx	chr9	52047940	52075177	+	chr9:52043801-52049000	5200	44.91	15.92	2.81984	0.00014868	0.0356996	promoter	-1540
NM_001104616	Rdx	chr9	52047149	52088738	+	chr9:52043801-52049000	5200	44.91	15.92	2.81984	0.00014868	0.0356996	promoter	-749
NM_009041	Rdx	chr9	52047940	52088738	+	chr9:52043801-52049000	5200	44.91	15.92	2.81984	0.00014868	0.0356996	promoter	-1540
NM_144789	Prdm15	chr16	97851227	97791466	-	chr16:97846701-97854400	7700	74.3	25.72	2.88807	6.96376e-07	0.00503307	promoter	677
NM_001024917	N4bp2	chr5	65763520	65826784	+	chr5:65763001-65764900	1900	13.06	1.22	10.626	0.000715246	0.0508625	promoter	430
NM_001347335	Mtch1	chr17	29347932	29332075	-	chr17:29347901-29349300	1400	8.98	0	899	0.000417779	0.0461418	promoter	-668
NM_019880	Mtch1	chr17	29347904	29332075	-	chr17:29347901-29349300	1400	8.98	0	899	0.000417779	0.0461418	promoter	-696
NM_026833	Washc1	chr17	66111545	66120503	+	chr17:66109301-66112800	3500	31.84	8.57	3.71212	0.000159344	0.0365666	promoter	-495
NM_001037757	Washc1	chr17	66111644	66120503	+	chr17:66109301-66112800	3500	31.84	8.57	3.71212	0.000159344	0.0365666	promoter	-594
NM_001284381	Adra1b	chr11	43901237	43774604	-	chr11:43899601-43901500	1900	13.06	1.22	10.626	0.000715246	0.0508625	promoter	687
NM_001284380	Adra1b	chr11	43901237	43774604	-	chr11:43899601-43901500	1900	13.06	1.22	10.626	0.000715246	0.0508625	promoter	687
NM_025662	Pigk	chr3	152714099	152789013	+	chr3:152715001-152716000	1000	8.16	0	817	0.000767161	0.0508625	promoter	1401
NM_178016	Pigk	chr3	152714099	152789013	+	chr3:152715001-152716000	1000	8.16	0	817	0.000767161	0.0508625	promoter	1401
NM_012050	Omd	chr13	49582746	49592609	+	chr13:49580201-49583500	3300	22.05	2.45	8.96748	2.17292e-05	0.018268	promoter	-896
NR_045627	1700120C14Rik	chr15	99251787	99262041	+	chr15:99251401-99255400	4000	31.03	7.35	4.21739	7.35843e-05	0.0281635	promoter	1613
NM_016766	Mcrs1	chr15	99251961	99242816	-	chr15:99251401-99255400	4000	31.03	7.35	4.21739	7.35843e-05	0.0281635	promoter	-1439
NM_001164156	Mcrs1	chr15	99251961	99242816	-	chr15:99251401-99255400	4000	31.03	7.35	4.21739	7.35843e-05	0.0281635	promoter	-1439
NM_031180	Klb	chr5	65348410	65384003	+	chr5:65348601-65351000	2400	20.41	3.67	5.54891	0.000343545	0.0461418	promoter	1390
NM_011982	Homer1	chr13	93303756	93356885	+	chr13:93303401-93304900	1500	8.98	0	899	0.000417779	0.0461418	promoter	394
NM_001347598	Homer1	chr13	93303756	93367303	+	chr13:93303401-93304900	1500	8.98	0	899	0.000417779	0.0461418	promoter	394
NM_001284189	Homer1	chr13	93303756	93405129	+	chr13:93303401-93304900	1500	8.98	0	899	0.000417779	0.0461418	promoter	394
NM_147176	Homer1	chr13	93303756	93405129	+	chr13:93303401-93304900	1500	8.98	0	899	0.000417779	0.0461418	promoter	394
NM_007952	Pdia3	chr2	121413901	121438686	+	chr2:121412501-121415000	2500	18.78	2.45	7.63821	0.000160448	0.0365666	promoter	-151
NM_153075	Catsper2	chr2	121413792	121394354	-	chr2:121412501-121415000	2500	18.78	2.45	7.63821	0.000160448	0.0365666	promoter	42
NR_106009	Mir7042	chr6	113707207	113707265	+	chr6:113705401-113707100	1700	8.16	0	817	0.000767161	0.0508625	promoter	-957
NM_175160	Zdhhc1	chr8	105496870	105472424	-	chr8:105497201-105500400	3200	28.58	8.57	3.33217	0.000748874	0.0508625	promoter	-1930
NM_001008423	Ccdc177	chr12	80760715	80755446	-	chr12:80759001-80762400	3400	23.68	4.9	4.82485	0.000247429	0.0389464	promoter	15
NM_146664	Olfr734	chr14	50320833	50319891	-	chr14:50321701-50323100	1400	8.16	0	817	0.000767161	0.0508625	promoter	-1567
NM_001284414	Vps25	chr11	101253706	101258047	+	chr11:101252501-101253700	1200	8.16	0	817	0.000767161	0.0508625	promoter	-606
NM_026776	Vps25	chr11	101253706	101259547	+	chr11:101252501-101253700	1200	8.16	0	817	0.000767161	0.0508625	promoter	-606
NM_001284412	Vps25	chr11	101253706	101259547	+	chr11:101252501-101253700	1200	8.16	0	817	0.000767161	0.0508625	promoter	-606
NM_001284411	Vps25	chr11	101253706	101259547	+	chr11:101252501-101253700	1200	8.16	0	817	0.000767161	0.0508625	promoter	-606
NM_001145898	BC052040	chr2	115581715	115778768	+	chr2:115581101-115583400	2300	22.05	3.67	5.99457	0.000135845	0.0344171	promoter	535
NM_207264	BC052040	chr2	115581715	115778768	+	chr2:115581101-115583400	2300	22.05	3.67	5.99457	0.000135845	0.0344171	promoter	535
NM_028658	Ppp1r21	chr17	88530123	88588367	+	chr17:88530801-88532500	1700	11.43	0	1144	6.86875e-05	0.0268853	promoter	1527
NR_040721	Snhg5	chr9	88522897	88521052	-	chr9:88523501-88524600	1100	8.16	0	817	0.000767161	0.0508625	promoter	-1153
NM_001127363	Inpp5a	chr7	139389108	139579652	+	chr7:139388901-139390400	1500	9.8	0	981	0.000228261	0.0388555	promoter	542
NM_183144	Inpp5a	chr7	139389108	139579652	+	chr7:139388901-139390400	1500	9.8	0	981	0.000228261	0.0388555	promoter	542
NM_001003948	Pid1	chr1	84284645	84036292	-	chr1:84284101-84286000	1900	12.25	0	1226	3.78041e-05	0.0217706	promoter	-405
NM_001080819	Arid1a	chr4	133753611	133679007	-	chr4:133754101-133756800	2700	18.78	1.22	15.2764	1.68413e-05	0.018268	promoter	-1839
NM_011957	Creb3l1	chr2	92024170	91982327	-	chr2:92022101-92023500	1400	11.43	0	1144	6.86875e-05	0.0268853	promoter	1370
NM_175113	Trmt6	chr2	132816054	132804214	-	chr2:132814801-132817200	2400	18.78	2.45	7.63821	0.000160448	0.0365666	promoter	54
NM_025676	Mcm8	chr2	132816140	132844188	+	chr2:132814801-132817200	2400	18.78	2.45	7.63821	0.000160448	0.0365666	promoter	-140
NM_001291054	Mcm8	chr2	132816140	132844188	+	chr2:132814801-132817200	2400	18.78	2.45	7.63821	0.000160448	0.0365666	promoter	-140
NM_008338	Ifngr2	chr16	91547093	91564007	+	chr16:91545701-91551000	5300	36.74	9.8	3.74618	4.58036e-05	0.0249883	promoter	1257
NM_008668	Nab2	chr10	127666703	127660917	-	chr10:127664101-127666000	1900	13.88	1.22	11.2927	0.000420465	0.0461418	promoter	1653
NM_001122895	Nab2	chr10	127666703	127660917	-	chr10:127664101-127666000	1900	13.88	1.22	11.2927	0.000420465	0.0461418	promoter	1653
NM_009147	Sec23a	chr12	59012017	58958383	-	chr12:59010201-59014500	4300	34.29	12.25	2.79772	0.000975748	0.0508625	promoter	-333
NM_025656	Gemin2	chr12	59013390	59028470	+	chr12:59010201-59014500	4300	34.29	12.25	2.79772	0.000975748	0.0508625	promoter	-1040
NR_126084	4930524B17Rik	chr6	19278843	19247898	-	chr6:19279001-19280300	1300	8.16	0	817	0.000767161	0.0508625	promoter	-807
NM_173753	Fnip1	chr11	54438178	54518241	+	chr11:54435501-54437700	2200	16.33	1.22	13.2846	8.4628e-05	0.0303005	promoter	-1578
NM_001112721	Ubr5	chr15	38078854	37967327	-	chr15:38079201-38080400	1200	8.16	0	817	0.000767161	0.0508625	promoter	-946
NM_001081359	Ubr5	chr15	38078854	37967327	-	chr15:38079201-38080400	1200	8.16	0	817	0.000767161	0.0508625	promoter	-946
NM_025975	Dynlt3	chrX	9662983	9654269	-	chrX:9661901-9663300	1400	8.16	0	817	0.000767161	0.0508625	promoter	383
NM_001102650	Nt5c3b	chr11	100441089	100429351	-	chr11:100439501-100441400	1900	12.25	0	1226	3.78041e-05	0.0217706	promoter	639
NM_026561	Nt5c3b	chr11	100441089	100422320	-	chr11:100439501-100441400	1900	12.25	0	1226	3.78041e-05	0.0217706	promoter	639
NM_025727	Klhl10	chr11	100441923	100457024	+	chr11:100439501-100441400	1900	12.25	0	1226	3.78041e-05	0.0217706	promoter	-1473
NM_173011	Idh2	chr7	80115350	80094846	-	chr7:80114201-80115400	1200	8.98	0	899	0.000417779	0.0461418	promoter	550
NM_145857	Nod2	chr8	88647346	88688474	+	chr8:88646501-88647900	1400	9.8	0	981	0.000228261	0.0388555	promoter	-146
NM_011195	Ptcra	chr17	46763712	46755662	-	chr17:46764801-46766100	1300	8.16	0	817	0.000767161	0.0508625	promoter	-1738

## Sheet: down_CGRP-ChIP-HDAC2_vs_Con-Ch
differentially enriched regions for down_CGRP-ChIP-HDAC2_vs_Con-ChIP-HDAC2 (promoter) Fold Change: 2.0 P-value: 0.001 Column A: RefSeq_name: Refseq accession number of the nearest gene to a peak. Column B: Symbol: Gene symbol. Column C: Chr: The chromosome that the transcript lies in. Column D: TSS: The start sites of the transcript. Column E: TTS: The end sites of the transcript. Column F: Stran…
Refseq_name	symbol	chr	TSS	TTS	strand	chr:start-end	length	CGRP-ChIP-A1-HDAC2 count	Con-ChIP-B1-HDAC2 count	fc	pval	padj	differentially enriched regions Classification	center_to_TSS
NM_009630	Adora2a	chr10	75316876	75334792	+	chr10:75317101-75318500	1400	0	8.57	858	0.000565879	0.0508625	promoter	924
NM_001331095	Adora2a	chr10	75317599	75334792	+	chr10:75317101-75318500	1400	0	8.57	858	0.000565879	0.0508625	promoter	201
NM_138746	Fam50b	chr13	34739641	34747622	+	chr13:34737401-34741500	4100	12.25	35.52	2.89804	0.000581547	0.0508625	promoter	-191
NR_102724	LOC100504039	chrX	53686526	53691325	+	chrX:53684201-53687400	3200	2.45	23.27	9.46341	1.01779e-05	0.0145448	promoter	-726
NM_027700	4933416I08Rik	chrX	53686490	53691332	+	chrX:53684201-53687400	3200	2.45	23.27	9.46341	1.01779e-05	0.0145448	promoter	-690
NM_010582	Itih2	chr2	10130683	10094590	-	chr2:10129101-10130500	1400	0	8.57	858	0.000565879	0.0508625	promoter	883
NM_207563	Olfr1057	chr2	86375410	86374462	-	chr2:86372801-86374400	1600	0	9.8	981	0.000228261	0.0388555	promoter	1810
NM_001104625	Vmn2r14	chr5	109224622	109215501	-	chr5:109222601-109225400	2800	4.08	24.49	5.99022	5.77037e-05	0.0268853	promoter	622
NM_008806	Pde6b	chr5	108388372	108431742	+	chr5:108386201-108388500	2300	5.72	24.49	4.27574	0.000391217	0.0461418	promoter	-1022
NM_001190319	C1qtnf5	chr9	44107308	44109187	+	chr9:44106901-44109100	2200	3.27	22.05	6.72561	7.73327e-05	0.0292618	promoter	692
NM_001040632	C1qtnf5	chr9	44107270	44109187	+	chr9:44106901-44109100	2200	3.27	22.05	6.72561	7.73327e-05	0.0292618	promoter	730
NM_001040631	C1qtnf5	chr9	44107244	44109187	+	chr9:44106901-44109100	2200	3.27	22.05	6.72561	7.73327e-05	0.0292618	promoter	756
NM_001030292	Kcnk15	chr2	163853749	163858874	+	chr2:163852201-163856000	3800	7.35	28.17	3.8288	0.00030769	0.0461048	promoter	351
NM_001163700	Nr1h4	chr10	89506658	89454233	-	chr10:89505301-89506400	1100	0	8.57	858	0.000565879	0.0508625	promoter	808
NM_009108	Nr1h4	chr10	89506658	89454233	-	chr10:89505301-89506400	1100	0	8.57	858	0.000565879	0.0508625	promoter	808
NM_009533	Xrcc5	chr1	72307420	72394953	+	chr1:72308001-72310600	2600	2.45	19.6	7.97154	9.76745e-05	0.0322374	promoter	1880
NM_133815	Lbr	chr1	181842401	181815314	-	chr1:181841101-181845000	3900	10.61	31.84	2.99906	0.000859567	0.0508625	promoter	-649
NM_001033332	Tmtc3	chr10	100487347	100448183	-	chr10:100484701-100487000	2300	3.27	18.37	5.60366	0.000648143	0.0508625	promoter	1497
NM_001110013	Tmtc3	chr10	100487347	100443901	-	chr10:100484701-100487000	2300	3.27	18.37	5.60366	0.000648143	0.0508625	promoter	1497
NM_001161853	Smarcb1	chr10	75921614	75896768	-	chr10:75920401-75921800	1400	0	8.57	858	0.000565879	0.0508625	promoter	514
NM_011418	Smarcb1	chr10	75921614	75896768	-	chr10:75920401-75921800	1400	0	8.57	858	0.000565879	0.0508625	promoter	514
NR_106084	Mir7225	chr3	97690562	97690508	-	chr3:97691101-97693500	2400	2.45	17.15	6.97561	0.000429473	0.0461418	promoter	-1738
NM_031408	Gigyf1	chr5	137518879	137527935	+	chr5:137518701-137520300	1600	0.82	12.25	14.7711	0.000531438	0.0508625	promoter	621
NM_207230	Olfr320	chr11	58683874	58684795	+	chr11:58682701-58685000	2300	1.63	14.7	8.96951	0.000526065	0.0508625	promoter	-24
NM_133709	Chrdl2	chr7	100006403	100034726	+	chr7:100004701-100006200	1500	0	8.57	858	0.000565879	0.0508625	promoter	-953
NM_007732	Col17a1	chr19	47692042	47646340	-	chr19:47689401-47692700	3300	3.27	20.82	6.35061	0.000158197	0.0365666	promoter	992
NM_001290825	Col17a1	chr19	47692042	47646340	-	chr19:47689401-47692700	3300	3.27	20.82	6.35061	0.000158197	0.0365666	promoter	992
NM_001033408	Rbm44	chr1	91145102	91170795	+	chr1:91142501-91143800	1300	0	8.57	858	0.000565879	0.0508625	promoter	-1952
NM_025999	Rnf141	chr7	110844381	110816534	-	chr7:110841301-110844400	3100	5.72	28.17	4.91798	5.63413e-05	0.0268853	promoter	1531
NM_025647	Cmpk1	chr4	114987228	114960612	-	chr4:114987801-114990100	2300	1.63	17.15	10.4634	0.000111135	0.0322374	promoter	-1722
NM_007873	Doc2b	chr11	75796060	75768270	-	chr11:75794701-75796600	1900	0.82	12.25	14.7711	0.000531438	0.0508625	promoter	410
NR_136932	Gm12339	chr11	75795808	75853912	+	chr11:75794701-75796600	1900	0.82	12.25	14.7711	0.000531438	0.0508625	promoter	-158
NR_136933	Gm12339	chr11	75795808	75853912	+	chr11:75794701-75796600	1900	0.82	12.25	14.7711	0.000531438	0.0508625	promoter	-158
NM_177367	Gemin4	chr11	76217572	76210570	-	chr11:76216001-76217700	1700	0	9.8	981	0.000228261	0.0388555	promoter	722
NM_021294	Dbil5	chr11	76217612	76218665	+	chr11:76216001-76217700	1700	0	9.8	981	0.000228261	0.0388555	promoter	-762
NM_145131	Pitrm1	chr13	6548156	6580149	+	chr13:6549401-6550800	1400	0	8.57	858	0.000565879	0.0508625	promoter	1944
NM_007424	Acan	chr7	79053482	79115099	+	chr7:79051001-79052100	1100	0	8.57	858	0.000565879	0.0508625	promoter	-1932
NR_132432	Gm26633	chr7	79053323	79018052	-	chr7:79051001-79052100	1100	0	8.57	858	0.000565879	0.0508625	promoter	1773
NM_001011872	Olfr1034	chr2	86046443	86047466	+	chr2:86046601-86049400	2800	4.08	20.82	5.09291	0.000452311	0.0482673	promoter	1557
NR_045920	4933404G15Rik	chr16	16718121	16707686	-	chr16:16716101-16717600	1500	0.82	12.25	14.7711	0.000531438	0.0508625	promoter	1271
NM_001276446	Alad	chr4	62519909	62505983	-	chr4:62517801-62519000	1200	0	8.57	858	0.000565879	0.0508625	promoter	1509
NM_008525	Alad	chr4	62520063	62505983	-	chr4:62517801-62519000	1200	0	8.57	858	0.000565879	0.0508625	promoter	1663
NM_022995	Pmepa1	chr2	173276533	173224464	-	chr2:173276601-173279800	3200	4.08	25.72	6.29095	2.86506e-05	0.0217706	promoter	-1667
NR_045730	4933400L20Rik	chr8	103603798	103680382	+	chr8:103603501-103605500	2000	1.63	17.15	10.4634	0.000111135	0.0322374	promoter	702
NM_001081437	Fbln2	chr6	91212763	91272540	+	chr6:91210401-91211500	1100	0	8.57	858	0.000565879	0.0508625	promoter	-1813
NM_007992	Fbln2	chr6	91212763	91272540	+	chr6:91210401-91211500	1100	0	8.57	858	0.000565879	0.0508625	promoter	-1813
NR_033388	Gm3002	chr14	3814912	3830681	+	chr14:3812101-3814700	2600	1.63	14.7	8.96951	0.000526065	0.0508625	promoter	-1512
NM_001252082	Zswim8	chr14	20707551	20723619	+	chr14:20705801-20707700	1900	0	9.8	981	0.000228261	0.0388555	promoter	-801
NM_027996	Zswim8	chr14	20707551	20723619	+	chr14:20705801-20707700	1900	0	9.8	981	0.000228261	0.0388555	promoter	-801
NM_001252081	Zswim8	chr14	20707551	20723619	+	chr14:20705801-20707700	1900	0	9.8	981	0.000228261	0.0388555	promoter	-801
NM_177843	Gm14461	chr2	78237546	78302230	+	chr2:78238001-78239300	1300	0	9.8	981	0.000228261	0.0388555	promoter	1104
NM_010970	Olfr23	chr11	73940247	73941225	+	chr11:73936901-73939900	3000	8.98	30.62	3.40712	0.000408102	0.0461418	promoter	-1847
NM_025532	Prl2b1	chr13	27390846	27383344	-	chr13:27390701-27393400	2700	2.45	19.6	7.97154	9.76745e-05	0.0322374	promoter	-1204
NM_001011536	Olfr566	chr7	102857271	102856320	-	chr7:102854801-102857700	2900	4.08	19.6	4.79462	0.000884177	0.0508625	promoter	1021
NM_001142943	Zfp949	chr9	88548019	88571086	+	chr9:88546301-88549700	3400	7.35	29.39	3.99457	0.000167564	0.0375936	promoter	-19
NM_001163061	Zfp949	chr9	88548019	88571086	+	chr9:88546301-88549700	3400	7.35	29.39	3.99457	0.000167564	0.0375936	promoter	-19
NM_001285937	Zdbf2	chr1	63200357	63314575	+	chr1:63199401-63200600	1200	0	8.57	858	0.000565879	0.0508625	promoter	-357
NM_001285936	Zdbf2	chr1	63200357	63314575	+	chr1:63199401-63200600	1200	0	8.57	858	0.000565879	0.0508625	promoter	-357
NM_009243	Serpina1a	chr12	103863619	103853294	-	chr12:103864501-103866400	1900	1.63	14.7	8.96951	0.000526065	0.0508625	promoter	-1831
NM_001252569	Serpina1a	chr12	103863619	103853294	-	chr12:103864501-103866400	1900	1.63	14.7	8.96951	0.000526065	0.0508625	promoter	-1831
NM_172530	She	chr3	89831369	89858846	+	chr3:89831601-89834800	3200	6.53	28.17	4.30887	0.000137267	0.0346924	promoter	1831
NM_207142	Olfr1036	chr2	86074703	86075718	+	chr2:86072801-86073800	1000	0	8.57	858	0.000565879	0.0508625	promoter	-1403
NM_207136	Olfr1349	chr7	6515427	6514473	-	chr7:6513201-6514300	1100	0	8.57	858	0.000565879	0.0508625	promoter	1677
NM_011260	Reg3g	chr6	78468874	78466268	-	chr6:78467301-78468300	1000	0	8.57	858	0.000565879	0.0508625	promoter	1074
NM_001081146	Prickle2	chr6	92706184	92370891	-	chr6:92704501-92706400	1900	0	11.02	1103	9.26578e-05	0.0317725	promoter	734
NM_029796	Lrg1	chr17	56121946	56119677	-	chr17:56119701-56121600	1900	0.82	12.25	14.7711	0.000531438	0.0508625	promoter	1296
NM_001081285	Mup6	chr4	60003548	60006214	+	chr4:60003701-60005600	1900	2.45	15.92	6.47561	0.000891634	0.0508625	promoter	1102
NM_017378	Pcdh12	chr18	38284401	38267091	-	chr18:38282701-38284000	1300	0	9.8	981	0.000228261	0.0388555	promoter	1051
NM_146562	Olfr862	chr9	19884303	19883382	-	chr9:19882701-19883700	1000	0	8.57	858	0.000565879	0.0508625	promoter	1103
NM_207277	Msantd1	chr5	34915914	34923839	+	chr5:34914001-34915600	1600	0	12.25	1226	3.78041e-05	0.0217706	promoter	-1114
NM_001310550	Msantd1	chr5	34915914	34923839	+	chr5:34914001-34915600	1600	0	12.25	1226	3.78041e-05	0.0217706	promoter	-1114
NM_031195	Msr1	chr8	39642678	39603451	-	chr8:39640501-39643100	2600	4.9	22.05	4.49287	0.00059165	0.0508625	promoter	878
NM_001113326	Msr1	chr8	39642678	39581699	-	chr8:39640501-39643100	2600	4.9	22.05	4.49287	0.00059165	0.0508625	promoter	878
NM_139224	Defb35	chr8	21938351	21940878	+	chr8:21936001-21937200	1200	0	8.57	858	0.000565879	0.0508625	promoter	-1751
NM_001025246	Trp53i11	chr2	93187583	93201757	+	chr2:93184301-93187800	3500	4.9	25.72	5.24033	8.15398e-05	0.0303005	promoter	-1533
NM_017396	Cyp3a41a	chr5	145720136	145694048	-	chr5:145719201-145720700	1500	0.82	12.25	14.7711	0.000531438	0.0508625	promoter	186
NM_146788	Olfr1245	chr2	89575773	89574711	-	chr2:89576301-89578700	2400	2.45	17.15	6.97561	0.000429473	0.0461418	promoter	-1727
NR_030497	Mir717	chrX	52422515	52422406	-	chrX:52420701-52423200	2500	5.72	26.94	4.70332	0.000108329	0.0322374	promoter	565
NM_001167736	Chchd6	chr6	89595652	89383145	-	chr6:89593301-89595500	2200	3.27	18.37	5.60366	0.000648143	0.0508625	promoter	1252
NM_025351	Chchd6	chr6	89595652	89383145	-	chr6:89593301-89595500	2200	3.27	18.37	5.60366	0.000648143	0.0508625	promoter	1252
NR_126079	Gm3363	chr2	18760862	18742708	-	chr2:18761501-18763700	2200	3.27	18.37	5.60366	0.000648143	0.0508625	promoter	-1738
NM_173752	Lgalsl	chr11	20831108	20823354	-	chr11:20830201-20832800	2600	3.27	19.6	5.97866	0.00032142	0.0461418	promoter	-392
NR_033648	Vmn2r-ps129	chr17	23004970	23006659	+	chr17:23003601-23007300	3700	7.35	30.62	4.16168	9.051e-05	0.0317725	promoter	480
NM_001164360	Erlin1	chr19	44069785	44034942	-	chr19:44067301-44069700	2400	5.72	24.49	4.27574	0.000391217	0.0461418	promoter	1285
NM_001164359	Erlin1	chr19	44069775	44034942	-	chr19:44067301-44069700	2400	5.72	24.49	4.27574	0.000391217	0.0461418	promoter	1275
NM_145502	Erlin1	chr19	44069686	44034942	-	chr19:44067301-44069700	2400	5.72	24.49	4.27574	0.000391217	0.0461418	promoter	1186
NM_027217	1810046K07Rik	chr9	51328917	51289685	-	chr9:51330201-51331300	1100	0	8.57	858	0.000565879	0.0508625	promoter	-1833
NM_013927	Cngb3	chr4	19280849	19510623	+	chr4:19279401-19280900	1500	0	8.57	858	0.000565879	0.0508625	promoter	-699
NR_105825	Mir6399	chr4	138163208	138163292	+	chr4:138161401-138163700	2300	2.45	18.37	7.47154	0.000205442	0.0388555	promoter	-658
NM_001033208	Myzap	chr9	71592360	71504346	-	chr9:71592701-71594600	1900	0	13.47	1348	1.54886e-05	0.0177842	promoter	-1290
